# Supplementary material for: Multiple-Geographic-Scale Genetic Structure of Two Mangrove Tree Species: The Roles of Mating System, Hybridization, Limited Dispersal and Extrinsic Factors
Source: PLoS One. 2015 Feb 27;10(2):e0118710. doi: 10.1371/journal.pone.0118710 (PMC4344226; doi:10.1371/journal.pone.0118710)
Supplement: S1 File — (XLSX) [file pone.0118710.s004.xlsx]

## Sheet: Agerminans
SampleID	Locality (City, state)	Geographic Coordinate	Agerm1-02		Agerm1-03		Agerm1-06		Agerm1-07		Agerm1-12		Agerm1-14		Agerm1-15		Agerm1-16		Agerm1-19		Agerm1-21		Agerm1-22		Agerm1-25		CTT01		T7		T8		Aschau1-01		Aschau1-02		Aschau1-03		Aschau1-04		Aschau1-05		Aschau1-06		Aschau1-08		Aschau1-09
AgALC01	Alcântara, Maranhão	2° 24' 37"S, 44° 24' 22"W	170	176	161	161	173	173	159	159	125	123	159	163	246	244	178	178	247	247	152	148	167	167	237	239	123	123	200	184							203	203	226	228	175	185	176	178	170	170	190	190
AgALC02	Alcântara, Maranhão	2° 24' 37"S, 44° 24' 22"W	170	174	161	155	173	173	159	159	127	125	165	167	246	244	178	174	251	253	152	152	167	167	239	239	105	105	188	184			209	209	136	138	203	217	226	226	175	175	172	176	172	172	190	190
AgALC03	Alcântara, Maranhão	2° 24' 37"S, 44° 24' 22"W	170	176	161	161	173	173	159	159	129	125	165	169	246	244	178	178	247	247	152	152	167	167	237	239	105	105	186	186			207	211	138	140	199	203	224	226	185	185	170	184	172	172	190	190
AgALC04	Alcântara, Maranhão	2° 24' 37"S, 44° 24' 22"W	170	174	161	161	173	173	159	159	125	125	163	163	246	278	178	178	247	247	150	150	167	167	239	239	105	105	188	188	121	121	205	205	138	138	199	199	228	228	203	203	176	184	172	172	190	190
AgALC05	Alcântara, Maranhão	2° 24' 37"S, 44° 24' 22"W	176	176	161	161	173	173	159	159	135	127	165	165	262	262	178	178	245	245	150	152	167	167	237	237	123	105	184	184	121	121	209	209	138	140	203	203	222	228	181	185	170	186	172	172	190	190
AgALC06	Alcântara, Maranhão	2° 24' 37"S, 44° 24' 22"W	170	170	161	155	173	173	159	159	129	125	165	165	260	252	178	174	245	245	148	152	167	167	239	239	123	105	188	184	121	121	207	207	136	138	201	203	222	226	175	175	176	176	172	178	190	190
AgALC07	Alcântara, Maranhão	2° 24' 37"S, 44° 24' 22"W	176	170	161	161	173	173	159	159	135	123	165	165	246	244	178	174	245	243	148	148	167	167	237	237	108	105	194	186	121	121	209	209	136	140	199	201	224	228	175	175	176	176	172	172	190	190
AgALC08	Alcântara, Maranhão	2° 24' 37"S, 44° 24' 22"W	176	176	161	161	173	173	159	159	129	127	163	165	244	244	178	174	247	247	148	150	167	167	239	241	105	105	188	184			209	211	136	136	203	203	224	228	175	185	170	176	172	172	190	190
AgALC10	Alcântara, Maranhão	2° 24' 37"S, 44° 24' 22"W	170	170	161	161	173	173	159	159	129	127	165	165	244	276	174	178	245	249	150	152	167	167	239	239	105	105	188	186			205	209	136	140	203	203	224	228	175	175	176	178	172	178	190	190
AgALC11	Alcântara, Maranhão	2° 24' 37"S, 44° 24' 22"W	170	170	161	161	173	173	159	159	125	123	165	165	244	278	174	178	243	249	150	152	167	167	237	239	123	108	190	184	121	121	207	207	136	136	203	203	224	224	175	175	176	178	172	172	190	190
AgALC12	Alcântara, Maranhão	2° 24' 37"S, 44° 24' 22"W	170	176	161	161	173	173	159	159	123	125	165	167	262	262	178	178	245	245	150	152	167	167	237	237	105	105	184	184	117	121	205	207			201	203	226	226	175	185	176	176	172	172	190	190
AgALC13	Alcântara, Maranhão	2° 24' 37"S, 44° 24' 22"W	176	182	161	165	173	173	159	153	135	135	165	165	258	278	178	178	243	241	150	150	161	167	237	237	105	99	184	168	109	109	207	219	136	148	203	215	226	226	175	175	174	186	170	182	190	190
AgALC14	Alcântara, Maranhão	2° 24' 37"S, 44° 24' 22"W	174	174	161	161	173	173	159	157	137	125	165	167	278	292	178	178	243	249	150	152	167	167	239	239	111	105	184	184	121	117	205	211	136	136	203	203	226	228	175	175	170	176	172	176	190	190
AgALC15	Alcântara, Maranhão	2° 24' 37"S, 44° 24' 22"W	170	176	161	155	173	173	159	159	137	125	169	169	262	292	178	174	243	249	150	150	167	167	239	239	123	123	186	186	121	117	207	207	138	140	203	203	224	228	175	175	176	176	172	172	190	190
AgALC16	Alcântara, Maranhão	2° 24' 37"S, 44° 24' 22"W	176	176	161	161	173	173	159	159	125	123	165	165	262	274	178	178	243	245	152	152	167	167	237	239	105	105	188	184	117	117	209	211	138	140	203	203	226	226	175	175	176	176	172	178	190	190
AgALC17	Alcântara, Maranhão	2° 24' 37"S, 44° 24' 22"W	170	168	161	161	173	173	159	159	125	125	163	163	270	274	178	178	243	243	150	152	167	167	237	239	105	105	186	186	121	121	205	207	136	136	203	203	226	226	175	175			172	172	190	190
AgALC18	Alcântara, Maranhão	2° 24' 37"S, 44° 24' 22"W	170	182	161	165	173	173	159	161	123	125	165	165	244	258	178	178	241	245	150	150	161	167	237	239	105	99	186	172	109	109	207	209	138	140	203	225	226	226	175	185	170	174	172	182	190	190
AgALC20	Alcântara, Maranhão	2° 24' 37"S, 44° 24' 22"W	174	176	161	155	173	173	159	159	135	125	165	165	246	262	178	178	243	245	152	152	167	167	239	239	105	105	186	184	117	121	207	207	136	136	201	203	226	226	175	203	170	184	172	172	190	190
AgALC21	Alcântara, Maranhão	2° 24' 37"S, 44° 24' 22"W	170	170	161	161	173	173	159	159	127	125	165	159	262	262	174	178	245	245	152	152	167	167	237	239	105	105	184	184			203	205	136	138	201	203	222	226	185	187	176	176	172	172	190	190
AgALC22	Alcântara, Maranhão	2° 24' 37"S, 44° 24' 22"W	176	176	161	161	173	173	159	159	129	127	165	159			178	178	249	249	152	152	167	167	237	237	108	123	186	184					138	138	201	203	226	226	175	175	170	170	172	172	190	190
AgALC23	Alcântara, Maranhão	2° 24' 37"S, 44° 24' 22"W	176	170	161	161	173	173	159	159	127	123	165	163	248	296	178	178	243	243	152	152	167	167	237	239	111	105	200	186	121	121	207	209	136	138	203	203	226	228	175	175	176	176	170	178	190	190
AgALC24	Alcântara, Maranhão	2° 24' 37"S, 44° 24' 22"W	170	170	161	161	173	173	159	159	127	123	165	167	246	262	178	178	243	245	150	152	167	167	239	239	105	123	200	188	121	121	205	205			203	203	226	226	175	175	176	178	172	172	190	190
AgALC25	Alcântara, Maranhão	2° 24' 37"S, 44° 24' 22"W	170	176	161	155	173	173	159	159	123	121	165	169	262	274	178	178	243	245	150	150	167	167	239	239	105	123	184	184	121	121	205	209	136	140	203	203	226	228	175	175	170	176	172	178	190	190
AgALC26	Alcântara, Maranhão	2° 24' 37"S, 44° 24' 22"W	170	170	161	161	173	173	159	159	131	129	165	167	248	296	178	178	243	245	146	152	167	167	239	239	105	123	184	184			205	211			201	203	222	226	175	175	170	178	172	172	190	190
AgALC27	Alcântara, Maranhão	2° 24' 37"S, 44° 24' 22"W	170	170	161	161	173	173	159	159	123	113	165	167	246	250	178	178	245	245	148	148	167	167	239	239	105	105	184	184	121	117			138	138	199	203	226	226	175	175	176	176	178	178	190	190
AgALC28	Alcântara, Maranhão	2° 24' 37"S, 44° 24' 22"W	176	170	161	161	173	173	159	159	135	135	165	165	246	252	178	174	243	245	150	152	167	167	237	239	111	105	188	186	121	121					203	203	226	226	175	175	170	176	172	178	190	190
AgALC29	Alcântara, Maranhão	2° 24' 37"S, 44° 24' 22"W	176	170	161	161	173	173	159	159	123	123	165	165	246	296	174	174	243	243	152	152	167	167	239	239	111	111	200	200	121	121	205	211	136	140	201	201	228	228	175	175	170	176	170	172	190	190
AgALC30	Alcântara, Maranhão	2° 24' 37"S, 44° 24' 22"W	182	170	161	163	173	173	159	161	135	135	171	171			178	176	241	245	152	152	161	167	239	239	108	99	184	168	109	109	209	221	138	138	209	215	224	226	175	175	170	178	174	182	190	190
AgALC32	Alcântara, Maranhão	2° 24' 37"S, 44° 24' 22"W	182	176	161	163	173	173	159	161	125	125	165	165	258	278	178	176	241	243	152	152	161	167	239	239	105	99	184	168	121	109	207	223	136	148	203	233	224	228	175	175	178	184	174	182	190	190
AgMRJ05	Soure, Pará	0° 43' 26"S, 48° 29' 24"W	176	174	161	161	173	173	159	159	135	131	165	157	244	244	178	178	245	237	150	152	155	167			108	105	214	210	121	121			136	138	203	221	226	226	185	185	170	176	172	178	190	190
AgMRJ06	Soure, Pará	0° 43' 26"S, 48° 29' 24"W	174	166	155	161	175	173	159	159	133	129	159	173	244	296	178	174	245	237	150	152	167	167	239	239	105	105	204	196	125	121	209	211	138	138	201	203	226	226	175	181	176	184	178	182	190	190
AgMRJ07	Soure, Pará	0° 43' 26"S, 48° 29' 24"W	176	174	155	155	175	173	159	157	137	131	173	167	252	252	178	178	245	243	152	152	161	173	239	239	108	105	202	202	121	121	211	211	138	138	199	221	224	226	175	183	170	184	174	178	190	190
AgMRJ09	Soure, Pará	0° 43' 26"S, 48° 29' 24"W	174	172	155	161	175	175	159	159	135	135	159	159	244	254	174	174	243	229	150	152	167	167	239	239	111	111	214	192	121	121			136	138	203	203	226	226	175	185	172	184	172	182	190	190
AgMRJ10	Soure, Pará	0° 43' 26"S, 48° 29' 24"W	174	170	155	161	173	173	159	159	131	131	157	173	244	252	174	178	241	245	150	150	167	167	237	237	105	105	202	192	121	121			138	138	203	209	226	226	175	175	170	170	176	178	190	190
AgMRJ11	Soure, Pará	0° 43' 26"S, 48° 29' 24"W	174	172	155	155	175	173	159	159	131	129	157	159	248	252			239	239	150	150	161	167	239	239	111	105	218	202			211	211	138	138	221	223	226	226	175	181	170	184	176	180	190	190
AgMRJ12	Soure, Pará	0° 43' 26"S, 48° 29' 24"W	176	174	161	161	175	175	159	159	133	133	157	165	244	244	174	174	237	243	152	152	167	167	237	239	111	108	190	188					138	138					175	183	172	184	174	178	190	190
AgMRJ13	Soure, Pará	0° 43' 26"S, 48° 29' 24"W	174	166	155	155	173	173	159	159	135	131	159	159	252	252	174	174	237	245	152	152	167	167	237	239	120	108	214	212	121	121	211	213	138	138	201	205	226	226	175	183	182	184	166	182	190	190
AgMRJ14	Soure, Pará	0° 43' 26"S, 48° 29' 24"W	174	174	161	155	175	173	159	157	131	131	159	167	244	246	174	178	237	237	152	152	161	167	237	239	108	105	206	188	125	113	213	215	138	138	203	219	226	226	175	187	170	170	172	182	190	190
AgMRJ16	Soure, Pará	0° 43' 26"S, 48° 29' 24"W	174	174	155	155	175	173	159	157	137	131	165	171	240	248	174	174	237	245	150	152	167	167	239	239	108	105	208	196	121	121					201	211	226	226	185	185	172	184	172	180	190	190
AgMRJ17	Soure, Pará	0° 43' 26"S, 48° 29' 24"W	176	174	161	155	173	173	159	159	131	131	161	161	252	268	174	174	239	245	150	150	167	167	237	237	120	108	208	184	121	121	209	211	138	138	201	203	224	226	183	183	170	172	172	182	190	190
AgMRJ18	Soure, Pará	0° 43' 26"S, 48° 29' 24"W	172	174	155	155	173	173	159	157	129	127	161	161	240	294	178	178	229	245	148	148	161	167	237	237	105	105	196	196			207	209	138	138	203	221			183	187	170	172	166	182	190	190
AgMRJ19	Soure, Pará	0° 43' 26"S, 48° 29' 24"W	174	176	161	155	173	173	159	159	135	133	165	171	242	252	174	174	239	243	152	152	167	167	239	239	105	105	192	188			209	211	138	138	201	201					170	184	172	176	190	190
AgMRJ20	Soure, Pará	0° 43' 26"S, 48° 29' 24"W	174	176	161	155	175	173	159	159	133	129	159	161	252	252	174	174	237	243	152	152	161	167	237	239	105	105	204	204	121	121			138	138	203	203			187	187	170	170	180	180	190	190
AgMRJ21	Soure, Pará	0° 43' 26"S, 48° 29' 24"W	174	172	155	155	173	173	157	159	131	131	159	171	242	252	174	174	245	245	146	146	155	173	237	237	108	105	208	192	121	121	209	211	138	138	221	223	226	226	175	183	170	170	172	178	190	190
AgMRJ22	Soure, Pará	0° 43' 26"S, 48° 29' 24"W	174	174	155	155	173	173	159	159	131	129	165	165	246	274	174	174	237	245	152	152	167	173	237	237	108	108	212	192	121	121					203	207			181	181	184	184			190	190
AgMRJ23	Soure, Pará	0° 43' 26"S, 48° 29' 24"W	174	176	155	155	175	173	159	159	131	129	157	159	246	246	178	178	237	241	152	150	155	167	237	239	117	105	192	188	121	121			138	138	209	221	226	226	179	181	176	184			190	190
AgMRJ24	Soure, Pará	0° 43' 26"S, 48° 29' 24"W	174	176	155	155	177	177	159	159	133	131	157	165	248	254	178	178	235	245	150	150	167	167	239	239	108	105	222	202	121	121	209	211	138	138	201	203	226	226	181	183	170	170	172	182	190	190
AgMRJ25	Soure, Pará	0° 43' 26"S, 48° 29' 24"W	174	172	155	155	173	175	159	159	131	123	159	159	244	286	178	178	243	251	152	152	161	167	237	237	105	105	199	192	121	121	211	211	138	138	201	221	222	226	175	185	170	172	166	172	190	190
AgMRJ26	Soure, Pará	0° 43' 26"S, 48° 29' 24"W	174	180	155	161	175	173	159	157	131	129	159	171	248	296	178	178	243	245	152	150	167	167	239	239	111	105	194	188	125	121			138	138	201	201	224	226	175	183	170	176	178	178	190	190
AgMRJ27	Soure, Pará	0° 43' 26"S, 48° 29' 24"W	174	166	155	155	175	173	159	159	131	129	167	167	248	248	178	178	243	245	152	150	161	167	237	239	105	105	224	204	121	121			138	138	201	207	226	226	181	189	170	184	178	178	190	190
AgMRJ29	Soure, Pará	0° 43' 26"S, 48° 29' 24"W	174	176	155	161	173	173	159	159	131	131	159	159	254	278	178	178	237	245	152	152	161	167	237	239	117	105	220	192	121	121					201	221	224	226	169	187	170	170	172	182	190	190
AgMRJ30	Soure, Pará	0° 43' 26"S, 48° 29' 24"W	174	174	155	161	173	173	159	161	137	133	159	171	244	244	178	178	241	243	152	152	155	167	237	237	105	105	208	194	121	121			138	138	201	223	224	226	175	183	170	170	172	180	190	190
AgMRJ31	Soure, Pará	0° 43' 26"S, 48° 29' 24"W	174	174	155	155	173	173	157	157	131	131	157	159	244	254	178	178	237	239	152	152	161	167	237	239	111	108	204	190	121	121					203	207	226	226	169	171	172	172	172	172	190	190
AgMRJ32	Soure, Pará	0° 43' 26"S, 48° 29' 24"W	174	176			173	173	159	159	133	131	157	165	246	248	178	178	237	243	146	146	155	167	237	237	105	105	218	198	121	117					201	203	224	226	181	201	170	172	172	176	190	190
AgMRJ33	Soure, Pará	0° 43' 26"S, 48° 29' 24"W	174	176	155	155	173	173	157	159	135	123	159	171	252	254	178	178	237	243	146	146	167	167	237	239	105	105	214	208	121	121	211	211	138	138	201	203	224	226	181	183	170	172	172	182	190	190
AgMRJ34	Soure, Pará	0° 43' 26"S, 48° 29' 24"W	174	174	155	155	173	173	159	159	133	133	165	167	252	278	178	178	243	247	150	152	173	167	237	239	120	105	204	188	121	121	207	211	138	138	201	203	226	226	175	191	170	170	178	182	190	190
AgMRJ35	Soure, Pará	0° 43' 26"S, 48° 29' 24"W	174	172	155	155	175	173	157	159	131	127	173	173	256	258	174	174	243	237	152	152	167	167	237	237	105	105	222	188	121	121	209	211	138	138	221	221	226	226	175	203	170	172	172	172	190	190
AgMRJ36	Soure, Pará	0° 43' 26"S, 48° 29' 24"W	174	174	155	155	173	173	159	159	131	129	173	159	248	256	178	178	243	243	150	150	167	167	239	239	108	105	202	192	121	121	205	209	138	138	203	203			183	187	170	172	172	182	190	190
AgMRJ37	Soure, Pará	0° 43' 26"S, 48° 29' 24"W	176	166	155	155	173	173	159	159	131	127	159	159			178	178	239	245	152	152	161	167	239	239	105	105	206	204	121	121	209	211	138	138	203	203	224	226	169	187	170	170	170	182	190	190
AgMRJ38	Soure, Pará	0° 43' 26"S, 48° 29' 24"W	174	174	155	161	173	173	159	159	137	135	165	173	244	256	174	178	243	249	152	152	161	155	237	237	108	105	196	184	121	121	209	215	138	138	203	221	224	226	181	183	170	170	166	178	190	190
AgPAa01	Bragança, Pará	0° 54' 17"S, 46° 41' 15"W	172	170	161	161	173	173	159	157	133	133	161	167	244	268	174	174	239	251	148	148	167	167	237	239	114	105	194	190					140	140	201	203	226	226	175	175	170	170	172	172	190	190
AgPAa02	Bragança, Pará	0° 54' 17"S, 46° 41' 15"W	174	176	161	155	175	173	159	157	131	125	167	171	242	244	174	178	245	249	148	152	155	167	237	239	108	105	210	196	121	121	209	211	138	138	199	201	226	228	183	191	184	186	170	180	190	190
AgPAa03	Bragança, Pará	0° 54' 17"S, 46° 41' 15"W	174	176	161	161	175	173	159	159	137	131	167	161	244	286	174	178	245	245	148	148	161	167	237	237	105	105	188	188	121	121	209	209	138	138	199	199	226	226	175	203	170	176	172	178	190	190
AgPAa04	Bragança, Pará	0° 54' 17"S, 46° 41' 15"W	176	170	161	161	173	173	159	159	133	135	161	169	242	244	174	174	243	249	148	148	167	167	237	237	111	105	190	188	121	121	209	209	138	138	199	199	226	228	175	181	170	170	172	172	190	190
AgPAa05	Bragança, Pará	0° 54' 17"S, 46° 41' 15"W	176	170	161	161	173	173	159	159	129	129	167	167	268	278	174	178	243	249	148	150	167	167	237	237	105	105	210	190					138	138	199	203	226	228	175	175	170	176	172	182	190	190
AgPAa06	Bragança, Pará	0° 54' 17"S, 46° 41' 15"W	176	170	161	161	173	173	159	159	135	139	167	167	244	244	174	174	239	239	148	148	167	167	237	237	108	105	196	188							199	203	226	226	175	175	170	170	172	178	190	190
AgPAa07	Bragança, Pará	0° 54' 17"S, 46° 41' 15"W	170	170	161	161	173	173	159	159	135	131	161	165	244	244	174	174	237	247	148	148	167	167	237	237	108	105	190	188	121	121	209	209	138	138	199	199	226	228	175	183	170	172	172	174	190	190
AgPAa08	Bragança, Pará	0° 54' 17"S, 46° 41' 15"W	174	176	161	161	173	173	159	159	133	135	167	167	244	244	174	174	237	249	148	152	167	167	237	237	108	108	188	184			207	209			199	199	224	228	175	175	170	170	172	176	190	190
AgPAa09	Bragança, Pará	0° 54' 17"S, 46° 41' 15"W	176	176	161	161	173	173	159	159	135	135	161	167	242	244	178	178	237	237	148	148	161	167	237	239	105	105	198	184	121	121	209	209			203	207	226	228	176	187	170	170			190	190
AgPAa10	Bragança, Pará	0° 54' 17"S, 46° 41' 15"W	176	166	161	161	173	173	159	159	133	121	167	167	242	244	174	174	249	245	148	148	167	167	237	239	111	105	196	190			209	209	140	140	199	199	226	228	175	175	170	170	172	172	190	190
AgPAa11	Bragança, Pará	0° 54' 17"S, 46° 41' 15"W	170	172	161	161	173	173	159	159	133	125	167	167	244	250	174	174	245	239	148	148	167	167	237	237	105	105	188	186	121	121	209	209	138	140	199	201	226	228	175	175	170	170	172	172	190	190
AgPAa12	Bragança, Pará	0° 54' 17"S, 46° 41' 15"W	170	172	161	161	173	173	159	159	133	133	161	167	244	296	174	174	245	243	148	148	167	167	237	237	111	105	192	174	121	121	209	209	138	138	199	203	226	228	175	175	170	170	172	178	190	190
AgPAa13	Bragança, Pará	0° 54' 17"S, 46° 41' 15"W	170	176	161	161	173	173	159	157	135	133	167	167	244	278	174	174	243	239	148	148	167	167	237	237	111	105	190	184			207	209	138	140	207	207	226	228	175	176	170	170	172	172	190	190
AgPAa14	Bragança, Pará	0° 54' 17"S, 46° 41' 15"W	170	174	161	161	173	173	159	159	137	135	167	167	244	244	174	174	237	249	148	148	167	167	237	239	105	105	198	192	121	121	209	209	138	140	199	201	224	226	175	185	170	184	172	178	190	190
AgPAa15	Bragança, Pará	0° 54' 17"S, 46° 41' 15"W	176	176	161	161	173	173	159	159	133	125	167	167	242	244	174	174	251	245	148	148	167	167	237	237	105	102	190	186			209	211	138	140	199	199	224	228	176	187	170	170	172	174	190	190
AgPAa16	Bragança, Pará	0° 54' 17"S, 46° 41' 15"W	176	176	161	161	173	173	159	159	135	133	167	167	244	244	174	174	239	249	148	148	167	167	237	237	111	105	188	188							199	219	226	228	175	175	170	170	172	180	190	190
AgPAa17	Bragança, Pará	0° 54' 17"S, 46° 41' 15"W	170	176	161	161	173	173	159	157	135	125	167	171	244	246	174	174	245	245	148	148	167	167	237	237	105	105	196	190			217	217	138	140	199	201	226	226	175	175	170	170			190	190
AgPAa18	Bragança, Pará	0° 54' 17"S, 46° 41' 15"W	170	176	161	161	173	173	159	159	135	125	167	167	244	244	178	178	249	249	148	148	161	167	237	237	105	105	188	188			209	211	138	140	199	199	226	228	175	185	170	170	172	174	190	190
AgPAa19	Bragança, Pará	0° 54' 17"S, 46° 41' 15"W	166	172	161	161	173	173	159	157	135	123	167	167	244	286	178	174	241	249	148	148	167	167	237	237	108	108	198	192	121	121	209	209	138	138	203	203	226	228	176	176	170	184	172	172	190	190
AgPAa20	Bragança, Pará	0° 54' 17"S, 46° 41' 15"W	170	170	161	161	175	173	159	159	137	135	167	167	244	244	178	174	243	249	148	148	167	167	237	237	108	108	196	188	121	121	207	209	140	140	199	199	226	228	185	193	170	184	172	172	190	190
AgPAa21	Bragança, Pará	0° 54' 17"S, 46° 41' 15"W	170	170	161	161	173	173	159	159	137	135	165	167	244	244	178	174	245	245	148	148	167	167	237	237	105	105	196	188			209	211	138	140	199	199	226	228	176	176	170	184	170	182	190	190
AgPAa22	Bragança, Pará	0° 54' 17"S, 46° 41' 15"W	176	176	161	161	173	173	157	157	129	129	167	167	242	242	174	174	249	249	152	148	167	167	237	237	105	105	192	184			209	209	138	140	199	203	226	226	175	175	170	170	178	182	190	190
AgPAa23	Bragança, Pará	0° 54' 17"S, 46° 41' 15"W	176	176	161	161	173	173	159	159	135	123	167	171	244	246	174	174	245	245	148	148	167	167	237	239	105	105	198	188			209	209			199	201	226	226	175	175	170	170	178	180	190	190
AgPAa24	Bragança, Pará	0° 54' 17"S, 46° 41' 15"W	170	166	161	161	173	173	159	159	131	129	161	167	244	246	178	174	245	249	148	148	167	167	237	239	111	105	188	188	121	121	205	211	138	140	199	199	226	228	175	187	170	170	176	178	190	190
AgPAa25	Bragança, Pará	0° 54' 17"S, 46° 41' 15"W	170	166	161	161	173	173	159	159	131	129	167	169	246	284	178	174	245	247	148	148	167	167	237	237	111	105	198	188			209	211			199	199	226	226	176	191	170	172	178	182	190	190
AgPAa26	Bragança, Pará	0° 54' 17"S, 46° 41' 15"W	176	176	161	161	173	173	159	159	133	115	167	167	242	242	178	174	245	245	152	148	167	167	237	237	105	105	216	184	121	121	211	211	138	140	199	207	226	226	189	189	170	170	170	172	190	190
AgPAa27	Bragança, Pará	0° 54' 17"S, 46° 41' 15"W	170	166	161	161	173	173	159	159	131	129	167	167	244	286	178	174	245	249	148	148	167	167	237	237	111	105	198	188			209	211			199	199	226	230	176	191	170	172	178	182	190	190
AgPAa28	Bragança, Pará	0° 54' 17"S, 46° 41' 15"W	170	172	161	161	173	173	159	161	135	133	167	167	244	256	178	174	245	249	148	148	167	167	237	237	108	105	204	196					138	140	199	199	226	228	195	195	170	170	172	178	190	190
AgPAb01	Bragança, Pará	0° 56' 21"S, 46° 43'17"W	170	176	155	155	175	173	159	157	129	129	167	167			178	174	241	245	152	150	167	167	237	239	111	105	190	184					138	138	199	201	226	226			170	176	172	172	190	190
AgPAb02	Bragança, Pará	0° 56' 21"S, 46° 43'17"W	172	176	155	155	173	173	159	157	135	125	159	161	286	244	176	178	237	245	148	150	167	167			105	108	200	194			211	211	136	138	205	205	224	224	185	185	182	184	172	174	190	190
AgPAb03	Bragança, Pará	0° 56' 21"S, 46° 43'17"W	174	174	161	155	173	173	159	159	133	125	159	171	248	244	178	174	245	245	150	152	167	167	237	239	105	105	198	194	121	121	211	211	138	138	205	219	226	226	175	175	172	176	172	172	190	190
AgPAb04	Bragança, Pará	0° 56' 21"S, 46° 43'17"W	172	176	161	155	173	173	159	159	131	129	159	171			178	178	245	245	152	152	167	167	237	237	108	105	196	196	125	125			138	138	201	203			175	183	170	170	172	182	190	190
AgPAb05	Bragança, Pará	0° 56' 21"S, 46° 43'17"W	172	168	161	155	173	173	157	157	135	125	161	169	246	280	178	180	245	245	152	152	167	167	237	239	105	105	202	200	121	121			138	138	203	203	226	228	169	175	176	176	172	182	190	190
AgPAb06	Bragança, Pará	0° 56' 21"S, 46° 43'17"W	172	174	161	155	173	173	159	159	137	129	171	171	244	244	174	178	245	245	150	150	167	167	237	237	108	105	210	196	121	121	209	211	136	138	203	207	226	226	175	183	170	172	166	172	190	190
AgPAb07	Bragança, Pará	0° 56' 21"S, 46° 43'17"W	172	172	155	161	173	173	159	159	123	131			246	248	174	178	241	249	152	152	167	167	237	237	105	105	202	184					138	138	203	219	226	226	175	175	176	176	166	180	190	190
AgPAb08	Bragança, Pará	0° 56' 21"S, 46° 43'17"W	172	170	161	155	175	173	159	159	135	133	171	173	268	282	174	178	245	245	152	152	167	167	237	237	117	105	200	194			209	213	138	138	219	219	226	226	175	185	176	184	172	172	190	190
AgPAb09	Bragança, Pará	0° 56' 21"S, 46° 43'17"W	172	174	161	161	175	173	159	159	129	125	159	167	244	284	178	178	245	239	150	150	167	167	237	239	108	105	194	184	121	121	205	211	138	138	203	207	226	226	183	183	170	184	172	172	190	190
AgPAb10	Bragança, Pará	0° 56' 21"S, 46° 43'17"W	172	174	155	155	173	173	159	157	129	125	167	173	244	254	178	178	245	245	152	152	167	167	237	239	108	105	200	184	121	121	209	211	138	138	203	203	224	226	175	175	170	176	172	176	190	190
AgPAb11	Bragança, Pará	0° 56' 21"S, 46° 43'17"W	172	170	155	161	175	173	159	159	129	135	167	173	242	248	178	178	245	245	150	152	167	167	237	239	105	105	212	212			207	211	138	138	207	219	224	226	175	193	170	184	172	180	190	190
AgPAb12	Bragança, Pará	0° 56' 21"S, 46° 43'17"W	170	170	155	161	173	173	159	159	135	125	171	173	254	270	178	178	245	245	150	152	167	167	237	239	117	105	200	186	121	121			138	138	199	203	226	226	175	185	172	176	172	172	190	190
AgPAb13	Bragança, Pará	0° 56' 21"S, 46° 43'17"W	170	174	155	161	173	173	159	159	135	123	167	173	248	272	178	178	239	249	152	152	167	167	237	237	111	108	210	206	121	121	207	211	138	138	203	203	226	226	175	183	176	184	172	172	190	190
AgPAb14	Bragança, Pará	0° 56' 21"S, 46° 43'17"W	170	174	155	155	173	173	159	159	129	125	167	173	284	296	174	178	243	243	152	152	167	167	237	239	111	99	206	196	121	121	205	211	138	138	203	219	224	226	169	187	172	176	176	178	190	190
AgPAb15	Bragança, Pará	0° 56' 21"S, 46° 43'17"W	172	168	161	161	175	175	159	157	129	135	173	173	248	282	178	178	245	245	150	150	167	167	237	239	111	105	216	184	121	121	211	211	136	136	201	215	224	226	181	193	176	176	172	172	190	190
AgPAb16	Bragança, Pará	0° 56' 21"S, 46° 43'17"W	172	172	155	155	173	173	159	159	135	141	161	173	248	270	178	178	247	245	150	150	167	167	237	237	111	111	184	184	121	121	209	211	136	138	203	217	226	228	169	191	170	172	172	176	190	190
AgPAb17	Bragança, Pará	0° 56' 21"S, 46° 43'17"W	168	168	161	155	173	173	159	157	129	131	165	173	242	244	178	178	245	245	148	152	167	167	237	239	108	105	194	184	121	121			138	138	209	221	226	228	175	175	172	176	166	172	190	190
AgPAb18	Bragança, Pará	0° 56' 21"S, 46° 43'17"W	174	164	161	155	173	173	159	157	129	129	159	161	244	254	174	178	245	245	146	146	167	167	237	239	108	105	200	194	121	121			138	138	201	201	226	226	175	183	170	176	172	178	190	190
AgPAb19	Bragança, Pará	0° 56' 21"S, 46° 43'17"W	172	168	161	155	173	173	159	157	131	121	161	161	248	284	178	178	245	245	152	152	167	167	239	239	108	105	208	192	121	121	209	211	138	138	203	203	224	226	175	191	170	176	172	172	190	190
AgPAb20	Bragança, Pará	0° 56' 21"S, 46° 43'17"W	172	174	161	155	173	173	157	157	129	127	161	167			178	178	245	245	152	152	167	167	239	239	111	105	224	202	121	121	215	215	136	138					183	201	170	170	172	172	190	190
AgPAb21	Bragança, Pará	0° 56' 21"S, 46° 43'17"W	174	168	155	155	173	173	157	157	131	127	165	173	244	268	178	178	245	245	152	152	167	167	237	239	111	108	218	190	121	121			136	140	201	201	226	226	183	183	170	172	172	172	190	190
AgPAb22	Bragança, Pará	0° 56' 21"S, 46° 43'17"W	172	164	155	161	175	173	157	157	129	133	167	169	248	286	178	178	245	247	150	150	167	167	237	239	111	108	220	184	121	121	209	211	138	138	201	203	226	226			184	184	172	174	190	190
AgPAb23	Bragança, Pará	0° 56' 21"S, 46° 43'17"W	174	174	155	161	173	173	159	157	129	135	173	173	248	284	178	178	249	249	152	152	167	167	237	239	111	111	206	206	121	121	207	209	138	138	199	201	226	226			184	184	172	188	190	190
AgPAb24	Bragança, Pará	0° 56' 21"S, 46° 43'17"W	174	170	155	155	175	173	159	157	123	125	167	167	244	284	178	178	247	249	150	150	161	167	237	237	108	105	190	190	121	117	211	211	138	138	203	215	226	226			170	184	172	180	190	190
AgPAb25	Bragança, Pará	0° 56' 21"S, 46° 43'17"W	170	170	155	155	173	173	159	157	129	129	161	161	242	244	178	178	245	241	152	152	167	167	237	237	111	105	198	186	121	121	207	211	138	138	201	203	224	226			170	184	172	198	190	190
AgPAb26	Bragança, Pará	0° 56' 21"S, 46° 43'17"W	174	168	161	161	173	173	159	157	129	135	167	167	244	244	174	174	245	247	148	148	167	167	237	237	114	105	218	188	121	121	209	211	138	138	199	205	226	228	175	185	170	170	172	178	190	190
AgPAb27	Bragança, Pará	0° 56' 21"S, 46° 43'17"W	170	174	161	161	173	173	157	159	127	135	165	167	244	244	178	178	237	237	150	150	167	167	237	237	105	108	196	196					138	138			226	226	183	185	184	184	172	178	190	190
AgTMD01	Tamandaré, Pernambuco	8° 31' 35"S, 35° 0' 48"W	174	174	155	155	173	173	159	159	129	129	163	163	284	284	178	178	245	245	150	150	167	167	237	237	111	111	198	198			207	207	138	138	201	201	226	226	169	169					190	190
AgTMD02	Tamandaré, Pernambuco	8° 31' 35"S, 35° 0' 48"W	174	174	155	155	173	173	159	159	129	129	163	163	284	284	178	178	245	245	150	150	167	167	237	237	111	111	198	198	113	117	207	207	138	138	201	201	226	226	169	169	170	170			190	190
AgTMD03	Tamandaré, Pernambuco	8° 31' 35"S, 35° 0' 48"W	174	174	155	155	173	173	159	159	129	129	163	163	284	284	178	178	245	245	150	150	167	167	237	237	111	111	198	202	113	113	207	207	138	138	201	201	226	226	169	169	170	170			190	190
AgTMD04	Tamandaré, Pernambuco	8° 31' 35"S, 35° 0' 48"W	174	174	155	155	173	173	159	159	129	129	163	163	284	284	178	178	245	245	150	150	167	167	237	237	111	111	198	198	113	113	207	207	138	138	201	201	226	226	169	169	170	170			190	190
AgTMD05	Tamandaré, Pernambuco	8° 31' 35"S, 35° 0' 48"W	174	174	155	155	173	173			129	129	163	163	284	284	178	178	245	245	150	150	167	167	237	237	111	111	202	202	113	117	207	207	138	138	201	201	226	226	169	169	170	170	180	180	190	190
AgTMD06	Tamandaré, Pernambuco	8° 31' 35"S, 35° 0' 48"W	174	174	155	155	173	173	159	159	129	129	163	163	284	284	178	178	245	245	150	150	167	167	237	237	111	111	198	198	113	113	207	207	138	138	201	201	226	226	169	169	170	170	180	180	190	190
AgTMD07	Tamandaré, Pernambuco	8° 31' 35"S, 35° 0' 48"W	174	174	155	155	173	173	159	159	129	129	163	163	284	284	178	178	245	245	150	150	167	167	237	237	111	111	198	198	113	113	207	207	138	138	201	201	226	226	169	173	170	170	180	180	190	190
AgTMD08	Tamandaré, Pernambuco	8° 31' 35"S, 35° 0' 48"W	174	174	155	155	173	173	159	159	129	129	163	163	284	284	178	178	245	245	150	150	167	167	237	237	111	111	198	200			207	207	138	138	201	201	226	226	169	169			180	180	190	190
AgTMD09	Tamandaré, Pernambuco	8° 31' 35"S, 35° 0' 48"W	174	174	155	155	173	173			129	129	163	163	284	284	178	178	245	245	150	150	167	167	237	237	111	111	198	198	113	113	207	207	138	138	201	201	226	226	169	169	170	170			190	190
AgTMD10	Tamandaré, Pernambuco	8° 31' 35"S, 35° 0' 48"W	174	174	155	155	173	173	159	159	129	129	163	163	284	284	178	178	245	245	150	150	167	167	237	237	111	111	202	202	113	113	207	207	138	138	201	201	226	226	169	169	170	170			190	190
AgTMD11	Tamandaré, Pernambuco	8° 31' 35"S, 35° 0' 48"W	174	174	155	155	173	173	159	159	129	129	163	163	284	284	178	178	245	245	150	150	167	167	237	237	111	111	198	198	113	113	207	207	138	138	201	201	226	226	169	169	172	172			190	190
AgTMD12	Tamandaré, Pernambuco	8° 31' 35"S, 35° 0' 48"W	174	174	155	155	173	173	159	159	129	129	163	163	284	284	178	178	245	249	150	150	167	167	237	237	111	111	198	198			207	207	138	138	201	201	226	226	169	169					190	190
AgTMD13	Tamandaré, Pernambuco	8° 31' 35"S, 35° 0' 48"W	174	174	155	155	173	173	159	159	129	129	163	163	284	284	178	178	245	249	150	150	167	167	237	237	111	111	198	198			207	207	138	138	201	201	226	226	169	169	170	170			190	190
AgTMD14	Tamandaré, Pernambuco	8° 31' 35"S, 35° 0' 48"W	174	174	155	155	173	173	159	159	129	129	163	163	284	284	178	178	245	245	150	150	167	167	237	237	111	111	204	204	117	117	207	207	138	138	201	201	226	226	169	169	170	170			190	190
AgTMD15	Tamandaré, Pernambuco	8° 31' 35"S, 35° 0' 48"W	174	174	155	155	173	173	159	159	129	129	163	163	284	284	178	178	245	245	150	150	167	167	237	237	111	111	202	202	113	117	207	207	138	138	201	201	226	226	169	169					190	190
AgTMD16	Tamandaré, Pernambuco	8° 31' 35"S, 35° 0' 48"W	174	174	155	155	173	173	159	159	129	129	163	163	284	284	178	178	245	245	150	150	167	167	237	237	111	111	198	198			207	207	138	138	201	201	226	226	169	173					190	190
AgTMD17	Tamandaré, Pernambuco	8° 31' 35"S, 35° 0' 48"W	174	174	155	155	173	173	159	159	129	129	163	163	284	284	178	178	245	245	150	150	167	167	237	237	111	111	198	198	113	113	207	207	138	138	201	201	226	226	169	169	170	170			190	190
AgTMD18	Tamandaré, Pernambuco	8° 31' 35"S, 35° 0' 48"W	174	174	155	155	173	173	159	159	129	129	163	163	284	284	178	178	245	245	150	150	167	167	237	237	111	111	198	198	113	113	207	207	138	138	201	201	226	226	169	169	170	170	180	180	190	190
AgTMD19	Tamandaré, Pernambuco	8° 31' 35"S, 35° 0' 48"W	174	174	155	155	173	173	159	159	129	129	163	163	284	284	178	178	249	249	150	150	167	167	237	237	111	111	198	200	117	117	207	207	138	138	201	201	226	226	169	169	170	170	180	180	190	190
AgTMD20	Tamandaré, Pernambuco	8° 31' 35"S, 35° 0' 48"W	174	174	155	155	173	173	159	159	129	129	163	163	284	284	178	178	245	245	150	150	167	167	237	237	111	111	198	198	113	117	207	207	138	138	201	201	226	226	169	169	170	170	180	180	190	190
AgTMD21	Tamandaré, Pernambuco	8° 31' 35"S, 35° 0' 48"W	174	174	155	155	173	173	159	159	129	129	163	163	284	284	178	178	245	245	150	150	167	167	237	237	111	111	198	198	113	113	207	207	138	138	201	201	226	226	169	169	170	170	180	180	190	190
AgTMD22	Tamandaré, Pernambuco	8° 31' 35"S, 35° 0' 48"W	174	174	155	155	173	173	159	159	129	129	163	163	284	284	178	178	245	245	150	150	167	167	237	237	111	111	198	200	113	113	207	207	138	138	201	201	226	226	169	169	170	170	182	182	190	190
AgTMD23	Tamandaré, Pernambuco	8° 31' 35"S, 35° 0' 48"W	174	174	155	155	173	173	159	159	129	129	163	163	284	284	178	178	245	245	150	150	167	167	237	237	111	111	202	202	113	113	207	207	138	138	201	201	226	226	169	169	170	170	178	178	190	190
AgTMD24	Tamandaré, Pernambuco	8° 31' 35"S, 35° 0' 48"W	174	174	155	155	173	173	159	159	129	129	163	163	284	284	178	178	245	245	150	150	167	167	237	237	111	111	198	198	113	117	207	207	138	138	201	201	226	226	169	169	170	170	180	180	190	190
AgTMD25	Tamandaré, Pernambuco	8° 31' 35"S, 35° 0' 48"W	174	174	155	155	173	173	159	159	129	129	163	163	284	284	178	178	245	245	150	150	167	167	237	237	111	111	198	198	113	113	207	207	138	138	201	201	226	226	169	169	170	170	180	180	190	190
AgTMD26	Tamandaré, Pernambuco	8° 31' 35"S, 35° 0' 48"W	174	174	155	155	173	173	159	159	129	129	163	163	284	284	178	178	245	245	150	150	167	167	237	237	111	111	198	198			207	207	138	138	201	201	226	226	169	169	170	170	178	180	190	190
AgTMD27	Tamandaré, Pernambuco	8° 31' 35"S, 35° 0' 48"W	174	174	155	155	173	173	159	159	131	131	163	163	282	282	178	178	245	245	150	150	167	167	237	237	111	111	198	198	113	113	207	207	138	138	201	201	226	226	169	169	172	172	178	178	190	190
AgTMD28	Tamandaré, Pernambuco	8° 31' 35"S, 35° 0' 48"W	174	174	155	155	173	173	159	159	131	131	163	163	282	282	178	178	245	245	150	150	167	167	237	237	111	111	198	198	113	113	207	207	138	138	201	201	226	226	169	173	172	172	178	178	190	190
AgTMD29	Tamandaré, Pernambuco	8° 31' 35"S, 35° 0' 48"W	174	174	155	155	173	173	159	159	131	131	163	163	282	282	178	178	245	245	150	150	167	167	237	237	111	111	198	198	113	113	207	207	138	138	201	201	226	226	169	169	172	172	178	178	190	190
AgTMD30	Tamandaré, Pernambuco	8° 31' 35"S, 35° 0' 48"W	174	174	155	155	173	173	159	159	131	131	163	163	282	282	178	178	245	245	150	150	167	167	237	237	111	111	198	198	113	113	207	207	138	138	201	201	226	226	169	169	172	172	178	178	190	190
AgTMD31	Tamandaré, Pernambuco	8° 31' 35"S, 35° 0' 48"W	174	174	155	155	173	173	159	159	131	131	163	163	282	282	178	178	245	245	150	150	167	167	237	237	111	111	198	198			207	207	138	138	201	201	226	226	169	169	172	172	178	178	190	190
AgTMD32	Tamandaré, Pernambuco	8° 31' 35"S, 35° 0' 48"W	174	174	155	155	173	173	159	159	131	131	163	163	282	282	178	178	245	245	150	150	167	167	237	237	111	111	198	198			207	207	138	138	201	201	226	226	169	169			178	178	190	190
AgPNB01	Parnaíba, Piauí	2° 46' 42"S, 41° 49' 20"W			161	161	173	173	157	159	125	125	165	167	282	286	178	178	245	247	152	152	167	167	237	239	105	123	184	184	117	121	207	209	136	136	201	201	222	228	175	175	174	174	172	172	190	190
AgPNB02	Parnaíba, Piauí	2° 46' 42"S, 41° 49' 20"W	176	176	161	161	173	173	159	159	123	125	165	167	280	280	178	178	247	247	152	152	167	167	239	239	108	108	184	184	121	121	207	207	136	136	201	203	222	226	175	175	176	176	172	172	190	190
AgPNB03	Parnaíba, Piauí	2° 46' 42"S, 41° 49' 20"W	176	176	161	161	173	173	159	159	125	137	153	165	270	280	178	178	245	245	152	152	167	167	237	239	105	111	192	196	121	121	209	209	136	136	199	201	226	226	175	175	176	176	172	172	190	190
AgPNB04	Parnaíba, Piauí	2° 46' 42"S, 41° 49' 20"W	176	176	161	161	173	173	159	159	123	125	165	171	282	290	178	178	245	245	152	152	167	167	237	239	105	123	184	184	117	121	207	209	136	136	203	203	226	226	175	183	170	176	172	172	190	190
AgPNB05	Parnaíba, Piauí	2° 46' 42"S, 41° 49' 20"W	176	176	161	161	173	173	159	159	123	123	167	167			178	178	245	245	152	152	167	167	237	239	105	123	184	184	121	121	207	207			201	201	226	226	175	175	170	176	172	172	190	190
AgPNB06	Parnaíba, Piauí	2° 46' 42"S, 41° 49' 20"W	170	176	161	161	173	173	159	159	123	123	165	165	282	282	178	178	245	245	150	150	167	167	239	239	111	111	184	184	121	121	207	207	138	138	203	203	226	226	175	175	170	176	172	172	190	190
AgPNB07	Parnaíba, Piauí	2° 46' 42"S, 41° 49' 20"W	174	174	161	161	173	173	159	159	125	125	165	165			178	178	245	245	152	152	167	167	239	239	105	105	184	184			205	207	138	138	203	203	226	226	175	175	176	176	172	172	190	190
AgPNB08	Parnaíba, Piauí	2° 46' 42"S, 41° 49' 20"W	176	176	161	161	173	173	159	159	123	123	163	165	280	284	178	178	245	245	152	152	167	167	239	239	105	105	184	186	121	121	207	207	136	136	201	203	226	226	175	175	176	184	172	172	190	190
AgPNB09	Parnaíba, Piauí	2° 46' 42"S, 41° 49' 20"W	170	176	161	161	173	173	157	159	123	129	165	167	280	280	178	178	245	247	152	152	167	167	239	239	108	123	184	184	121	121	209	209	136	138	201	201	226	226	175	175	176	178	172	172	190	190
AgPNB10	Parnaíba, Piauí	2° 46' 42"S, 41° 49' 20"W	176	176	161	161	173	173	159	159	123	123	163	165	280	282	178	178	245	245	148	152	167	167	239	239			184	186	121	121	209	213	136	138	201	203	226	226	175	181	176	176	170	172	190	190
AgPNB11	Parnaíba, Piauí	2° 46' 42"S, 41° 49' 20"W	176	176	161	161	173	173	159	159	123	123	165	167	282	282	178	178	245	271	152	152	167	167	237	237	105	111	184	184	121	121	205	205	138	138	203	203	226	226	175	175	174	176	172	172	190	190
AgPNB12	Parnaíba, Piauí	2° 46' 42"S, 41° 49' 20"W	176	176	161	161	173	173	159	159	123	125	165	167	278	282	178	178	245	245	152	152	167	167	239	239			184	184	121	121	207	209	136	138	201	203	226	226	175	175	172	176	172	172	190	190
AgPNB13	Parnaíba, Piauí	2° 46' 42"S, 41° 49' 20"W	170	170	161	161	173	173	157	157	123	123	169	171	280	282	178	178	247	251	152	152	167	167	237	239			184	184			207	207			203	203	226	226	173	175					190	190
AgPNB14	Parnaíba, Piauí	2° 46' 42"S, 41° 49' 20"W	176	176	161	161	173	173	157	159	123	123	165	165	280	292	178	178	247	247	152	152	167	167	237	239	105	123	184	184	121	121	207	207	136	136	201	203	226	226	175	175	176	176			190	190
AgPNB15	Parnaíba, Piauí	2° 46' 42"S, 41° 49' 20"W	176	176	161	161	173	173	159	159	123	123	163	165	282	282	178	178	247	247	152	152	167	167	237	239			184	184	117	121	207	209	138	138	201	203	226	226	175	181	170	170	172	172	190	190
AgPNB16	Parnaíba, Piauí	2° 46' 42"S, 41° 49' 20"W	176	176	161	161	173	173	159	159	125	125	165	165	280	280	178	178	245	271	152	152	167	167	239	239	111	111	184	184	117	117	207	209	136	136	201	201	226	226	175	175	176	176	172	172	190	190
AgPNB17	Parnaíba, Piauí	2° 46' 42"S, 41° 49' 20"W	170	176	161	161	173	173	159	159	125	129	165	165	284	288	178	178	245	245	152	152	167	167	239	239	111	123	184	186	117	121	209	209	136	138	201	203	222	226	175	175	170	176	172	172	190	190
AgPNB18	Parnaíba, Piauí	2° 46' 42"S, 41° 49' 20"W	170	170	161	161	173	173	159	159	123	123	163	165	276	280	178	178	247	247	152	152	167	167	239	239	105	105	184	184	121	121	207	209	136	136	201	203	226	226	175	175	176	176	172	172	190	190
AgPNB19	Parnaíba, Piauí	2° 46' 42"S, 41° 49' 20"W	176	176	161	161	173	173	159	159	123	123	163	165	282	282	178	178	245	245	148	148	167	167	239	239	105	123	184	184	121	121	205	207	136	138	203	203	226	226	175	175	178	178	172	172	190	190
AgPNB20	Parnaíba, Piauí	2° 46' 42"S, 41° 49' 20"W	170	176	161	163	173	173	159	159	125	129	163	165	280	284	178	178	245	245	152	152	167	167	237	239			184	186			205	209	136	136	201	203	226	226	175	175	174	178	172	172	190	190
AgPNB21	Parnaíba, Piauí	2° 46' 42"S, 41° 49' 20"W	176	176	161	161	173	173	159	159	123	125	163	163			178	178	245	245	152	152	167	167	237	239	105	105	184	184	121	121	205	205			203	203	226	226	175	175	172	176	172	172	190	190
AgPNB22	Parnaíba, Piauí	2° 46' 42"S, 41° 49' 20"W	176	176	161	161	173	173	159	159	123	125	165	165	280	284	178	178	245	245	152	152	167	167	237	237	123	123	184	184	121	121	207	207	138	138	203	203	226	226	175	175	176	176	172	172	190	190
AgPNB23	Parnaíba, Piauí	2° 46' 42"S, 41° 49' 20"W	170	176	161	161	173	173	159	159	123	125	165	165	284	284	178	178	245	247	152	152	167	167	239	239	105	111	184	184	117	121	205	207	136	138	201	203	226	226	175	175	176	176	172	172	190	190
AgPNB24	Parnaíba, Piauí	2° 46' 42"S, 41° 49' 20"W	176	176	161	161	173	173	159	159	123	123	163	165	246	280	178	178	245	245	148	152	167	167	237	239	105	105	184	184	121	121	207	209	136	138	201	203	226	226	175	183	170	176	170	172	190	190
AgPNB25	Parnaíba, Piauí	2° 46' 42"S, 41° 49' 20"W	174	176	161	161	173	173	159	159	125	125	163	165	282	282	178	178	245	247	152	152	167	167	237	239	105	105	184	184	121	121	205	205	136	136	201	203	222	226	175	185	176	178	172	172	190	190
AgPNB26	Parnaíba, Piauí	2° 46' 42"S, 41° 49' 20"W	176	178	161	161	173	173	157	159	123	125	163	165	280	284	178	178	245	251	152	152	167	167	237	239	111	123	176	184	121	121	205	207			201	203	226	226	175	175	176	176	172	172	190	190
AgPNB27	Parnaíba, Piauí	2° 46' 42"S, 41° 49' 20"W	170	176	161	161	173	173	159	159	123	125	169	171	282	282	178	178	245	245	152	152	167	167	237	239	105	123	184	184	121	121	207	211	136	138	203	203	226	226	175	181	174	184	172	172	190	190
AgPNB28	Parnaíba, Piauí	2° 46' 42"S, 41° 49' 20"W	176	176	161	161	173	173	159	159	123	123	163	163	280	290	178	178	245	245	152	152	167	167	237	239	105	105	184	184	117	121	205	207	138	138	203	203	226	226	175	175	174	176	172	172	190	190
AgPNB29	Parnaíba, Piauí	2° 46' 42"S, 41° 49' 20"W	174	176	161	161	173	173	157	159	125	129	165	167	282	284	178	178	245	245	150	152	167	167	239	239	108	111	184	186	121	121					201	203	226	226	175	175	176	176	172	172	190	190
AgPRC03	Paracuru, Ceará	3° 24' 47"S, 39° 3' 23"W	174	176	161	161	173	173	159	159			163	165	248	282	178	178			148	150	167	167	237	237	105	105					209	211			203	203	226	230	169	169	176	176			190	190
AgPRC04	Paracuru, Ceará	3° 24' 47"S, 39° 3' 23"W	174	174	161	161	173	173	159	159	135	135	163	163	270	282	174	174	245	247	150	150	167	167	237	237	105	105	184	190	121	121			136	136	201	203			169	169	176	176	172	172	190	190
AgPRC06	Paracuru, Ceará	3° 24' 47"S, 39° 3' 23"W	170	170	161	161	173	173	159	159	123	123	163	163	270	282	174	178	245	245	150	150	167	167	237	237	105	111	184	190	113	121					201	203	226	226	169	169	176	176			190	190
AgPRC08	Paracuru, Ceará	3° 24' 47"S, 39° 3' 23"W	170	176	161	161	173	173	159	159	123	125	163	165	270	282	178	178	245	245	148	152	167	167	237	237	105	111	184	190	113	113			148	150	209	209	226	228	169	176	176	176	176	186	190	190
AgPRC10	Paracuru, Ceará	3° 24' 47"S, 39° 3' 23"W	180	180	163	163	173	173	161	163	107	107	149	149	260	260	176	176	243	259	148	148	163	163	279	279	96	96	178	178	109	109	223	223	152	152	213	213	226	226	175	175	178	178	176	176	190	190

## Sheet: Aschaueriana
SampleID	Locality (City, state)	Geographic Coordinate	Aschau1-01		Aschau1-02		Aschau1-03		Aschau1-04		Aschau1-05		Aschau1-06		Aschau1-07		Aschau1-08		Aschau1-09		Agerm1-12		Agerm1-02		Agerm1-03		Agerm1-06		Agerm1-07		Agerm1-08		Agerm1-14		Agerm1-15		Agerm1-19		Agerm1-22		T7		CTT01
AsAJU01	Bragança, Pará	0° 49' 12"S, 46° 36' 56"W	221	221	150	150	213	213	218	218	169	169	172	172	209	211	174	178	202	202	107	107	182	182	165	165	175	175	161	161	181	181	149	149	262	262	241	241	163	163	178	178	96	96
AsAJU02	Bragança, Pará	0° 49' 12"S, 46° 36' 56"W	223	223	148	150	231	231	218	218			172	172	211	213	174	174			107	107	182	182	169	169	175	175	161	161	181	181	149	149	262	262	241	241	163	163	178	178	96	96
AsAJU03	Bragança, Pará	0° 49' 12"S, 46° 36' 56"W	225	219	148	148	227	233	218	220	169	169	176	176	209	209	174	180	204	210	107	107	182	182	159	159	175	175	161	161	181	181	149	149	262	262	241	241	163	163	178	184	96	96
AsAJU04	Bragança, Pará	0° 49' 12"S, 46° 36' 56"W	221	223	148	148	215	227	220	222	169	169	172	172	211	211	174	178	200	214	107	107	182	182	165	169	175	175	161	161	181	181	149	149	262	262	241	241	163	163	178	178	96	96
AsAJU05	Bragança, Pará	0° 49' 12"S, 46° 36' 56"W	217	225	148	148	229	233	218	220	169	169	172	176	211	211	174	174	210	214	107	107	182	182	159	165	175	175	161	161	181	181	149	149	262	262	241	241	163	163	178	184	96	96
AsAJU06	Bragança, Pará	0° 49' 12"S, 46° 36' 56"W	219	219	148	148	227	229	218	220	169	179	172	172	211	211	174	174	200	200	107	107	182	182	165	165	175	175	161	161	181	181	149	149	262	262	243	243	163	163	178	184	96	96
AsAJU07	Bragança, Pará	0° 49' 12"S, 46° 36' 56"W	219	221	148	148	227	229	218	218	179	179	172	172	211	211	174	174	208	208	107	107	182	182	165	165	175	175	161	161	181	181	149	149	262	262	245	245	163	163	178	178	96	96
AsAJU08	Bragança, Pará	0° 49' 12"S, 46° 36' 56"W	223	223	148	148	231	231	218	218	169	169	172	176	209	211	174	174	200	200	107	107	182	182	165	165	175	175	161	161	181	181	149	149	262	262	241	241	163	163	178	178	96	96
AsAJU09	Bragança, Pará	0° 49' 12"S, 46° 36' 56"W	221	221	148	148	229	229	218	220	169	179	176	176	211	211	174	174	206	206	107	107	182	182	165	165	175	175	161	161	181	181	149	149	262	262	241	241	163	163	178	178	96	96
AsAJU10	Bragança, Pará	0° 49' 12"S, 46° 36' 56"W	217	219	148	148	229	233	218	220	169	169	172	172	209	211	174	178	206	206	107	107	182	182	165	165	175	175	161	161	181	181	149	149	262	262	241	241	163	163	178	184	96	96
AsAJU11	Bragança, Pará	0° 49' 12"S, 46° 36' 56"W	217	219	150	150	227	227	218	218	169	169	172	172	211	211	174	174	202	208	107	107	182	182	165	165	175	175	161	161	181	181	149	149	262	262	259	259	163	163	178	178	96	96
AsAJU14	Bragança, Pará	0° 49' 12"S, 46° 36' 56"W	215	221	148	150	213	229	218	218	169	169	176	172	209	209	174	174	210	210	107	107	182	182			175	175	161	161	181	181	149	149	262	262	241	241	163	163	178	178	96	96
AsAJU15	Bragança, Pará	0° 49' 12"S, 46° 36' 56"W	217	221	148	150	233	233	220	220	169	179	172	172	211	211	174	174	202	202	107	107	182	182	165	165	175	175	161	161	181	181	149	149	262	262	241	241	163	163	178	178	96	96
AsAJU16	Bragança, Pará	0° 49' 12"S, 46° 36' 56"W	219	223	148	150	227	231	218	220	179	179	172	172	209	209	174	174	200	200	107	107	182	182	165	165	175	175	161	161	181	181	149	149	262	262	241	241	163	163	178	178	96	96
AsAJU17	Bragança, Pará	0° 49' 12"S, 46° 36' 56"W	219	221	148	148	227	231	218	218			172	176	211	211	174	174	200	206	107	107	182	182	165	165	175	175	161	161	181	181	149	149	262	262	241	241	163	163	178	178	96	96
AsAJU19	Bragança, Pará	0° 49' 12"S, 46° 36' 56"W	219	219	148	148	215	231	218	218	169	169	172	172	209	211	174	174	214	214	107	107	182	182	165	165	175	175	161	161	181	181	149	149	262	262	241	241	163	163	178	178	96	96
AsAJU21	Bragança, Pará	0° 49' 12"S, 46° 36' 56"W	219	219	178	178	233	233	220	220	169	169	172	172	209	211	174	178	200	200	107	107	182	182	165	165	175	175	161	161	181	181	149	149	262	262	241	241	163	163	178	178	96	96
AsAJU22	Bragança, Pará	0° 49' 12"S, 46° 36' 56"W	219	219	148	150	229	231	220	220	169	169	172	172	209	209	174	174	206	206	107	107	182	184			175	175	161	161	181	181	149	149	262	262	241	241	163	163	178	178	96	96
AsAJU23	Bragança, Pará	0° 49' 12"S, 46° 36' 56"W	219	219	148	150	213	229	218	220	169	169	172	172	211	211	174	174	202	202	107	107	182	182			175	175	161	161	181	183	149	149	262	262	241	241	163	163	178	178	96	96
AsAJU24	Bragança, Pará	0° 49' 12"S, 46° 36' 56"W	219	219	148	150	229	231	218	220	169	179	172	172	209	211	174	174	200	200	107	107	182	182			175	175	161	161	181	183	149	149	262	262	241	241	163	163	178	178	96	96
AsAJU25	Bragança, Pará	0° 49' 12"S, 46° 36' 56"W	219	223	148	148	227	229	218	218	169	169	172	172	209	211	174	174	200	200	107	107	182	182	159	159	175	175	161	161	181	181	149	149	262	262	241	241	163	163	178	178	96	96
AsAJU26	Bragança, Pará	0° 49' 12"S, 46° 36' 56"W	219	219	148	148	229	237	218	218	179	179	172	172	211	211	174	178	200	206	107	107	182	182	159	165	175	175	161	161	181	181	149	149	262	262	241	241	163	163	178	178	96	96
AsAJU96	Bragança, Pará	0° 49' 12"S, 46° 36' 56"W	221	221	148	148	229	237	218	220	169	179	172	176	209	211	174	174	202	212	107	107	182	182	165	165	175	175	161	161	181	181	149	149	262	262	241	243	163	163	178	178	96	96
AsAJU97	Bragança, Pará	0° 49' 12"S, 46° 36' 56"W	219	223	150	150	213	227	218	218	169	169	172	176	209	211	174	174	202	208	107	107	182	182	165	165	175	175	161	161	181	181	149	149	262	262	259	259	163	163	178	178	96	96
AsAJU98	Bragança, Pará	0° 49' 12"S, 46° 36' 56"W	221	221	150	178	229	235	218	218	169	169	172	176	211	211	174	174	200	204	107	107	182	182	159	165	175	175	161	161	181	181	149	149	262	262	241	241	163	163	178	184	96	96
AsAJU99	Bragança, Pará	0° 49' 12"S, 46° 36' 56"W	219	223	148	148	231	231	218	220	169	179	176	176	209	211	174	176	202	202	107	107	182	182	165	165	175	175	161	161	181	181	149	149	262	262	259	259	163	163	178	178	96	96
AsAJU100	Bragança, Pará	0° 49' 12"S, 46° 36' 56"W	219	221	148	148	229	233	218	220	179	179	172	172	211	211	174	182	198	208	107	107	182	182	159	165	175	175	161	161	181	181	149	149	262	262	241	241	163	163	178	184	96	96
AsAJU101	Bragança, Pará	0° 49' 12"S, 46° 36' 56"W	221	221	150	176	231	235	218	218	169	169	172	176	211	211	174	174	204	204	107	107	182	182	159	165	175	175	161	161	181	181	149	149	262	262	241	241	163	163	184	184	96	96
AsAJU102	Bragança, Pará	0° 49' 12"S, 46° 36' 56"W	219	225	138	150	231	231	218	220	187	187	172	172	211	211	174	174	210	210	107	107	182	182	159	165	175	175	161	161	181	181	149	149	262	262	241	241	163	163	178	178	96	96
AsAJU103	Bragança, Pará	0° 49' 12"S, 46° 36' 56"W	221	221	150	176	229	235	218	218	169	169	172	176	211	211	174	174	200	204	107	107	182	182	159	165	175	175	161	161	181	181	149	149	262	262	241	241	163	163	178	184	96	96
AsAJU104	Bragança, Pará	0° 49' 12"S, 46° 36' 56"W	219	219	148	150	213	213	218	220	169	169	172	176	211	211	174	174	208	208	107	107	182	182	165	165	175	175	161	161	181	181	149	149	262	262	241	241	163	163	178	178	96	96
AsAJU105	Bragança, Pará	0° 49' 12"S, 46° 36' 56"W	219	219	148	148	229	237	218	218	179	179	172	176	211	211	174	174	200	206	107	107	182	182	159	165	175	175	161	161	181	181	149	149	262	262	241	241	163	163	178	178	96	96
AsAJU106	Bragança, Pará	0° 49' 12"S, 46° 36' 56"W	219	221	148	148	231	233	218	220	169	169	172	176	209	209	174	174	200	202	107	107	182	182	165	165	175	175	161	161	181	181	149	149	262	262	241	241	163	163	178	178	96	96
AsAJU107	Bragança, Pará	0° 49' 12"S, 46° 36' 56"W	219	221	148	148	213	213	218	218	169	169	172	172	209	211	174	178	200	200	107	107	182	182	165	165	175	175	161	161	181	183	149	149	262	262	241	241	163	163	178	178	96	96
AsAJU108	Bragança, Pará	0° 49' 12"S, 46° 36' 56"W	219	221	148	150	213	213	218	220	169	169	172	172	211	211	174	174	200	206	107	107	182	182	165	165	175	175	161	161	181	181	149	149	262	262	241	241	163	163	178	178	96	96
AsAJU109	Bragança, Pará	0° 49' 12"S, 46° 36' 56"W	219	219	148	148	231	231	218	218	169	169	172	172	209	209	176	176	200	208	107	107	182	182	159	159	175	175	161	161	181	183	149	149	262	262	241	241	163	163	178	178	96	96
AsAJU110	Bragança, Pará	0° 49' 12"S, 46° 36' 56"W	219	223	178	178	217	229	218	218	169	171	176	176	211	211	174	174	226	226	107	107	182	182	165	165	177	177	161	161	181	181	149	149	262	262	241	241	163	163	178	178	96	96
AsAJU111	Bragança, Pará	0° 49' 12"S, 46° 36' 56"W	219	223	148	152	225	231	218	220	169	169	172	176	209	211	174	176	200	202	107	107	182	182	165	165	175	175	161	161	181	181	149	149	262	262	241	241	163	163	178	184	96	96
AsAJU112	Bragança, Pará	0° 49' 12"S, 46° 36' 56"W	221	221	150	150	229	229	218	218	169	169	176	176	211	211	174	174	206	206	107	107	182	182	165	165	175	175	161	161	181	181	149	149	262	262	241	241	163	163	178	178	96	96
AsAJU113	Bragança, Pará	0° 49' 12"S, 46° 36' 56"W	219	219	148	148	227	231	218	220	169	169	172	176	211	211	174	180	200	200	107	107	182	182	159	165	175	175	161	161	181	181	149	149	262	262	241	241	163	163	178	178	96	96
AsAJU114	Bragança, Pará	0° 49' 12"S, 46° 36' 56"W	219	221	148	150	229	229	218	220	169	169	172	176	209	211	174	180	206	210	107	107	182	182	165	165	175	175	161	161	181	181	149	149	262	262	241	241	163	163	178	178	96	96
AsAJU115	Bragança, Pará	0° 49' 12"S, 46° 36' 56"W	217	219	148	154	229	229	216	218	169	169	172	172	209	211	174	174	208	210	107	107	182	182	165	165	175	175	161	161	181	181	149	149	262	262	241	241	163	163	178	178	96	96
AsAJU116	Bragança, Pará	0° 49' 12"S, 46° 36' 56"W	217	221	150	152	227	233	218	218	169	169	176	176	209	211	174	174	200	208	107	107	182	182	165	165	175	175	161	161	181	181	149	149	262	262	241	241	163	163	184	184	96	96
AsAJU117	Bragança, Pará	0° 49' 12"S, 46° 36' 56"W	219	219	150	150	213	229	218	218	169	169	172	172	211	211	174	174	200	202	107	107	182	182	165	165	175	175	161	161	181	181	149	149	262	262	241	241	163	163	178	178	96	96
AsAJU118	Bragança, Pará	0° 49' 12"S, 46° 36' 56"W	219	219	148	150	217	231	218	220	169	169	176	176	211	211	174	174	198	208	107	107	182	182	165	165	175	175	161	161	181	181	149	149	262	262	241	241	163	163	184	184	96	96
AsAJU119	Bragança, Pará	0° 49' 12"S, 46° 36' 56"W	219	219	148	148	213	229	216	220	167	169	172	172	209	209	174	174	200	204	107	107	182	182	165	165	175	175	161	161	181	181	149	149	262	262	241	241	163	163	178	178	96	96
AsPRM27	Bragança, Pará	0° 57' 42"S, 46° 37' 5 "W			150	150	229	233	220	220	179	179	172	176	209	209			208	208	107	107	182	182	165	165	175	175	161	161	181	181	149	149	262	262	241	241	163	163	178	178	96	96
AsPRM28	Bragança, Pará	0° 57' 42"S, 46° 37' 5 "W	219	219	148	148	229	229	220	220	169	169	176	176	209	211	174	178	200	208	107	107	182	182	165	165	175	175	161	161	181	181	149	149	262	262	241	241	163	163	178	178	96	96
AsPRM29	Bragança, Pará	0° 57' 42"S, 46° 37' 5 "W	219	221	148	150	213	231	216	224	169	169	172	172	209	211	174	174	200	200	107	107	182	182	165	165	175	175	161	161	181	181	149	149	262	262	259	259	163	163	178	184	96	96
AsPRM30	Bragança, Pará	0° 57' 42"S, 46° 37' 5 "W	219	219	148	148	229	229	220	220	179	179	172	172	209	211	174	174	208	208	107	107	182	182	165	165	175	175	161	161	181	181	149	149	262	262	241	241	163	163	184	184	96	96
AsPRM31	Bragança, Pará	0° 57' 42"S, 46° 37' 5 "W	219	221	152	178	215	229			179	179	172	176	211	211	174	174	200	200	107	107	182	182	165	165	175	175	161	161	181	181	149	149	262	262	241	241	163	163	178	178	96	96
AsPRM32	Bragança, Pará	0° 57' 42"S, 46° 37' 5 "W	219	221	150	150	237	237			179	179	172	172	209	209	174	174	200	208	107	107	182	182	165	165	175	175	161	161	181	181	149	149	262	262	241	241	163	163	178	178	96	96
AsPRM33	Bragança, Pará	0° 57' 42"S, 46° 37' 5 "W	217	221			227	233	218	220	169	169	172	176	209	209	174	174	208	208	107	107	182	182	159	165	175	175	161	161	181	181	149	149	262	262	241	241	163	163			96	96
AsPRM34	Bragança, Pará	0° 57' 42"S, 46° 37' 5 "W	219	219	150	150	233	237	218	224	179	183	172	172	211	211	174	174	208	208	107	107	182	182	165	165	175	175	161	161	181	181	149	149	262	262	241	241	163	163	178	178	96	96
AsPRM35	Bragança, Pará	0° 57' 42"S, 46° 37' 5 "W	219	219	150	150	231	231	222	222	169	169	172	172	211	211	174	174	208	208	107	107	182	182	165	165	175	175	161	161	181	181	149	149	262	262	241	241	163	163	178	178	96	96
AsPRM36	Bragança, Pará	0° 57' 42"S, 46° 37' 5 "W	219	219	148	148	229	229	220	220	169	169	176	176	211	211	174	174	206	206	107	107	182	182	165	165	175	175	161	161	181	181	149	149	262	262	241	241	163	163	178	178	96	96
AsPRM37	Bragança, Pará	0° 57' 42"S, 46° 37' 5 "W	223	223	150	150	213	229	220	220	169	169	176	176	211	211	174	174	200	200	107	107	182	182	165	165	175	175	161	161	181	181	149	149	262	262	241	241	163	163	178	178	96	96
AsPRM38	Bragança, Pará	0° 57' 42"S, 46° 37' 5 "W	221	221	150	150	237	237	224	224	183	183	172	172	209	211	174	174	200	200	107	107	182	182			175	175	161	161	181	181	149	149	262	262	241	241	163	163	178	178	96	96
AsPRM39	Bragança, Pará	0° 57' 42"S, 46° 37' 5 "W	219	221	148	148	233	237	218	218	179	183	172	172	209	209	174	174	200	208	107	107	182	182	165	165	175	175	161	161	181	181	149	149	262	262	241	241	163	163	178	178	96	96
AsPRM40	Bragança, Pará	0° 57' 42"S, 46° 37' 5 "W	217	217	148	148	211	211	218	220	169	169	172	172	209	209	174	174	202	202	107	107	182	182	159	165	175	175	161	161	181	181	149	149	262	262	241	241	163	163	178	178	96	96
AsPRM41	Bragança, Pará	0° 57' 42"S, 46° 37' 5 "W	219	219	178	178	217	217	216	218	169	169	176	176	209	209	174	174	204	204	107	107	182	182			175	175	161	161	181	181	149	149	262	262	241	241	163	163			96	96
AsPRM42	Bragança, Pará	0° 57' 42"S, 46° 37' 5 "W	219	219	148	150	217	217	218	218	169	179	176	176	211	211	172	174	198	206	107	107	176	176			175	175	161	161	181	181	149	149	262	262	241	241	163	163			96	96
AsPRM43	Bragança, Pará	0° 57' 42"S, 46° 37' 5 "W	219	221	148	148	229	229	224	224	179	183	172	176	211	211	174	174	198	208	107	107	182	182	165	165	175	175	161	161	181	183	149	149	262	262	241	241	163	163	178	178	96	96
AsPRM44	Bragança, Pará	0° 57' 42"S, 46° 37' 5 "W	219	221	148	148	233	237	222	224	179	183	172	172	211	211	174	174	198	198	107	107	182	182	165	165	175	175	161	161	181	183	149	149	262	262	241	241	163	163	178	178	96	96
AsPRM45	Bragança, Pará	0° 57' 42"S, 46° 37' 5 "W	221	221	148	148	233	237	216	216	169	169	172	172	211	211	174	174	196	196	107	107	176	182	165	165	175	175	161	161	181	181	149	149	262	262	241	241	163	163	178	178	96	96
AsPRM46	Bragança, Pará	0° 57' 42"S, 46° 37' 5 "W	217	217	148	148	213	213	220	220	169	179	172	172			174	174	200	218	107	107	182	182	159	165	175	175	161	161	181	181	149	149	262	262	241	241	163	163	178	178	96	96
AsPRM47	Bragança, Pará	0° 57' 42"S, 46° 37' 5 "W	217	217	148	148	211	229	218	218	169	169	172	176	209	211	174	174	208	208	107	107	182	184	165	165	175	175	161	161	181	181	149	149	262	262	241	241	163	163	178	184	96	96
AsPRM48	Bragança, Pará	0° 57' 42"S, 46° 37' 5 "W	219	219	148	148	235	235	218	218	169	169	172	176			174	174	200	200	107	107	182	182	165	165	175	175	161	161	181	181	149	149	262	262	243	245	163	163	178	178	96	96
AsPRM49	Bragança, Pará	0° 57' 42"S, 46° 37' 5 "W	217	217	150	150	213	215	220	220	169	169	172	176	211	211	174	178	200	200	107	107	182	182	159	165	175	175	161	161	181	181	149	149	262	262	241	241	163	163			96	96
AsPRM50	Bragança, Pará	0° 57' 42"S, 46° 37' 5 "W	219	219	150	152	213	215	220	220	169	169	172	176	209	211	174	174	200	208	107	107	182	182			175	175	161	161	181	181	149	149	262	262	241	241	163	163			96	96
AsPRM51	Bragança, Pará	0° 57' 42"S, 46° 37' 5 "W	219	223	148	150	227	229	220	220	179	179	172	172	209	211	174	174	200	200	107	107	182	182	165	165	175	175	161	161	181	181	149	149	262	262	241	241	163	163	178	184	96	96
AsPRM52	Bragança, Pará	0° 57' 42"S, 46° 37' 5 "W	219	221	150	150	227	235	218	224	179	179	172	176	211	211	174	174	200	208	107	107	182	182	165	165	175	175	161	161	181	181	149	149	262	262	241	241	163	163	178	178	96	96
AsPRM53	Bragança, Pará	0° 57' 42"S, 46° 37' 5 "W	221	221	148	148	237	237	216	218	169	179	172	172	211	211	176	176	200	200	107	107	182	182			175	175	161	161	181	181	149	149	262	262	241	241	163	163			96	96
AsPRM54	Bragança, Pará	0° 57' 42"S, 46° 37' 5 "W	219	219	150	150	231	233	218	218	169	169	172	172	209	209	174	174	206	206	107	107	182	182			175	175	161	161	181	181	149	149	262	262	241	241	163	163			96	96
AsPRM55	Bragança, Pará	0° 57' 42"S, 46° 37' 5 "W	219	221	150	150	213	231	218	218	169	169	172	172	209	211	174	174	200	200	107	107	176	182	165	165	175	175	161	161	181	183	149	149	262	262	241	241	163	163	178	178	96	96
AsPRM56	Bragança, Pará	0° 57' 42"S, 46° 37' 5 "W	221	217	148	150	213	215	218	218	169	169	172	172	209	211	174	174	196	200	107	107	182	182			175	175	161	161	181	181	149	149	262	262	241	241	163	163	178	178	96	96
AsPRM57	Bragança, Pará	0° 57' 42"S, 46° 37' 5 "W	219	219	178	178	227	231	218	220	169	179	172	176	209	209	174	174	200	210	107	107	182	182			175	175	161	161	181	181	149	149	262	262	241	241	163	163			96	96
AsPRM58	Bragança, Pará	0° 57' 42"S, 46° 37' 5 "W	219	219	148	150	215	231	218	220	169	179	172	172	209	211	174	178	196	200	107	107	182	182	165	165	175	175	161	161	181	181	149	149	262	262	241	241	163	163			96	96
AsPRM59	Bragança, Pará	0° 57' 42"S, 46° 37' 5 "W	217	217	148	148	227	231	218	218	169	169	172	176	211	211			198	198	107	107	182	182	165	165	175	175	161	161	181	181	149	149	262	262	241	241	163	163	178	178	96	96
AsPRM60	Bragança, Pará	0° 57' 42"S, 46° 37' 5 "W	217	223	148	150	213	213	218	218	169	169	176	176	211	211	174	174	208	208	107	107	182	182			175	175	161	161	181	181	149	149	262	262	241	241	163	163			96	96
AsPRM61	Bragança, Pará	0° 57' 42"S, 46° 37' 5 "W	219	219	148	148	229	235	218	218	179	179	172	176	209	209			200	204	107	107	182	182	165	165	175	175	161	161	181	181	149	149	262	262	241	241	163	163	178	184	96	96
AsPRM62	Bragança, Pará	0° 57' 42"S, 46° 37' 5 "W	219	221			215	233	218	222	169	169	172	176	209	211	174	174	200	200	107	107	182	182	159	159	175	175	161	161	181	181	149	149	262	262	241	241	163	163	178	178	96	96
AsPRM63	Bragança, Pará	0° 57' 42"S, 46° 37' 5 "W	217	219	148	148	213	215	218	220	169	179	172	176	211	211			202	210	107	107	182	182	165	165	175	175	161	161	181	181	149	149	262	262	241	241	163	163	178	178	96	96
AsPRM64	Bragança, Pará	0° 57' 42"S, 46° 37' 5 "W	221	223	148	148	227	231	218	220	169	169	172	172			174	174	208	210	107	107	182	182	165	165	175	175	161	161	181	181	149	149	262	262	241	241	163	163	178	178	96	96
AsPRM65	Bragança, Pará	0° 57' 42"S, 46° 37' 5 "W	217	219	152	152	215	233	218	218	169	169	172	176	211	211			200	200	107	107	182	182	165	165	175	175	161	161	181	181	149	149	262	262	241	241	163	163	184	184	96	96
AsPRM66	Bragança, Pará	0° 57' 42"S, 46° 37' 5 "W	221	221	178	178	229	229	218	220	169	169	172	172	211	211	174	174	200	200	107	107	182	182	165	165	175	175	161	161	181	181	149	149	262	262	241	243	163	163	178	184	96	96
AsPRM67	Bragança, Pará	0° 57' 42"S, 46° 37' 5 "W	217	217	178	178	227	229	218	220	169	179	172	176	209	209			204	210	107	107	182	182	159	159	175	175	161	161	181	181	149	149	262	262	241	241	163	163	178	178	96	96
AsPRM68	Bragança, Pará	0° 57' 42"S, 46° 37' 5 "W	217	221	148	152	217	217	218	218	169	169	172	172	211	211	174	174	200	210	107	107	182	182	159	165	175	175	161	161	181	181	149	149	262	262	241	259	163	163	178	184	96	96
AsPRM69	Bragança, Pará	0° 57' 42"S, 46° 37' 5 "W	219	219	148	148	213	231	218	218	179	179	172	176	209	209			200	200	107	107	182	182	159	163	175	175	161	161	181	181	149	149	262	262	241	241	163	163	178	178	96	96
AsPRM70	Bragança, Pará	0° 57' 42"S, 46° 37' 5 "W	217	219	148	150	227	231	218	218	169	169	172	176	211	211	178	178	210	210	107	107	182	182	165	165	175	175	161	161	181	181	149	149	262	262	241	241	163	163	178	178	96	96
AsPRM71	Bragança, Pará	0° 57' 42"S, 46° 37' 5 "W	219	219	148	148	233	233	218	218	169	179	172	172	211	211			194	206	107	107	182	182			175	175	161	161	181	181	149	149	262	262	241	241	163	163	178	178	96	96
AsPRM72	Bragança, Pará	0° 57' 42"S, 46° 37' 5 "W	221	221	148	150	213	231	218	218	179	179	172	172	209	209	174	178	200	208	107	107	182	182	165	165	175	175	161	161	181	181	149	149	262	262	241	241	163	163			96	96
AsPRM73	Bragança, Pará	0° 57' 42"S, 46° 37' 5 "W	219	225	148	148	227	227	220	222	179	179			211	211			200	200	107	107	182	182	165	165	175	175	161	161	181	181	149	149	262	262	241	241	163	163	184	184	96	96
AsSAL74	Salinópolis, Pará	0°36'36"S, 47°22'41"W	219	219	148	148	213	235	218	218			172	172	209	209	174	178	200	208	107	107	176	182	159	165	175	175	161	161	181	181	149	149	262	262	241	241	163	163	178	178	96	96
AsSAL75	Salinópolis, Pará	0°36'36"S, 47°22'41"W	217	221	148	150	229	229	218	218	179	179	172	176	209	213	174	178	210	210	107	107	182	182	165	165	175	175	161	161	181	181	149	149	262	262	241	241	163	163	178	178	96	96
AsSAL76	Salinópolis, Pará	0°36'36"S, 47°22'41"W	219	223	148	150	227	229	218	220	179	179	172	176	209	211	174	174	198	200	107	107	182	182	165	165	175	175	161	161	181	181	149	149	262	262	241	259	163	163	178	178	96	96
AsSAL77	Salinópolis, Pará	0°36'36"S, 47°22'41"W	219	221	148	148	227	227	218	218	179	179	172	172	209	209	176	176	210	210	107	107	182	182	165	165	175	175	161	161	181	181	149	149	262	262	241	241	163	163			96	96
AsSAL78	Salinópolis, Pará	0°36'36"S, 47°22'41"W	217	225	138	150	229	229	218	220	169	179	172	172	209	211	174	174	198	200	107	107	182	182	159	163	175	175	161	161	181	181	149	149	262	262	241	241	163	163	178	178	96	96
AsSAL79	Salinópolis, Pará	0°36'36"S, 47°22'41"W	217	219	148	148	213	229	218	218	169	169	172	172	211	211	174	178	210	210	107	107	182	182	159	165	175	175	161	161	181	181	149	149	262	262	241	241	163	163	178	184	96	96
AsSAL80	Salinópolis, Pará	0°36'36"S, 47°22'41"W			148	150	211	229	218	220			172	176	211	211	174	178	198	198	107	107	182	182	165	165	175	175	161	161	181	181	149	149	262	262	241	241	163	163	178	178	96	96
AsSAL81	Salinópolis, Pará	0°36'36"S, 47°22'41"W	221	221	148	148	213	233	220	220	169	179	172	172	209	209	174	174	208	208	107	107	182	182	165	165	175	175	161	161	181	181	149	149	262	262	241	241	163	163	178	178	96	96
AsSAL82	Salinópolis, Pará	0°36'36"S, 47°22'41"W	219	221	148	148	213	227	218	218	169	169	176	176	209	211	174	180	200	200	107	107	182	182	159	165	175	175	161	161	181	181	149	149	262	262	241	241	163	163	178	178	96	96
AsSAL83	Salinópolis, Pará	0°36'36"S, 47°22'41"W	223	223	148	148	231	235	218	220	169	169	172	172			176	178	200	200	107	107	182	182	165	165	175	175	161	161	181	181	149	149	262	262	241	241	163	163	178	184	96	96
AsSAL84	Salinópolis, Pará	0°36'36"S, 47°22'41"W	219	219	148	148	229	229	218	218	169	169	172	172	209	209	174	174	200	210	107	107	182	182	165	165	175	175	161	161	181	181	149	149	262	262	241	259	163	163	178	178	96	96
AsSAL85	Salinópolis, Pará	0°36'36"S, 47°22'41"W	219	219	148	148	229	231	220	220	169	169	176	176	211	211	174	174	200	200	107	107	182	182	159	165	175	175	161	161	181	181	149	149	262	262	241	241	163	163	178	178	96	96
AsSAL86	Salinópolis, Pará	0°36'36"S, 47°22'41"W	217	219	148	152	231	231	218	218	175	175	176	176	211	211	174	174	200	206	107	107	182	182			175	175	161	161	181	181	149	149	262	262	241	241	163	163	178	178	96	96
AsSAL87	Salinópolis, Pará	0°36'36"S, 47°22'41"W	219	221	148	148	213	229	216	218	179	179	172	176	209	209	174	174	200	206	107	107	182	182	165	165	175	175	161	161	181	181	149	149	262	262	241	241	163	163	178	178	96	96
AsSAL88	Salinópolis, Pará	0°36'36"S, 47°22'41"W	219	219	148	148	213	231	220	220	169	169	172	172	211	211	174	174	200	200	107	107	182	182	165	165	175	175	161	161	181	181	149	149	262	262	241	241	163	163			96	96
AsSAL89	Salinópolis, Pará	0°36'36"S, 47°22'41"W	219	219	148	148	213	215	220	220	179	179	176	176	211	211	174	174	200	204	107	107	182	182			175	175	161	161	181	181	149	149	262	262	241	241	163	163			96	96
AsSAL90	Salinópolis, Pará	0°36'36"S, 47°22'41"W	217	221	148	150	217	229	218	220	169	179	172	172	209	211	174	174	204	208	107	107	182	182			175	175	161	161	181	181	149	149	262	262	241	241	163	163			96	96
AsSAL91	Salinópolis, Pará	0°36'36"S, 47°22'41"W	219	219	148	150	213	231	218	218	169	169	172	176	209	209	174	180	210	210	107	107	182	182			175	175	161	161	181	181	149	149	262	262	241	241	163	163			96	96
AsSAL92	Salinópolis, Pará	0°36'36"S, 47°22'41"W	219	219	148	148	231	231	218	220	169	169	176	176	209	211	174	174	200	200	107	107	182	182			175	175	161	161	181	181	149	149	262	262	241	241	163	163			96	96
AsSAL93	Salinópolis, Pará	0°36'36"S, 47°22'41"W	219	219	148	148	227	229	218	220	169	169	172	172	209	211	174	174	200	200	107	107	182	182	159	165	175	175	161	161	181	181	149	149	262	262	241	241	163	163	184	184	96	96
AsSAL94	Salinópolis, Pará	0°36'36"S, 47°22'41"W	219	219	148	148	227	229	218	218	169	169	172	172	211	211	174	178	202	210	107	107	182	182	165	165	175	175	161	161	181	181	149	149	262	262	241	241	163	163	178	178	96	96
AsSAL95	Salinópolis, Pará	0°36'36"S, 47°22'41"W	217	219	148	148	231	231	218	218	169	169	172	176			174	178	200	208	107	107	182	182			175	175	161	161	181	181	149	149	262	262	241	241	163	163			96	96
AsGPM1	Guapimirim, Rio de Janeiro	22°42'5"S, 43°0'26"W			162	162	209	209	218	218	169	169	176	176	209	209	182	182			107	107	176	176	169	169	175	175	151	151	181	181	149	149	262	262			163	163	178	178	96	96
AsGPM2	Guapimirim, Rio de Janeiro	22°42'5"S, 43°0'26"W	209	219	152	158	209	211	218	218	169	169	176	176	209	209	184	184	204	204	107	107	176	176	169	169	175	175	151	151	181	181	149	149	262	262	259	259	163	163	178	178	96	96
AsGPM3	Guapimirim, Rio de Janeiro	22°42'5"S, 43°0'26"W	217	219	156	158	209	209	218	220	169	169	176	176	209	209	180	180	204	208	107	107	176	176	169	169	175	175	151	151	181	181	149	149	262	262	257	259	163	163	178	178	96	96
AsGPM4	Guapimirim, Rio de Janeiro	22°42'5"S, 43°0'26"W	217	217	152	160	209	209	218	220	169	169	172	176	209	209	182	184	204	204	107	107	176	176	169	169	175	175	151	151	181	181	149	149	262	262	259	259	163	163	178	178	96	96
AsGPM5	Guapimirim, Rio de Janeiro	22°42'5"S, 43°0'26"W	219	219	144	160	209	209	218	218	169	169	172	176	209	211	180	182	206	206	107	107	176	176	169	169	175	175	151	151	181	181	149	149	262	262	255	259	163	163	178	178	96	96
AsGPM6	Guapimirim, Rio de Janeiro	22°42'5"S, 43°0'26"W	217	219	154	156	209	211	218	218	169	169	172	172	209	209	182	184	208	208	107	107	176	176	169	169	175	175	151	151	181	181	149	149	262	262	259	259	163	163	178	178	96	96
AsGPM7	Guapimirim, Rio de Janeiro	22°42'5"S, 43°0'26"W	215	215	154	156	209	209	218	218	169	169	176	176	209	211	184	184	204	204	107	107	176	176	169	169	175	175	151	151	181	181	149	149	262	262	259	259	163	163	178	178	96	96
AsGPM8	Guapimirim, Rio de Janeiro	22°42'5"S, 43°0'26"W	219	219	154	156	209	209	218	218	169	169	176	176	209	209	184	184	204	204	107	107	176	176	169	169	175	175	151	161	181	181	149	149	262	262	259	259	163	163	178	178	96	96
AsGPM9	Guapimirim, Rio de Janeiro	22°42'5"S, 43°0'26"W	217	219	168	168	209	209	218	218	169	169	172	174	209	211	184	184	204	204	107	107	176	176	169	169	175	175	151	151	181	181	149	149	262	262	259	259	163	163	178	178	96	96
AsGPM10	Guapimirim, Rio de Janeiro	22°42'5"S, 43°0'26"W	219	219	158	158	209	209	218	218	169	169	172	176	209	209	184	184	208	208	107	107	176	176	169	169	175	175	151	151	181	181	149	149	262	262	259	259	163	163	178	178	96	96
AsGPM11	Guapimirim, Rio de Janeiro	22°42'5"S, 43°0'26"W	219	219	152	152	209	209	218	218	169	169	172	176	209	209	186	186	204	206	107	107	176	176	169	169	175	175	151	151	181	181	149	149	262	262	259	259	163	163	178	178	96	96
AsGPM12	Guapimirim, Rio de Janeiro	22°42'5"S, 43°0'26"W	219	219	152	164	209	211	218	218	169	169	176	176	209	209	184	186	204	206	107	107	176	176	169	169	175	175	151	151	181	181	149	149	262	262	255	255	163	163	178	178	96	96
AsGPM13	Guapimirim, Rio de Janeiro	22°42'5"S, 43°0'26"W	217	219	154	166	209	209	218	218	169	169	172	172	201	209	182	182	204	204	107	107	176	182	169	169	175	175	151	151	181	181	149	149	262	262	259	259	163	163	178	178	96	96
AsGPM14	Guapimirim, Rio de Janeiro	22°42'5"S, 43°0'26"W	219	219	152	152	207	207	218	218	169	169	172	176	209	209	180	180	204	204	107	107	176	176	169	169	175	175	151	151	181	181	149	149	262	262	259	259	163	163	178	178	96	96
AsGPM15	Guapimirim, Rio de Janeiro	22°42'5"S, 43°0'26"W	217	217	152	164	209	209	218	218	169	169	172	176	209	209	182	182	204	208	107	107	176	182	169	169	175	175	151	151	181	181	149	149	262	262	259	259	163	163	178	178	96	96
AsGPM16	Guapimirim, Rio de Janeiro	22°42'5"S, 43°0'26"W	219	219	156	156	209	209	218	218	169	169	176	176	209	209	184	184			107	107			169	169	175	175	151	151	181	181	149	149	262	262	259	259	163	163	178	178	96	96
AsGPM17	Guapimirim, Rio de Janeiro	22°42'5"S, 43°0'26"W	219	219	156	158	209	209	218	218	169	169	176	176	209	209	182	184	204	204	107	107	176	176	169	169	175	175	151	151	181	181	149	149	262	262	259	259	163	163	178	178	96	96
AsGPM18	Guapimirim, Rio de Janeiro	22°42'5"S, 43°0'26"W	219	219	156	158	209	211	218	218	169	169	176	176	209	209	182	182	204	204	107	107	176	176	169	169	175	175	151	151	181	181	149	149	262	262	259	259	163	163	178	178	96	96
AsGPM19	Guapimirim, Rio de Janeiro	22°42'5"S, 43°0'26"W	219	219	156	160	209	209	218	218	169	162	176	176	209	209	182	182	204	204	107	107	176	176	169	169	175	175	151	151	181	181	149	149	262	262	259	259	163	163	178	178	96	96
AsGPM20	Guapimirim, Rio de Janeiro	22°42'5"S, 43°0'26"W	219	219	152	152	209	209	218	218	169	169	176	176	209	209					107	107	176	176	169	169	175	175	151	151	181	181	149	149	262	262	259	259	163	163	178	178	96	96
AsGPM21	Guapimirim, Rio de Janeiro	22°42'5"S, 43°0'26"W	219	219	152	158	209	209	218	218	169	169	176	176	209	209	184	186	204	206	107	107	176	176	169	169	175	175	151	151	181	181	149	149	262	262	259	259	163	163	178	178	96	96
AsGPM22	Guapimirim, Rio de Janeiro	22°42'5"S, 43°0'26"W	219	219	156	156	209	209	218	218	169	169	172	172	209	209	186	186			107	107	176	176	169	169	175	175	151	151	181	181	149	149	262	262	259	259	163	163	178	178	96	96
AsGPM23	Guapimirim, Rio de Janeiro	22°42'5"S, 43°0'26"W	209	219	156	166	209	209	218	218	169	169	176	176	209	209	180	186	204	204	107	107	176	176	169	169	175	175	151	151	181	181	149	149	262	262	259	259	163	163	178	178	96	96
AsGPM24	Guapimirim, Rio de Janeiro	22°42'5"S, 43°0'26"W	219	219	154	158	209	209	218	218	169	169	176	176	209	209	186	186			107	107	176	176	169	169	175	175	151	151	181	181	149	149	262	262	259	259	163	163	178	178	96	96
AsGPM25	Guapimirim, Rio de Janeiro	22°42'5"S, 43°0'26"W	219	219	154	156	209	211	218	218	169	169	172	172	209	209	180	180	204	204	107	107	176	176	169	169	175	175	151	151	181	181	149	149	262	262	259	259	163	163	178	178	96	96
AsGPM26	Guapimirim, Rio de Janeiro	22°42'5"S, 43°0'26"W	219	219	154	156	209	211	218	218	169	169	172	176	209	209	182	184	204	204	107	107	176	176	169	169	175	175	151	151	181	181	149	149	262	262	259	259	163	163	178	178	96	96
AsGPM27	Guapimirim, Rio de Janeiro	22°42'5"S, 43°0'26"W	219	219	154	156	209	211	218	218	169	169	176	176	209	209	182	184	204	204	107	107	176	176	169	169	175	175	151	161	181	181	149	149	262	262	259	259	163	163	178	178	96	96
AsGPM28	Guapimirim, Rio de Janeiro	22°42'5"S, 43°0'26"W	219	219	152	152	209	209	218	218	169	169	172	176	209	209	182	184	204	204	107	107	176	176	169	169	175	175	151	151	181	181	149	149	262	262	259	259	163	163	178	178	96	96
AsGPM29	Guapimirim, Rio de Janeiro	22°42'5"S, 43°0'26"W	209	219	154	166	209	209	218	218	169	169	176	176	209	209	180	184	204	204	107	107	176	176	169	169	175	175	151	151	181	181	149	149	262	262	259	259	163	163	178	178	96	96
AsGPM30	Guapimirim, Rio de Janeiro	22°42'5"S, 43°0'26"W	219	219	166	166	209	209	218	218	169	169	172	172	209	209	180	180	204	206	107	107	176	176	169	169	175	175	151	151	181	181	149	149	262	262	259	259	163	163	178	178	96	96
AsGPM31	Guapimirim, Rio de Janeiro	22°42'5"S, 43°0'26"W	219	221	156	156	209	211	218	218	169	169	176	176	209	209	180	180	204	204	107	107	176	176	169	169	175	175	151	151	181	181	149	149	262	262	259	259	163	163	178	178	96	96
AsGPM32	Guapimirim, Rio de Janeiro	22°42'5"S, 43°0'26"W	219	219	154	156	209	209	218	218	169	169	172	176	209	209	180	182	202	202	107	107	176	182	169	169	175	175	151	151	181	181	149	149	262	262	259	259	163	163	178	178	96	96
AsGPM33	Guapimirim, Rio de Janeiro	22°42'5"S, 43°0'26"W	217	219	166	166	207	207	218	220	169	169	176	176	209	209	184	184	204	204	107	107			169	169	175	175	151	151	181	181	149	149	262	262	259	259	163	163	178	178	96	96
AsGPM34	Guapimirim, Rio de Janeiro	22°42'5"S, 43°0'26"W	219	219	154	156	209	209	218	218	169	169	176	176	209	209	184	184			107	107	176	176	169	169	175	175	151	151	181	181	149	149	262	262	259	259	163	163	178	178	96	96
AsGPM35	Guapimirim, Rio de Janeiro	22°42'5"S, 43°0'26"W			160	160	209	209	218	220	169	169	176	176	209	209	180	180	206	208	107	107	176	176	169	169	175	175	151	151	181	181	149	149	262	262	259	259	163	163	178	178	96	96
AsVER1	Vera Cruz, Bahia	12°59'1"S, 38°41'5"W	217	217	154	154	209	209	218	218	165	169			209	209	182	184	206	206	107	107	182	182	169	169	175	175	151	151	181	181	149	149	262	262	263	263	163	163	178	178	96	96
AsVER2	Vera Cruz, Bahia	12°59'1"S, 38°41'5"W	217	217	154	154	209	209	218	218	169	169	166	176	209	209	182	184	206	206	107	107	176	176	169	169	175	175	151	151	181	181	149	149	262	262	263	263	163	163	178	178	96	96
AsVER3	Vera Cruz, Bahia	12°59'1"S, 38°41'5"W	217	217	154	154	209	209	218	218	169	169	176	176	209	209	182	182	206	206	107	107	176	176	169	169	175	175	151	151	181	181	149	149	262	262	263	263	163	163	178	178	96	96
AsVER4	Vera Cruz, Bahia	12°59'1"S, 38°41'5"W	215	217	154	154	209	209	218	218	169	169	176	176	209	209	182	182	204	204	107	107	176	176	169	169	175	175	151	151	181	181	149	149	262	262	263	263	163	163	178	178	96	96
AsVER5	Vera Cruz, Bahia	12°59'1"S, 38°41'5"W	217	217	166	166	209	209	218	218	169	169	172	176	209	209	182	184	202	206	107	107	176	182	169	169	175	175	151	151	181	181	149	149	262	262			163	163	178	178	96	96
AsVER6	Vera Cruz, Bahia	12°59'1"S, 38°41'5"W	215	217	166	166	209	209	218	218	169	169	176	176	209	209	182	182	206	208	107	107	176	176	169	169	175	175	151	151	181	181	149	149	262	262			163	163	178	178	96	96
AsVER7	Vera Cruz, Bahia	12°59'1"S, 38°41'5"W	217	217	152	156	209	209	218	218	169	169	176	176	209	209	182	184	206	206	107	107	182	182	169	169	175	175	151	151	181	181	149	149	262	262	263	263	163	163	178	178	96	96
AsVER8	Vera Cruz, Bahia	12°59'1"S, 38°41'5"W	217	219	154	156	209	209	218	218	169	169	176	176	209	211	182	182	206	206	107	107			169	169	175	175	151	151	181	181	149	149	262	262			163	163	178	178	96	96
AsVER9	Vera Cruz, Bahia	12°59'1"S, 38°41'5"W	217	219	166	166	209	209	218	218	169	169			209	209					107	107	176	176	169	169	175	175	151	151	181	181	149	149	262	262	263	263	163	163	178	178	96	96
AsVER10	Vera Cruz, Bahia	12°59'1"S, 38°41'5"W	219	219	154	154	209	209	218	218	169	169	176	176	209	209	182	182	208	210	107	107	176	176	169	169	175	175	151	151	181	181	149	149	262	262	263	263	163	163	178	178	96	96
AsVER11	Vera Cruz, Bahia	12°59'1"S, 38°41'5"W	217	219	154	154	209	209	218	220	169	169	172	176	209	209	182	182	206	206	107	107	176	176	169	169	175	175	151	151	181	181	149	149	262	262	263	263	163	163	178	178	96	96
AsVER12	Vera Cruz, Bahia	12°59'1"S, 38°41'5"W	215	219	154	156	209	209	218	218	169	169	172	176	209	209	182	182	208	208	107	107	176	176	169	169	175	175	151	151	181	181	149	149	262	262	245	245	163	163	178	178	96	105
AsVER13	Vera Cruz, Bahia	12°59'1"S, 38°41'5"W	217	219	154	154	209	209	218	218	169	169	176	176	209	209	178	182	206	210	107	107	176	176	169	169	175	175	151	151	181	181	149	149	262	262	245	263	163	163	178	178	96	96
AsVER14	Vera Cruz, Bahia	12°59'1"S, 38°41'5"W	217	219	154	156	209	209	218	218	169	169	176	176	209	209	182	182	206	210	107	107	176	176	169	169	175	175	151	151	181	181	149	149	262	262	263	263	163	163	178	178	96	96
AsVER15	Vera Cruz, Bahia	12°59'1"S, 38°41'5"W	215	217	152	152	209	209	218	218	169	169	174	176	209	209	182	182	206	210	107	107	176	176	169	169	175	175	151	151	181	181	149	149	262	262	263	263	163	163	178	178	96	96
AsVER16	Vera Cruz, Bahia	12°59'1"S, 38°41'5"W	215	215	152	152	209	209	218	218	169	169	174	176	209	209	182	182	210	210	107	107	176	176	169	169	175	175	151	151	181	181	149	149	262	262			163	163	178	178	105	105
AsVER17	Vera Cruz, Bahia	12°59'1"S, 38°41'5"W	213	215	152	152	209	211	218	218	169	169	166	176	209	209	182	182	202	206	107	107	176	176	169	169	175	175	151	151	181	181	149	149	262	262	245	263	163	163	178	178	96	96
AsVER18	Vera Cruz, Bahia	12°59'1"S, 38°41'5"W	215	215	154	154	209	209	218	218	169	169	176	176	209	211	182	182	206	206	107	107	176	176	169	169	175	175	151	161	181	181	149	149	262	262	263	263	163	163	178	178	96	96
AsVER19	Vera Cruz, Bahia	12°59'1"S, 38°41'5"W	215	215	154	154	209	209	218	218	169	169	176	176	209	209	182	182	206	206	107	107	176	176	169	169	175	175	151	151	181	181	149	149	262	262	235	235	163	163	178	178	96	96
AsVER20	Vera Cruz, Bahia	12°59'1"S, 38°41'5"W	215	215	154	154	209	209	218	218	169	169	166	176	209	211	182	182			107	107	176	176	169	169	175	175	151	151	181	181	149	149	262	262	235	263	163	163	178	178	96	96
AsVER21	Vera Cruz, Bahia	12°59'1"S, 38°41'5"W	215	215	154	154	209	209	218	218	169	169	176	176	209	209	182	182	206	206	107	107	176	176	169	169	175	175	151	151	181	181	149	149	262	262	263	263	163	163	178	178	96	96
AsVER22	Vera Cruz, Bahia	12°59'1"S, 38°41'5"W	213	215	154	154	209	211	218	218	169	169	172	176	209	211	182	182	210	210	107	107	176	176	169	169	175	175	151	151	181	181	149	149	262	262			163	163	178	178	96	96
AsVER23	Vera Cruz, Bahia	12°59'1"S, 38°41'5"W	213	215	152	168	209	211	218	218	169	169	176	176	209	209	182	182	210	210	107	107	176	176	169	169	175	175	151	151	181	181	149	149	262	262	263	263	163	163	178	178	96	96
AsVER24	Vera Cruz, Bahia	12°59'1"S, 38°41'5"W	219	219	154	156	209	209	218	218	169	169	176	176	209	211	182	182	206	206	107	107	176	176	169	169	175	175	151	151	181	181	149	149	262	262			163	163	178	178	96	96
AsVER25	Vera Cruz, Bahia	12°59'1"S, 38°41'5"W	219	219	166	166	209	209	218	218	169	169	176	176			182	182	208	208	107	107	176	176	169	169	175	175	151	151	181	181	149	149	262	262	263	265	163	163	178	178	96	96
AsVER26	Vera Cruz, Bahia	12°59'1"S, 38°41'5"W	219	219	154	166	209	209	218	218	169	169	172	172	209	211	182	182	208	208	107	107	176	176	169	169	175	175	151	151	181	181	149	149	262	262			163	163	178	178	96	105
AsVER27	Vera Cruz, Bahia	12°59'1"S, 38°41'5"W	219	219	154	156	209	209	218	218	169	169	172	176			182	182	206	206	107	107	176	176	169	169	175	175	151	151	181	181	149	149	262	262	263	263	163	163	178	178	96	96
AsVER28	Vera Cruz, Bahia	12°59'1"S, 38°41'5"W	219	219	154	156	209	209	218	218	169	169	172	176	209	211	182	182	206	206	107	107	176	176	169	169	175	175	151	151	181	181	149	149	262	262	263	263	163	163	178	178	96	96
AsVER29	Vera Cruz, Bahia	12°59'1"S, 38°41'5"W	219	219	154	156	209	209	218	218	169	169	172	176	209	209	182	182	206	206	107	107	176	176	169	169	175	175	151	151	181	181	149	149	262	262	263	263	163	163	178	178	96	96
AsVER30	Vera Cruz, Bahia	12°59'1"S, 38°41'5"W			152	156	209	209	218	218	169	169			209	209	182	182	206	206	107	107	176	176	169	169	175	175	151	151	181	181	149	149	262	262	261	263	163	163	178	178	96	96
AsVER31	Vera Cruz, Bahia	12°59'1"S, 38°41'5"W					209	209	218	218	169	169	176	176	209	209	182	182			107	107	176	176	169	169	175	175	151	161	181	183	149	149	262	262			163	163	178	178	96	96
AsALC1	Alcântara, Maranhão	2° 24' 37"S, 44° 24' 22"W	217	219	148	148	229	229	218	218	169	169	172	176	209	209	176	182	202	202	107	107	182	182	163	165	175	175	161	161	181	181	149	149	262	262	243	243	163	163	178	178	96	96
AsALC2	Alcântara, Maranhão	2° 24' 37"S, 44° 24' 22"W	219	225	148	148	217	229	218	218	169	169	172	172	209	209	182	182	202	210	107	107	182	182	163	165	175	175	151	161	181	181	149	149	262	262	243	247	163	163	178	178	96	96
AsALC3	Alcântara, Maranhão	2° 24' 37"S, 44° 24' 22"W	223	227	148	148	229	233	218	220	169	169	176	176	209	211	176	182	202	202	107	107	182	182	163	165	175	175	151	161	181	181	149	149	262	262	243	243	163	163	178	178	96	96
AsALC4	Alcântara, Maranhão	2° 24' 37"S, 44° 24' 22"W	223	227	148	148	217	229	218	222	169	169	172	176	209	209	176	182	202	202	107	107	182	182	165	165	175	175	151	161	181	181	149	149	262	262	243	243	163	163	178	178	96	96
AsALC5	Alcântara, Maranhão	2° 24' 37"S, 44° 24' 22"W	221	227			231	231	218	220	169	169	172	172	209	211	182	182	200	200	107	107	182	182	163	163	175	175	161	161	181	181	149	149	262	262	243	243	163	163	178	184	96	96
AsALC6	Alcântara, Maranhão	2° 24' 37"S, 44° 24' 22"W	219	227	148	148	229	229	218	222	169	169			209	209	176	182	202	202	107	107	182	182	163	169	175	175	161	161	181	181	149	149	262	262	243	259	163	163	178	178	96	96
AsALC7	Alcântara, Maranhão	2° 24' 37"S, 44° 24' 22"W	219	229	148	148	229	229	218	218	169	169	176	176	209	211	176	176	202	202	107	107	182	182	163	165	175	175	151	151	181	181	149	149	262	262	243	259	163	163	178	178	96	96
AsALC8	Alcântara, Maranhão	2° 24' 37"S, 44° 24' 22"W	217	221			229	229	218	218	169	169	172	172	209	209	182	182	202	202	107	107	182	182	163	163	175	175	151	151	181	181	149	149	262	262	243	243	163	163	178	178	96	96
AsALC9	Alcântara, Maranhão	2° 24' 37"S, 44° 24' 22"W	227	227	148	148	229	231	218	218	169	169	176	176	209	209	176	182	204	210	107	107	182	182	163	163	175	175	151	161	181	181	149	149	262	262	243	243	163	163	178	178	96	96
AsALC10	Alcântara, Maranhão	2° 24' 37"S, 44° 24' 22"W	215	217	148	148	217	229	218	218	169	169	172	176	209	209	182	182	202	202	107	107	182	182	163	165	175	175	151	151	181	181	149	149	262	262	243	243	163	163	178	178	96	96
AsALC11	Alcântara, Maranhão	2° 24' 37"S, 44° 24' 22"W	221	221	148	148	217	229	218	222	169	169	172	176	209	209	182	182	200	212	107	107	182	182	163	165	175	175	151	161	181	181	149	149	262	262	243	243	163	163	178	184	96	96
AsALC12	Alcântara, Maranhão	2° 24' 37"S, 44° 24' 22"W	227	227	148	148	227	231	218	218	169	169	176	176	209	209			202	202	107	107	182	182	163	165	175	175	151	161	181	181	149	149	262	262	243	243	163	163	178	184	96	96
AsALC13	Alcântara, Maranhão	2° 24' 37"S, 44° 24' 22"W	219	219	148	150	229	229	218	222	169	169	172	172	209	209	176	186	200	208	107	107	182	182	163	165	175	175	151	161	181	181	149	149	262	262	243	259	163	163	178	178	96	96
AsALC14	Alcântara, Maranhão	2° 24' 37"S, 44° 24' 22"W	219	227	148	148	207	209	218	218	169	169	172	176	209	209			202	202	107	107	182	182	163	169	175	175	151	161	181	181	149	149	262	262	243	243	163	163	184	184	96	96
AsALC15	Alcântara, Maranhão	2° 24' 37"S, 44° 24' 22"W	219	219	148	148	215	231	218	218	169	169	172	176	209	209					107	107	182	182	161	163	175	175	161	161	181	181	149	149	262	262	243	243	163	163	184	184	96	96
AsALC16	Alcântara, Maranhão	2° 24' 37"S, 44° 24' 22"W	221	227	148	148	229	229	218	224	169	169	176	176	209	211	182	186	202	208	107	107	182	182	163	163	175	175	151	161	181	181	149	149	262	262	243	243	163	163	182	182	96	96
AsALC17	Alcântara, Maranhão	2° 24' 37"S, 44° 24' 22"W	217	221	148	148	215	215	218	218	169	169	172	176	209	209	186	186	202	202	107	107	182	182			175	175	151	151	181	181	149	149	262	262	243	243	163	163	178	178	96	96
AsALC18	Alcântara, Maranhão	2° 24' 37"S, 44° 24' 22"W	223	223	148	148	229	233	218	222	169	169	176	176	209	211	182	182	202	208	107	107	182	182	163	165	175	175	151	151	181	181	149	149	262	262	243	243	163	163	184	184	96	96
AsALC19	Alcântara, Maranhão	2° 24' 37"S, 44° 24' 22"W	223	223	148	148	213	213	218	222	169	169	172	176	209	209	176	176	202	202	107	107	182	182	163	163	175	175	151	151	181	181	149	149	262	262	243	243	163	163	178	178	96	96
AsALC20	Alcântara, Maranhão	2° 24' 37"S, 44° 24' 22"W	219	219	150	150	231	231	218	222	169	169	176	176	209	211	182	182			107	107	182	182	165	165	175	175	151	151	181	181	149	149	262	262	243	243	163	163	178	178	96	96
AsALC21	Alcântara, Maranhão	2° 24' 37"S, 44° 24' 22"W	223	223	148	148	229	229	218	220	169	169	176	176	209	211	176	182	208	208	107	107	182	182	163	165	175	175	151	151	181	181	149	149	262	262	243	243	163	163	178	178	96	96
AsALC22	Alcântara, Maranhão	2° 24' 37"S, 44° 24' 22"W	227	227	148	150	229	231	218	218	169	169	176	176	209	211	176	182	202	202	107	107	182	182	163	165	175	175	151	151	181	181	149	149	262	262	243	243	163	163	178	178	96	96
AsALC23	Alcântara, Maranhão	2° 24' 37"S, 44° 24' 22"W	221	227	148	148	231	231	218	218	169	169	172	172	209	209	186	186	202	202	107	107	182	182	163	163	175	175	161	161	181	181	149	149	262	262	259	259	163	163	178	184	96	96
AsALC24	Alcântara, Maranhão	2° 24' 37"S, 44° 24' 22"W	219	219	148	148	213	213	218	218	169	169			209	211	176	176	202	202	107	107	182	182	163	163	175	175	151	151	181	181	149	149	262	262	243	243	163	163	178	184	96	96
AsALC25	Alcântara, Maranhão	2° 24' 37"S, 44° 24' 22"W	223	223	148	148	229	233	218	218	169	169	172	176	209	211	176	176	200	208	107	107	182	182	165	165	175	175	151	151	181	181	149	149	262	262	243	243	163	163	178	178	96	96
AsALC26	Alcântara, Maranhão	2° 24' 37"S, 44° 24' 22"W	223	223	148	148	213	229	218	218	169	169	172	176	209	211	176	182	200	202	107	107	182	182	163	165	175	175	151	161	181	181	149	149	262	262	243	243	163	163	178	178	96	96
AsALC27	Alcântara, Maranhão	2° 24' 37"S, 44° 24' 22"W	223	227	148	148	209	233	218	218	169	169	172	176	209	209	176	176	202	208	107	107	182	182	163	163	175	175			181	181	149	149	262	262	243	243	163	163	178	178	96	96
AsALC28	Alcântara, Maranhão	2° 24' 37"S, 44° 24' 22"W	223	227	148	148	209	233	218	218	169	169	172	172	209	211	176	176	200	202	107	107	182	182	163	163	175	175	151	151	181	181	149	149	262	262	243	243	163	163	184	184	96	96
AsALC29	Alcântara, Maranhão	2° 24' 37"S, 44° 24' 22"W	219	219	148	148	209	209	218	218	169	169	176	176	209	211	176	182	200	200	107	107	182	182	165	165	175	175	161	161	181	181	149	149	262	262	243	243	163	163	178	178	96	96
AsALC30	Alcântara, Maranhão	2° 24' 37"S, 44° 24' 22"W	227	227	148	148	209	225	218	218	169	169	172	176	209	209	182	182			107	107	182	182	163	163	175	175	151	161	181	181	149	149	262	262	243	259	163	163	184	184	96	96
AsPPR1	Pontal do Paraná, Paraná	25°34'30"S, 48°21'9"W	217	219	154	166	209	209	218	218	169	169	172	176	209	209	184	184	208	208	107	107	176	176	169	169	175	175	151	151	181	181	149	149	262	262	259	261	163	163	178	178	96	96
AsPPR2	Pontal do Paraná, Paraná	25°34'30"S, 48°21'9"W	219	219	156	160	209	209	218	218	169	169	172	176	209	209	184	184	208	208	107	107	176	176	169	169	175	175	151	151	181	181	149	149	262	262	259	259	163	163	178	178	96	96
AsPPR3	Pontal do Paraná, Paraná	25°34'30"S, 48°21'9"W					209	209	218	218	169	169			209	209					107	107	176	176	169	169	175	175	151	151	181	181	149	149	262	262	263	263	163	163	178	178	96	96
AsPPR4	Pontal do Paraná, Paraná	25°34'30"S, 48°21'9"W	211	219	150	158	209	209	218	218	169	169	172	176	209	215	182	184	208	210	107	107	176	176	169	169	175	175	151	151	181	181	149	149	262	262	249	263	163	163	178	178	96	96
AsPPR5	Pontal do Paraná, Paraná	25°34'30"S, 48°21'9"W	213	213	166	166	209	209	218	218	169	169	172	176	209	209	182	184	206	208	107	107	176	176	169	169	175	175	151	151	181	181	149	149	262	262	251	251	163	163	178	178	96	96
AsPPR6	Pontal do Paraná, Paraná	25°34'30"S, 48°21'9"W	213	213	152	152	209	209	218	218	169	169	172	172	209	209	184	184	208	210	107	107	176	176	169	171	175	175	151	151	181	181	149	149	262	262	263	263	163	163	178	178	96	96
AsPPR7	Pontal do Paraná, Paraná	25°34'30"S, 48°21'9"W	219	221	152	158	209	209	218	218	169	169	172	176	209	209	184	184	208	208	107	107	176	176	169	169	175	175	151	151	181	181	149	149	262	262	259	263	163	163	178	178	96	96
AsPPR8	Pontal do Paraná, Paraná	25°34'30"S, 48°21'9"W	219	219	152	154	209	209	218	218	169	169	172	172	209	209	184	184	206	208	107	107	176	176	169	169	175	175	151	151	181	181	149	149	262	262	253	253	163	163	178	178	96	96
AsPPR9	Pontal do Paraná, Paraná	25°34'30"S, 48°21'9"W	219	219	158	162	209	209	218	218	169	169	176	176	209	209			208	208	107	107	176	176	169	169	175	175	151	151	181	181	149	149	262	262	259	259	163	163	178	178	96	96
AsPPR10	Pontal do Paraná, Paraná	25°34'30"S, 48°21'9"W	211	219	158	158	209	209	218	218	169	169	172	172	209	209	184	184	208	208	107	107	176	176	169	169	175	175	151	151	181	181	149	149	262	262	259	263	163	163	178	178	96	96
AsPPR11	Pontal do Paraná, Paraná	25°34'30"S, 48°21'9"W	217	219	148	138	209	209	218	218	167	169	172	176	209	209	182	184	208	208	107	107	176	176	169	169	175	175	151	151	181	181	149	149	262	262	259	263	163	163	178	178	96	96
AsPPR12	Pontal do Paraná, Paraná	25°34'30"S, 48°21'9"W	217	219	156	160	209	209	218	218	169	169	176	176	209	209	184	184	208	208	107	107	176	176	169	169	175	175	151	151	181	181	149	149	262	262	259	259	163	163	178	178	96	96
AsPPR13	Pontal do Paraná, Paraná	25°34'30"S, 48°21'9"W	219	219	152	138	209	209	218	218	169	169	172	176	209	209	182	182	196	196	107	107	176	176	169	169	175	175	151	151	181	181	149	149	262	262	259	259	163	163	178	178	96	96
AsPPR14	Pontal do Paraná, Paraná	25°34'30"S, 48°21'9"W	213	217	154	158	209	209	218	218	169	169	176	176	209	209	182	182	206	208	107	107	176	176	169	175	175	175	151	151	181	181	149	149	262	262	259	263	163	163	178	178	96	96
AsPPR15	Pontal do Paraná, Paraná	25°34'30"S, 48°21'9"W	213	219	152	138	209	209	218	218	167	169	172	176	209	215	184	184	208	210	107	107	176	176	169	171	175	175	151	151	181	181	149	149	262	262	259	259	163	163	178	178	96	96
AsPPR16	Pontal do Paraná, Paraná	25°34'30"S, 48°21'9"W	219	221	150	166	209	209	218	218	169	169	172	172	201	209	184	184	208	208	107	107	176	176	169	169	175	175	151	151	181	181	149	149	262	262	259	263	163	163	178	178	96	96
AsPPR17	Pontal do Paraná, Paraná	25°34'30"S, 48°21'9"W	219	219	150	158	209	209	218	218	169	169	172	172	209	209	182	182	208	208	107	107	176	176	169	169	175	175	151	151	181	181	149	149	262	262	263	263	163	163	178	178	96	96
AsPPR18	Pontal do Paraná, Paraná	25°34'30"S, 48°21'9"W	217	219	152	158	209	209	218	218	169	169	172	176	209	209	182	184	206	206	107	107	176	176	169	169	175	175	151	151	181	181	149	149	262	262	263	263	163	163	178	178	96	96
AsPPR19	Pontal do Paraná, Paraná	25°34'30"S, 48°21'9"W	219	219	158	162	209	209	218	218	169	169	172	172	209	209			210	210	107	107	176	176	169	169	175	175	151	151	181	181	149	149	262	262	259	263	163	163	178	178	96	96
AsPPR20	Pontal do Paraná, Paraná	25°34'30"S, 48°21'9"W	219	219	158	158	209	209	218	218	169	169	176	176	209	209	184	184	208	208	107	107	176	176	169	169	175	175	151	151	181	181	149	149	262	262	259	259	163	163	178	178	96	96
AsPPR21	Pontal do Paraná, Paraná	25°34'30"S, 48°21'9"W	219	219	160	160	209	209	218	218	169	169	176	176	209	209	184	184	208	208	107	107	176	176	169	169	175	175	151	151	181	181	149	149	262	262	259	263	163	163	178	178	96	96
AsPPR22	Pontal do Paraná, Paraná	25°34'30"S, 48°21'9"W	219	219	158	158	209	209	218	218	169	169	172	172	209	209			208	208	107	107	176	176	169	169	175	175	151	151	181	181	149	149	262	262	263	263	163	163	178	178	96	96
AsPPR23	Pontal do Paraná, Paraná	25°34'30"S, 48°21'9"W	219	219	158	162	209	209	218	218	169	169	172	176	209	209	184	186			107	107	176	176	169	169	175	175	151	151	181	181	149	149	262	262	259	263	163	163	178	178	96	96
AsPPR24	Pontal do Paraná, Paraná	25°34'30"S, 48°21'9"W	219	219	160	160	209	209	218	218	169	169	176	176	209	209	184	184	208	208	107	107	176	176	169	169	175	175	151	151	181	181	149	149	262	262	259	259	163	163	178	178	96	96
AsPPR25	Pontal do Paraná, Paraná	25°34'30"S, 48°21'9"W	219	219	160	160	209	209	218	218	169	169	176	176	209	209	184	184	208	208	107	107	176	176	169	169	175	175	151	151	181	181	149	149	262	262	259	259	163	163	178	178	96	96
AsPPR26	Pontal do Paraná, Paraná	25°34'30"S, 48°21'9"W	211	219	132	132	209	209	218	218	169	169	176	176	209	209	182	182	208	208	107	107	176	176	169	169	175	175	151	151	181	181	149	149	262	262	259	259	163	163	178	178	96	96
AsPPR27	Pontal do Paraná, Paraná	25°34'30"S, 48°21'9"W	219	219	154	158	209	209	218	218	159	169	172	172	209	209	184	184	206	208	107	107	176	176	169	169	175	175	151	151	181	181	149	149	262	262	259	259	163	163	178	178	96	96
AsPPR28	Pontal do Paraná, Paraná	25°34'30"S, 48°21'9"W	219	219	158	160	209	209	218	218	169	169	172	176	209	209	184	184	208	208	107	107	176	176	169	169	175	175	151	151	181	181	149	149	262	262	261	261	163	163	178	178	96	96
AsFLN1	Florianópolis, Santa Catarina	27°34'37"S, 48°31'8"W	217	217	158	158	209	209	218	218	169	169	172	176	209	209	184	186	208	208	107	107	176	176	169	169	175	175	151	151	181	181	149	149	262	262	259	259	163	163	178	178	96	96
AsFLN2	Florianópolis, Santa Catarina	27°34'37"S, 48°31'8"W	217	217	150	158	209	209	218	218	169	169	172	176	209	209	184	186	206	208	107	107	176	176	169	169	175	175	151	151	181	181	149	149	262	262	259	259	163	163	178	178	96	96
AsFLN3	Florianópolis, Santa Catarina	27°34'37"S, 48°31'8"W	217	217	158	162	209	209	218	218	169	169	176	176	209	209	182	182	208	208	107	107	176	176	169	169	175	175	151	151	181	181	149	149	262	262	259	259	163	163	178	178	96	96
AsFLN4	Florianópolis, Santa Catarina	27°34'37"S, 48°31'8"W	217	217	158	158	209	209	218	218	169	169	172	172	209	209			208	208	107	107	176	176	169	169	175	175	151	151	181	181	149	149	262	262	259	259	163	163	178	178	96	96
AsFLN5	Florianópolis, Santa Catarina	27°34'37"S, 48°31'8"W	211	217	158	160	209	209	218	218	169	169	172	172	209	209	184	184			107	107	176	176	169	169	175	175	151	151	181	181	149	149	262	262	259	259	163	163	178	178	96	96
AsFLN6	Florianópolis, Santa Catarina	27°34'37"S, 48°31'8"W	215	217	154	162	209	209	218	218	169	169	172	176	209	209	184	184	208	212	107	107	176	176	169	169	175	175	151	151	181	181	149	149	262	262	259	259	163	163	178	178	96	96
AsFLN7	Florianópolis, Santa Catarina	27°34'37"S, 48°31'8"W	217	221	150	160	209	209	218	218	169	169	172	172	209	209	182	184	208	208	107	107	176	176	169	169	175	175	151	151	181	181	149	149	262	262	259	259	163	163	178	178	96	96
AsFLN8	Florianópolis, Santa Catarina	27°34'37"S, 48°31'8"W	217	219	150	150	209	209	218	218	169	169	172	176	209	209	184	184	208	208	107	107	176	176	169	169	175	175	151	151	181	181	149	149	262	262	259	259	163	163	178	178	96	96
AsFLN9	Florianópolis, Santa Catarina	27°34'37"S, 48°31'8"W	213	219	152	158	209	209	218	218	169	169	172	176	209	209	182	184	208	208	107	107	176	176	169	169	175	175	151	151	181	181	149	149	262	262	259	259	163	163	178	178	96	96
AsFLN10	Florianópolis, Santa Catarina	27°34'37"S, 48°31'8"W	217	219	158	158	209	209	218	218	169	169	172	176	209	209	184	184	208	208	107	107	176	176	169	169	175	175	151	151	181	181	149	149	262	262	259	259	163	163	178	178	96	96
AsFLN11	Florianópolis, Santa Catarina	27°34'37"S, 48°31'8"W	217	217	152	158	209	211	218	218	169	169	172	176	209	209	184	184	208	208	107	107	176	176	169	169	175	175	151	151	181	181	149	149	262	262	259	259	163	163	178	178	96	96
AsFLN12	Florianópolis, Santa Catarina	27°34'37"S, 48°31'8"W	219	219	158	158	209	209	218	218	169	169	172	172	209	209			208	208	107	107	176	176	169	169	175	175	151	151	181	181	149	149	262	262	259	259	163	163	178	178	96	96
AsFLN13	Florianópolis, Santa Catarina	27°34'37"S, 48°31'8"W	217	217	160	160	209	209	218	218	169	169	176	176	209	209	184	184			107	107	176	176	169	169	175	175	151	151	181	181	149	149	262	262	259	259	163	163	178	178	96	96
AsFLN14	Florianópolis, Santa Catarina	27°34'37"S, 48°31'8"W	219	219	162	162	209	209	218	218	169	169	172	176	209	209	184	184	208	208	107	107	176	176	169	169	175	175	151	151	181	181	149	149	262	262	259	259	163	163	178	178	96	96
AsFLN15	Florianópolis, Santa Catarina	27°34'37"S, 48°31'8"W	217	217	158	158	209	209	218	218	169	169	172	176	209	209			208	208	107	107	176	176	169	169	175	175	151	151	181	181	149	149	262	262	259	259	163	163	178	178	96	96
AsFLN16	Florianópolis, Santa Catarina	27°34'37"S, 48°31'8"W	217	221	150	160	209	209	218	218	169	169	172	172	209	209	184	184	208	212	107	107	176	176	169	169	175	175	151	151	181	181	149	149	262	262	259	259	163	163	178	178	96	96
AsFLN17	Florianópolis, Santa Catarina	27°34'37"S, 48°31'8"W	217	221	158	158	209	209	218	218	169	169	172	176	209	209	184	184	208	208	107	107	176	176	169	169	175	175	151	151	181	181	149	149	262	262	259	259	163	163	178	178	96	96
AsFLN18	Florianópolis, Santa Catarina	27°34'37"S, 48°31'8"W	213	219	152	158	209	211	218	218	169	169	176	182	209	209	184	184	208	208	107	107	176	176	169	169	175	175	151	151	181	181	149	149	262	262	259	259	163	163	178	178	96	96
AsFLN19	Florianópolis, Santa Catarina	27°34'37"S, 48°31'8"W							218	220	169	169	172	172	209	209	184	186			107	107	176	176	169	169	175	175	151	151	181	181	149	149	262	262	259	259	163	163	178	178	96	96
AsFLN20	Florianópolis, Santa Catarina	27°34'37"S, 48°31'8"W	217	217	160	160	209	209	218	218	169	169	172	176	209	209	184	184	208	208	107	107	176	176	173	173	175	175	151	151	181	181	149	149	262	262	259	259	163	163	178	178	96	96
AsFLN21	Florianópolis, Santa Catarina	27°34'37"S, 48°31'8"W	213	217	154	162	209	209	218	218	169	169	172	176	209	209	184	186	208	208	107	107	176	176	169	169	175	175	151	151	181	181	149	149	262	262	259	259	163	163	178	178	96	96
AsFLN22	Florianópolis, Santa Catarina	27°34'37"S, 48°31'8"W	217	219	150	158	209	209	218	218	169	169	172	176	209	209	184	184	208	208	107	107	176	176	169	169	175	175	151	151	181	181	149	149	262	262	259	259	163	163	178	178	96	96
AsFLN23	Florianópolis, Santa Catarina	27°34'37"S, 48°31'8"W							218	218	169	169	172	172	209	209	184	184			107	107	176	176	169	169	175	175	151	151	181	181	149	149	262	262	259	261	163	163	178	178	96	96
AsFLN24	Florianópolis, Santa Catarina	27°34'37"S, 48°31'8"W	217	217	150	150	209	209	218	218	169	169	172	172	209	209	184	184	208	208	107	107	176	176	169	169	175	175	151	151	181	181	149	149	262	262	259	259	163	163	178	178	96	96
AsFLN25	Florianópolis, Santa Catarina	27°34'37"S, 48°31'8"W							218	218	169	169	176	176	209	209	184	184			107	107	176	176	169	169	175	175	151	151	181	181	149	149	262	262	259	259	163	163	178	178	96	96
AsFLN26	Florianópolis, Santa Catarina	27°34'37"S, 48°31'8"W	217	217	150	160	209	209	218	218	169	169	172	176	209	209	184	182	208	208	107	107	176	176	169	169	175	175	151	151	181	181	149	149	262	262	259	259	163	163	178	178	96	96
AsFLN27	Florianópolis, Santa Catarina	27°34'37"S, 48°31'8"W							218	218	169	169	172	172	209	209	184	184			107	107	176	176	169	169	175	175	151	151	181	181	149	149	262	262	259	261	163	163	178	178	96	96
AsFLN28	Florianópolis, Santa Catarina	27°34'37"S, 48°31'8"W	213	221	152	152	209	209	218	218	169	169	172	176	209	209	184	184	208	208	107	107	176	176	169	169	175	175	151	151	181	181	149	149	262	262	259	263	163	163	178	178	96	96
AsFLN29	Florianópolis, Santa Catarina	27°34'37"S, 48°31'8"W							218	218	169	169	176	176	209	209	184	184	208	208	107	107	176	176	169	169	175	175	151	151	181	181	149	149	262	262	259	263	163	163	178	178	96	96
AsFLN30	Florianópolis, Santa Catarina	27°34'37"S, 48°31'8"W	217	217	154	160	209	209	218	218	169	169	172	172	209	209	184	182	206	208	107	107	176	176	169	169	175	175	151	151	181	181	149	149	262	262	259	259	163	163	178	178	96	96
AsFLN31	Florianópolis, Santa Catarina	27°34'37"S, 48°31'8"W							218	218	169	169	172	172	209	209	184	182	208	208	107	107	176	176	169	169	175	175	151	151	181	181	149	149	262	262	259	263	163	163	178	178	96	96
AsFLN32	Florianópolis, Santa Catarina	27°34'37"S, 48°31'8"W	217	219	158	158	209	209	218	218	169	169	176	176	209	209			208	210	107	107	176	176	169	169	175	175	151	151	181	181	149	149	262	262	259	259	163	163	178	178	96	96
AsFLN33	Florianópolis, Santa Catarina	27°34'37"S, 48°31'8"W							218	218	169	169			209	209	182	184			107	107	176	176	169	169	175	175	151	151	181	181	149	149	262	262	259	259	163	163	178	178	96	96
AsFLN34	Florianópolis, Santa Catarina	27°34'37"S, 48°31'8"W	211	213	158	160	209	209	218	218	169	169	172	176	209	209	182	184	208	208	107	107	176	176	169	169	175	175	151	151	181	181	149	149	262	262	259	259	163	163	178	178	96	96
AsFLN35	Florianópolis, Santa Catarina	27°34'37"S, 48°31'8"W	217	219	152	158	209	209	218	218	169	169	176	176	209	209	182	182	208	208	107	107	176	176	169	169	175	175	151	151	181	181	149	149	262	262	259	259	163	163	178	178	96	96
AsFLN36	Florianópolis, Santa Catarina	27°34'37"S, 48°31'8"W	217	223	158	158	209	213	218	218	169	169	172	172	209	209	182	184	208	208	107	107	176	176	169	169	175	175	151	151	181	181	149	149	262	262	263	263	163	163	178	178	96	96
AsFLN37	Florianópolis, Santa Catarina	27°34'37"S, 48°31'8"W	217	223	158	164	209	213	218	218	169	169	172	176	209	209	182	184	208	208	107	107	176	176	169	169	175	175	151	151	181	181	149	149	262	262	259	259	163	163	178	178	96	96
AsFLN38	Florianópolis, Santa Catarina	27°34'37"S, 48°31'8"W	217	219	158	158	213	213	218	218	169	169	176	176	209	209	184	184	208	208	107	107	176	176	169	169	175	175	151	151	181	181	149	149	262	262	263	263	163	163	178	178	96	96
AsFLN39	Florianópolis, Santa Catarina	27°34'37"S, 48°31'8"W	221	223	152	152	209	209	218	218	169	169	176	176	209	209	182	182	208	208	107	107	176	176	169	169	175	175	151	151	181	181	149	149	262	262	259	259	163	163	178	178	96	96
AsFLN40	Florianópolis, Santa Catarina	27°34'37"S, 48°31'8"W	211	223	152	160	209	209	218	218	169	169	176	176	209	209	184	184	208	208	107	107	176	176	169	169	175	175	151	151	181	181	149	149	262	262	259	259	163	163	178	178	96	96
AsFLN41	Florianópolis, Santa Catarina	27°34'37"S, 48°31'8"W	221	223	160	160	209	209	218	218	169	169	172	176	209	209	182	184	208	208	107	107	176	176	169	169	175	175	151	151	181	181	149	149	262	262	259	259	163	163	178	178	96	96
AsFLN42	Florianópolis, Santa Catarina	27°34'37"S, 48°31'8"W	221	223	152	152	209	209	218	218	169	169	176	176	209	209	182	182	208	208	107	107	176	176	169	169	175	175	151	151	181	181	149	149	262	262	259	259	163	163	178	178	96	96
AsFLN43	Florianópolis, Santa Catarina	27°34'37"S, 48°31'8"W	211	219	150	158	209	209	218	218	169	169	176	176	209	209	184	184	208	208	107	107	176	176	169	169	175	175	151	151	181	181	149	149	262	262	259	259	163	163	178	178	96	96
AsFLN44	Florianópolis, Santa Catarina	27°34'37"S, 48°31'8"W	211	219	158	158	209	209	218	218	169	169	172	172	209	209	184	186			107	107	176	176	169	169	175	175	151	151	181	181	149	149	262	262	259	261	163	163	178	178	96	96
AsFLN45	Florianópolis, Santa Catarina	27°34'37"S, 48°31'8"W	215	217	158	158	209	209	218	218	169	169	176	176	209	209	184	184	208	208	107	107	176	176	169	169	175	175	151	151	181	181	149	149	262	262	259	259	163	163	178	178	96	96
AsFLN46	Florianópolis, Santa Catarina	27°34'37"S, 48°31'8"W	219	221	158	160	209	215	218	218	169	177	176	176	209	209	184	184	208	208	107	107	176	176	169	169	175	175	151	151	181	181	149	149	262	262	259	261	163	163	178	178	96	96
AsFLN47	Florianópolis, Santa Catarina	27°34'37"S, 48°31'8"W	219	221	158	158	209	209	218	218	169	169	172	176	209	209			208	208	107	107	176	176	169	169	175	175	151	151	181	181	149	149	262	262	259	261	163	163	178	178	96	96
AsFLN48	Florianópolis, Santa Catarina	27°34'37"S, 48°31'8"W	221	221	156	156	209	209	218	218	169	169	172	176	209	209	184	186	208	208	107	107	176	176	169	169	175	175	151	151	181	181	149	149	262	262	259	259	163	163	178	178	96	96
AsFLN49	Florianópolis, Santa Catarina	27°34'37"S, 48°31'8"W	217	217	150	152	209	209	218	218	169	169	176	176	209	209	184	186	206	206	107	107	176	176	169	169	175	175	151	151	181	181	149	149	262	262	259	259	163	163	178	178	96	96
AsFLN50	Florianópolis, Santa Catarina	27°34'37"S, 48°31'8"W	217	223	150	158	209	209	218	220	169	169	176	176	209	209			208	208	107	107	176	176	169	169	175	175	151	151	181	181	149	149	262	262	245	259	163	163	178	178	96	96
AsFLN51	Florianópolis, Santa Catarina	27°34'37"S, 48°31'8"W	217	219	158	158	209	209	218	218	169	169	172	176	209	209	186	184	212	212	107	107	176	176	169	169	175	175	151	151	181	181	149	149	262	262	259	263	163	163	178	178	96	96
AsFLN52	Florianópolis, Santa Catarina	27°34'37"S, 48°31'8"W	217	219	158	158	209	209	218	218	169	169	176	176	209	209	182	184	208	208	107	107	176	176	169	169	175	175	151	151	181	181	149	149	262	262	259	259	163	163	178	178	96	96
AsFLN53	Florianópolis, Santa Catarina	27°34'37"S, 48°31'8"W	213	217			209	209	218	218	169	169	176	176	209	209	184	184	208	208	107	107	176	176	169	169	175	175	151	151	181	181	149	149	262	262	259	259	163	163	178	178	96	96
AsFLN54	Florianópolis, Santa Catarina	27°34'37"S, 48°31'8"W	219	221	148	158	209	209	218	218	169	169	176	176	209	209	184	184	208	208	107	107	176	176	169	169	175	175	151	151	181	181	149	149	262	262	259	261	163	163	178	178	96	96
AsFLN55	Florianópolis, Santa Catarina	27°34'37"S, 48°31'8"W	211	219	152	160	209	209	218	218	169	169	176	176	209	209	184	184	208	208	107	107	176	176	169	169	175	175	151	151	181	181	149	149	262	262	259	259	163	163	178	178	96	96
AsFLN56	Florianópolis, Santa Catarina	27°34'37"S, 48°31'8"W	221	221	152	160	209	209	218	218	169	169	172	176	209	209	184	184	208	208	107	107	176	176	169	169	175	175	151	151	181	181	149	149	262	262	259	263	163	163	178	178	96	96
AsFLN57	Florianópolis, Santa Catarina	27°34'37"S, 48°31'8"W	219	221	154	158	209	209	218	218	169	169	172	176	209	209	184	184	208	208	107	107	176	176	169	169	175	175	151	151	181	181	149	149	262	262	259	261	163	163	178	178	96	96
AsFLN58	Florianópolis, Santa Catarina	27°34'37"S, 48°31'8"W	213	221	150	154	209	209	218	218	169	171	172	176	209	209	184	184	208	210	107	107	176	176	169	169	175	175	151	151	181	181	149	149	262	262	259	259	163	163	178	178	96	96
AsFLN59	Florianópolis, Santa Catarina	27°34'37"S, 48°31'8"W	219	221	158	160	209	213	218	218	169	169	172	172	209	209			206	210	107	107	176	176	169	169	175	175	151	151	181	181	149	149	262	262	259	263	163	163	178	178	96	96
AsFLN60	Florianópolis, Santa Catarina	27°34'37"S, 48°31'8"W	219	221	158	158	209	209	218	218	169	169	176	176	209	209	184	184	208	208	107	107	176	176	169	169	175	175	151	151	181	181	149	149	262	262	259	259	163	163	178	178	96	96
AsFLN61	Florianópolis, Santa Catarina	27°34'37"S, 48°31'8"W	219	219	158	158	209	209	218	218	169	169	176	176	209	209	182	182	206	206	107	107	176	176	169	169	175	175	151	151	181	181	149	149	262	262	259	259	163	163	178	178	96	96
AsFLN62	Florianópolis, Santa Catarina	27°34'37"S, 48°31'8"W	217	217	158	158	209	209	218	218	169	169	176	176	209	209	184	186	208	208	107	107	176	176	169	169	175	175	151	151	181	181	149	149	262	262	259	259	163	163	178	178	96	96
AsFLN63	Florianópolis, Santa Catarina	27°34'37"S, 48°31'8"W	219	219	158	160	209	209	218	218	169	169	172	176	209	209	182	182	204	206	107	107	176	176	169	169	175	175	151	151	181	181	149	149	262	262	259	259	163	163	178	178	96	96
AsFLN64	Florianópolis, Santa Catarina	27°34'37"S, 48°31'8"W	211	217	158	160	209	209	218	218	169	169	172	172	209	209	182	184	210	214	107	107	176	176	169	169	175	175	151	151	181	181	149	149	262	262	259	261	163	163	178	178	96	96
AsFLN65	Florianópolis, Santa Catarina	27°34'37"S, 48°31'8"W	217	217	158	158	209	209	218	218	169	169	176	176	209	209	184	186	208	208	107	107	176	176	169	169	175	175	151	151	181	181	149	149	262	262	259	259	163	163	178	178	96	96
AsFLN66	Florianópolis, Santa Catarina	27°34'37"S, 48°31'8"W	217	221	158	158	209	209	218	218	169	169	172	176	209	209	186	188	208	208	107	107	176	176	169	169	175	175	151	151	181	181	149	149	262	262	259	259	163	163	178	178	96	96
AsCNN1	Cananéia, São Paulo	25° 1'12"S, 47°55'5"W	217	221	158	158	209	209	218	218	169	169	172	176	209	209	180	180	210	210	107	107	176	176	169	169	175	175	151	151	181	181	149	149	262	262			163	163	178	178	96	96
AsCNN2	Cananéia, São Paulo	25° 1'12"S, 47°55'5"W	213	219	152	154	209	209	218	218	169	169	172	172	209	209	180	182	206	206	107	107	176	176	169	169	175	175	151	151	181	181	149	149	262	262	259	259	163	163	178	178	96	96
AsCNN3	Cananéia, São Paulo	25° 1'12"S, 47°55'5"W	211	217	152	154	209	209	218	218	169	169	172	176	199	209	180	182	206	206	107	107	176	176	169	169	175	175	151	151	181	181	149	149	262	262	259	261	163	163	178	178	96	96
AsCNN4	Cananéia, São Paulo	25° 1'12"S, 47°55'5"W			154	154	209	209	218	218	169	169	172	176	199	209			206	206	107	107	176	176	169	169	175	175	151	151	181	181	149	149	262	262	259	259	163	163	178	178	96	96
AsCNN5	Cananéia, São Paulo	25° 1'12"S, 47°55'5"W	213	217	152	158	209	209			169	169	172	172	209	209	180	184	206	208	107	107	176	176	169	169	175	175	151	151	181	181	149	149	262	262	259	259	163	163	178	178	96	96
AsCNN6	Cananéia, São Paulo	25° 1'12"S, 47°55'5"W	209	219	152	158	209	209	218	218	169	169	172	176	209	209	180	186	206	208	107	107	176	176	169	169	175	175	151	151	181	181	149	149	262	262	259	259	163	163	178	178	96	96
AsCNN8	Cananéia, São Paulo	25° 1'12"S, 47°55'5"W	213	217	152	158	209	209	218	218	169	169	172	176	209	209	180	180	204	206	107	107	176	176	169	169	175	175	151	151	181	181	149	149	262	262	259	261	163	163	178	178	96	96
AsCNN10	Cananéia, São Paulo	25° 1'12"S, 47°55'5"W	217	217	152	152	209	209	218	218	169	169	172	172	209	209	180	180	204	208	107	107	176	176	169	169	175	175	151	151	181	181	149	149	262	262	259	261	163	163	178	178	96	96
AsCNN11	Cananéia, São Paulo	25° 1'12"S, 47°55'5"W	215	217	152	152	209	209	218	218	169	169	172	172	209	209	180	180	204	206	107	107	176	176	169	169	175	175	151	151	181	181	149	149	262	262	259	261	163	163	178	178	96	96
AsCNN12	Cananéia, São Paulo	25° 1'12"S, 47°55'5"W	215	217	152	158	209	209	218	218	169	169	172	172	209	209	180	182	204	204	107	107	176	176	169	169	175	175	151	151	181	181	149	149	262	262	259	259	163	163	178	178	96	96
AsCNN13	Cananéia, São Paulo	25° 1'12"S, 47°55'5"W	209	219	158	158	209	211	218	218	169	169	170	172	209	209	180	182	206	210	107	107	176	176	169	169	175	175	151	151	181	181	149	149	262	262	259	259	163	163	178	178	96	96
AsCNN14	Cananéia, São Paulo	25° 1'12"S, 47°55'5"W	219	219	150	150	209	209	218	218	169	169	172	172	209	209	180	182	206	206	107	107	176	176	169	169	175	175	151	151	181	181	149	149	262	262	259	259	163	163	178	178	96	96
AsCNN15	Cananéia, São Paulo	25° 1'12"S, 47°55'5"W	213	219	152	158	209	209	218	218	169	169	172	176	199	209	180	184	206	208	107	107	176	176	169	169	175	175	151	151	181	181	149	149	262	262	259	259	163	163	178	178	96	96
AsCNN16	Cananéia, São Paulo	25° 1'12"S, 47°55'5"W	219	219	152	152	209	209	218	218	169	169	172	172	209	209	180	182	206	206	107	107	176	176	169	169	175	175	151	151	181	181	149	149	262	262	259	261	163	163	178	178	96	96
AsCNN17	Cananéia, São Paulo	25° 1'12"S, 47°55'5"W			158	160	209	209	218	218	169	169	176	176	209	209	180	182	206	206	107	107	176	176	169	169	175	175	151	151	181	181	149	149	262	262	259	259	163	163	178	178	96	96
AsCNN18	Cananéia, São Paulo	25° 1'12"S, 47°55'5"W	213	219	152	158	209	209	218	218	169	169	170	172	209	209	182	184	208	208	107	107	176	176	169	169	175	175	151	151	181	181	149	149	262	262			163	163	178	178	96	96
AsCNN19	Cananéia, São Paulo	25° 1'12"S, 47°55'5"W	219	219	152	152	209	209	218	218	169	169	172	172	209	209	180	182			107	107	176	176	169	169	175	175	151	151	181	181	149	149	262	262	259	259	163	163	178	178	96	96
AsCNN20	Cananéia, São Paulo	25° 1'12"S, 47°55'5"W	213	217	152	152	209	209			169	169	172	172	209	209	180	182	206	206	107	107	176	176	169	169	175	175	151	151	181	183	149	149	262	262	259	259	163	163	178	178	96	96
AsCNN22	Cananéia, São Paulo	25° 1'12"S, 47°55'5"W	213	219	152	152	209	209	218	218	169	169	172	172	209	209	180	182			107	107	176	176	169	169	175	175	151	151	181	181	149	149	262	262	259	263	163	163	178	178	96	96
AsCNN23	Cananéia, São Paulo	25° 1'12"S, 47°55'5"W	213	213	158	158	209	209	218	218	169	169	172	172	209	209	180	180	206	206	107	107	176	176	167	167	175	175	151	151	181	181	149	149	262	262	259	263	163	163	178	178	96	96
AsCNN24	Cananéia, São Paulo	25° 1'12"S, 47°55'5"W	213	219	152	154	209	209	218	218	169	169	172	176	209	209	180	180	206	210	107	107	176	176	169	169	175	175	151	151	181	181	149	149	262	262	259	263	163	163	178	178	96	96
AsCNN25	Cananéia, São Paulo	25° 1'12"S, 47°55'5"W	217	219	160	162	209	209	218	218	169	169	172	176	209	209	178	182	204	206	107	107	176	176	169	169	175	175	151	151	181	181	149	149	262	262	259	259	163	163	178	178	96	96
AsCNN26	Cananéia, São Paulo	25° 1'12"S, 47°55'5"W	219	219	152	152	209	209	218	218	169	169	172	176	199	209	180	180	204	206	107	107	176	176	169	169	175	175	151	151	181	181	149	149	262	262	259	259	163	163	178	178	96	96
AsCNN27	Cananéia, São Paulo	25° 1'12"S, 47°55'5"W	213	219	158	160	209	209	218	218	169	169	172	172	209	209	182	182	204	208	107	107	176	176	169	169	175	175	151	151	181	181	149	149	262	262	259	259	163	163	178	178	96	96
AsCNN28	Cananéia, São Paulo	25° 1'12"S, 47°55'5"W	219	219	150	152	209	209	218	220	169	169	172	172	209	209	180	182			107	107	176	176	169	169	175	175	151	151	181	181	149	149	262	262	259	261	163	163	178	178	96	96
AsCNN29	Cananéia, São Paulo	25° 1'12"S, 47°55'5"W	213	213	152	152	209	209	218	218	169	169	172	172	209	209	182	182	206	210	107	107	176	176	169	169	175	175	151	151	181	181	149	149	262	262	259	261	163	163	178	178	96	96
AsCNN30	Cananéia, São Paulo	25° 1'12"S, 47°55'5"W	213	213	152	152	209	209	218	218	169	169	172	172	209	209	180	182	206	206	107	107	176	176	169	169	175	175	151	151	181	181	149	149	262	262	259	261	163	163	178	178	96	96
AsCNN31	Cananéia, São Paulo	25° 1'12"S, 47°55'5"W	209	219	152	158	209	209	218	218	169	169	172	172	209	209	180	180	204	206	107	107	176	176	169	169	175	175	151	151	181	181	149	149	262	262	259	259	163	163	178	178	96	96
AsCNN32	Cananéia, São Paulo	25° 1'12"S, 47°55'5"W	219	221	154	158	209	209	218	220	169	169	172	172	209	209	182	184	204	204	107	107	176	176	169	169	175	175	151	151	181	181	149	149	262	262	259	259	163	163	178	178	96	96
AsCNN33	Cananéia, São Paulo	25° 1'12"S, 47°55'5"W	213	213	152	152	209	209	218	218	169	169	176	176	209	209	184	184	204	204	107	107	176	176	169	169	175	175	151	151	181	181	149	149	262	262	259	259	163	163	178	178	96	96
AsCNN34	Cananéia, São Paulo	25° 1'12"S, 47°55'5"W	213	219	152	158	209	209	218	218	169	169	172	172	209	209	180	182			107	107	176	176	169	169	175	175	151	151	181	181	149	149	262	262	259	259	163	163	178	178	96	96
AsCNN35	Cananéia, São Paulo	25° 1'12"S, 47°55'5"W	213	217	154	158	209	209	218	218	169	169	172	172	209	209	180	180	206	206	107	107	176	176	169	169	175	175	151	151	181	181	149	149	262	262	259	263	163	163	178	178	96	96
AsUBA1	Ubatuba, São Paulo	23° 29' 22"S, 45° 9' 52"W	221	221	158	158	209	209	218	218	169	169	172	176	209	209	186	186	202	208	107	107	176	176	171	171	175	175	151	151	181	181	149	149	262	262	259	259	163	163	178	178	96	96
AsUBA2	Ubatuba, São Paulo	23° 29' 22"S, 45° 9' 52"W	221	221	158	158	209	209	218	218	169	169	172	172	209	209	186	186	208	208	107	107	176	176	171	171	175	175	151	151	181	181	149	149	262	262	259	259	163	163	178	178	96	96
AsUBA3	Ubatuba, São Paulo	23° 29' 22"S, 45° 9' 52"W	219	221	158	158	209	209	218	218	169	169	172	172	209	209	186	186	208	208	107	107	176	176	171	171	175	175	151	151	181	181	149	149	262	262	259	259	163	163	178	178	96	96
AsUBA4	Ubatuba, São Paulo	23° 29' 22"S, 45° 9' 52"W	221	221	158	158	209	209	218	218	169	169	172	172	209	209	186	186	208	208	107	107	176	176	171	171	175	175	151	151	181	181	149	149	262	262	259	263	163	163	178	178	96	96
AsUBA5	Ubatuba, São Paulo	23° 29' 22"S, 45° 9' 52"W	219	219	158	158	209	209	218	218	169	169	172	172	209	209	186	186	208	208	107	107	176	176	171	171	175	175	151	151	181	181	149	149	262	262	259	259	163	163	178	178	96	96
AsUBA6	Ubatuba, São Paulo	23° 29' 22"S, 45° 9' 52"W	211	221	158	158	209	209	218	218	169	169	172	172	209	209	186	186	208	208	107	107	176	176	171	171	175	175	151	151	181	181	149	149	262	262	259	259	163	163	178	178	96	96
AsUBA7	Ubatuba, São Paulo	23° 29' 22"S, 45° 9' 52"W	221	221	158	158	209	209	218	218	169	169	172	172	209	209	186	186			107	107	176	176	171	171	175	175	151	151	181	181	149	149	262	262	259	259	163	163	178	178	96	96
AsUBA8	Ubatuba, São Paulo	23° 29' 22"S, 45° 9' 52"W	221	221	158	158	209	209	218	218	169	169	172	172	209	209	180	186	208	208	107	107	176	176	171	171	175	175	151	151	181	181	149	149	262	262	259	259	163	163	178	178	96	96
AsUBA9	Ubatuba, São Paulo	23° 29' 22"S, 45° 9' 52"W	221	221	158	158	209	209	218	218	169	169	172	176	209	209	180	186	208	204	107	107	176	176	171	171	175	175	151	151	181	181	149	149	262	262	259	263	163	163	178	178	96	96
AsUBA10	Ubatuba, São Paulo	23° 29' 22"S, 45° 9' 52"W	221	221	158	158	209	209	218	218	169	169	172	176	209	209	186	186			107	107	176	176	171	171	175	175	151	151	181	181	149	149	262	262	259	259	163	163	178	178	96	96
AsUBA11	Ubatuba, São Paulo	23° 29' 22"S, 45° 9' 52"W	219	219	158	158	209	209	218	218	169	169	172	172	209	209	186	186	208	208	107	107	176	176	171	171	175	175	151	151	181	181	149	149	262	262	259	259	163	163	178	178	96	96
AsUBA12	Ubatuba, São Paulo	23° 29' 22"S, 45° 9' 52"W	219	219	158	158	209	209	218	218	169	169	172	172	209	209	186	186	208	208	107	107	176	176	171	171	175	175	151	151	181	181	149	149	262	262	259	259	163	163	178	178	96	96
AsUBA13	Ubatuba, São Paulo	23° 29' 22"S, 45° 9' 52"W	221	221	158	158	209	209	218	218	169	169	176	176	209	209	180	186	202	208	107	107	176	176	171	171	175	175	151	151	181	181	149	149	262	262	259	263	163	163	178	178	96	96
AsUBA14	Ubatuba, São Paulo	23° 29' 22"S, 45° 9' 52"W	221	221	158	158	209	209	218	218	169	169	176	176	209	209	180	180	202	202	107	107	176	176	167	167	175	175	151	151	181	181	149	149	262	262	259	259	163	163	178	178	96	96
AsUBA15	Ubatuba, São Paulo	23° 29' 22"S, 45° 9' 52"W	221	221	158	158	209	209	218	218	169	169	172	172	209	209	186	186	208	208	107	107	176	176	171	171	175	175	151	151	181	181	149	149	262	262	259	259	163	163	178	178	96	96
AsUBA16	Ubatuba, São Paulo	23° 29' 22"S, 45° 9' 52"W	221	221	158	158	209	209	218	218	169	169	172	172	209	209	180	186	208	208	107	107	176	176	171	171	175	175	151	151	181	181	149	149	262	262	259	259	163	163	178	178	96	96
AsUBA17	Ubatuba, São Paulo	23° 29' 22"S, 45° 9' 52"W	219	219	158	158	209	209	218	218	169	169	172	176	209	209	186	186	208	208	107	107	176	176	171	171	175	175	151	151	181	181	149	149	262	262	259	259	163	163	178	178	96	96
AsUBA18	Ubatuba, São Paulo	23° 29' 22"S, 45° 9' 52"W	219	219	158	158	209	209	218	218	169	169	176	176	209	209	186	186	208	208	107	107	176	176	171	171	175	175	151	151	181	181	149	149	262	262	259	259	163	163	178	178	96	96
AsUBA19	Ubatuba, São Paulo	23° 29' 22"S, 45° 9' 52"W	221	221	158	158	209	209	218	218	169	169	176	176	209	209	186	186	204	208	107	107	176	176	171	171	175	175	151	151	181	181	149	149	262	262	259	259	163	163	178	178	96	96
AsUBA20	Ubatuba, São Paulo	23° 29' 22"S, 45° 9' 52"W	221	221	158	158	209	209	218	218	169	169	176	176	209	209	186	186			107	107	176	176	171	171	175	175	151	151	181	181	149	149	262	262	259	259	163	163	178	178	96	96
AsUBA21	Ubatuba, São Paulo	23° 29' 22"S, 45° 9' 52"W	219	219	158	158	209	209	218	218	169	169	172	176	209	209	186	186	208	208	107	107	176	176	171	171	175	175	151	151	181	181	149	149	262	262	259	259	163	163	178	178	96	96
AsUBA22	Ubatuba, São Paulo	23° 29' 22"S, 45° 9' 52"W	219	219	158	158	209	209	218	218	169	169	176	176	209	209	186	186			107	107	176	176	171	171	175	175	151	151	181	181	149	149	262	262	259	259	163	163	178	178	96	96
AsUBA23	Ubatuba, São Paulo	23° 29' 22"S, 45° 9' 52"W	221	221	158	158	209	209	218	218	169	169	176	176	209	209	186	186			107	107	176	176	171	171	175	175	151	151	181	181	149	149	262	262	259	259	163	163	178	178	96	96
AsUBA24	Ubatuba, São Paulo	23° 29' 22"S, 45° 9' 52"W	219	219	158	158	209	209	218	218	169	169			209	209	186	186			107	107	176	176	171	171	175	175	151	151	181	181	149	149	262	262	259	259	163	163	178	178	96	96
AsUBA25	Ubatuba, São Paulo	23° 29' 22"S, 45° 9' 52"W	221	221	158	158	209	209	218	218	169	169	172	176	209	209	180	186	202	208	107	107	176	176	171	171	175	175	151	151	181	181	149	149	262	262	259	259	163	163	178	178	96	96
AsUBA26	Ubatuba, São Paulo	23° 29' 22"S, 45° 9' 52"W	221	221	158	158	209	209	218	218	169	169	176	176	209	209	180	186	202	208	107	107	176	176	171	171	175	175	151	151	181	181	149	149	262	262	259	259	163	163	178	178	96	96
AsUBA27	Ubatuba, São Paulo	23° 29' 22"S, 45° 9' 52"W	219	219	158	158	209	209	218	218	169	169	176	176	209	209	186	186			107	107	176	176	171	171	175	175	151	151	181	181	149	149	262	262	259	259	163	163	178	178	96	96
AsUBA28	Ubatuba, São Paulo	23° 29' 22"S, 45° 9' 52"W	221	221	158	158	209	209	218	218	169	169	172	176	209	209	186	186	208	208	107	107	176	176	171	171	175	175	151	151	181	181	149	149	262	262	259	259	163	163	178	178	96	96
AsUBA29	Ubatuba, São Paulo	23° 29' 22"S, 45° 9' 52"W	219	219	158	158	209	209	218	218	169	169	176	176	209	209	186	186	208	208	107	107	176	176	171	171	175	175	151	151	181	181	149	149	262	262	259	259	163	163	178	178	96	96
AsUBA30	Ubatuba, São Paulo	23° 29' 22"S, 45° 9' 52"W	221	221	158	158	209	209	218	218	169	169	176	176	209	209	180	180	204	204	107	107	176	176	171	171	175	175	151	151	181	181	149	149	262	262	259	259	163	163	178	178	96	96
AsUBA31	Ubatuba, São Paulo	23° 29' 22"S, 45° 9' 52"W	221	221	158	158	209	209	218	218	169	169	176	176	209	209	186	186	208	208	107	107	176	176	171	171	175	175	151	151	181	181	149	149	262	262	259	259	163	163	178	178	96	96
AsUBA32	Ubatuba, São Paulo	23° 29' 22"S, 45° 9' 52"W	219	219	158	158	209	209	218	218	169	169	172	176	209	209	186	186	208	208	107	107	176	176	171	171	175	175	151	151	181	181	149	149	262	262	259	259	163	163	178	178	96	96
AsPRC1	Paracuru, Ceará	3° 24' 47"S, 39° 3' 23"W	219	221	150	150	209	227	218	218	169	169	172	176	211	211	174	174	202	202	107	107	176	176	163	163	175	175	161	163	181	181	149	149	262	262	259	259	163	163	178	178	96	96
AsPRC2	Paracuru, Ceará	3° 24' 47"S, 39° 3' 23"W	219	219	150	150	209	209			169	169	176	176	211	211	174	174	200	200	107	107	176	176	163	163	175	175	161	161	181	181	149	149	262	262	259	259	163	163	178	178	96	96
AsPRC3	Paracuru, Ceará	3° 24' 47"S, 39° 3' 23"W	219	221	150	150	209	209	218	222	169	169	176	176	211	211	174	174	200	202	107	107	176	176	163	163	175	175	161	161	181	181	149	149	262	262	243	259	163	163	178	178	96	96
AsPRC4	Paracuru, Ceará	3° 24' 47"S, 39° 3' 23"W	219	219	150	150	209	209			169	169	176	176	211	211	174	174			107	107	176	176	163	163	175	175	161	161	181	181	149	149	262	262	243	259	163	163	178	178	96	96
AsPRC5	Paracuru, Ceará	3° 24' 47"S, 39° 3' 23"W	219	219	150	150	227	227	218	218	169	169	172	176	211	211	174	184	202	202	107	107	176	176	163	163	175	175	161	161	181	181	149	149	262	262	259	259	163	163	178	178	96	96
AsPRC6	Paracuru, Ceará	3° 24' 47"S, 39° 3' 23"W	219	219			209	209	218	218	169	169	176	176	211	211	174	174	200	200	107	107	176	176	163	163	175	175	161	161	181	181	149	149	262	262	259	259	163	163	178	178	96	96
AsPRC7	Paracuru, Ceará	3° 24' 47"S, 39° 3' 23"W	219	221	150	150	209	209	218	218	169	169	176	176	211	211	174	174	200	200	107	107	176	176	163	163	175	175	161	161	181	181	149	149	262	262	243	259	163	163	178	178	96	96
AsPRC8	Paracuru, Ceará	3° 24' 47"S, 39° 3' 23"W			150	150	209	209			169	169	176	176	211	211	174	174			107	107	176	176	163	163	175	175			181	181	149	149	262	262	243	259	163	163	178	178	96	96
AsPRC9	Paracuru, Ceará	3° 24' 47"S, 39° 3' 23"W	219	219	150	150	209	227	218	218	169	169	172	176	211	211	174	184	200	200	107	107	176	176	163	163	175	175	161	163	181	181	149	149	262	262	259	259	163	163	178	178	96	96
AsPRC10	Paracuru, Ceará	3° 24' 47"S, 39° 3' 23"W	219	219	150	150	209	209	218	222	169	169	176	176	211	211	174	184	200	202	107	107	176	176	163	163	175	175	161	163	181	181	149	149	262	262	243	259	163	163	178	178	96	96
AsPRC11	Paracuru, Ceará	3° 24' 47"S, 39° 3' 23"W					209	209			169	169			211	211					107	107	176	176	163	163	175	175			181	181	149	149	262	262			163	163	178	178	96	96
AsPRC12	Paracuru, Ceará	3° 24' 47"S, 39° 3' 23"W	219	221	150	150	209	227	218	218	169	169	176	176	211	211	174	174	200	202	107	107	176	176	163	163	175	175	161	161	181	181	149	149	262	262	243	259	163	163	178	178	96	96
AsPRC13	Paracuru, Ceará	3° 24' 47"S, 39° 3' 23"W			150	172					169	169			211	211	174	174			107	107	176	176	163	163	175	175			181	181	149	149	262	262			163	163	178	178	96	96
AsPRC14	Paracuru, Ceará	3° 24' 47"S, 39° 3' 23"W	219	221	150	150	209	209	218	218	169	169	176	176	211	211	174	174	200	200	107	107	176	176	163	163	175	175	161	161	181	181	149	149	262	262	259	259	163	163	178	178	96	96
AsPRC15	Paracuru, Ceará	3° 24' 47"S, 39° 3' 23"W	219	221			209	227	218	218	169	169	176	176	211	211	174	174			107	107	176	176	163	163	175	175	161	161	181	181	149	149	262	262	259	259	163	163	178	178	96	96
AsPRC16	Paracuru, Ceará	3° 24' 47"S, 39° 3' 23"W	219	219	150	150	209	209	218	222	169	169	176	176	211	211	174	174			107	107	176	176	163	163	175	175	161	161	181	181	149	149	262	262	259	259	163	163	178	178	96	96
AsPRC17	Paracuru, Ceará	3° 24' 47"S, 39° 3' 23"W									169	169			211	211	174	174			107	107	176	176	163	163	175	175			181	181	149	149	262	262			163	163	178	178	96	96
AsPRC18	Paracuru, Ceará	3° 24' 47"S, 39° 3' 23"W	219	221	150	150	209	227	218	218	169	169	176	176	211	211	174	174	200	202	107	107	176	176	163	163	175	175	161	161	181	181	149	149	262	262	259	259	163	163	178	178	96	96
AsPRC19	Paracuru, Ceará	3° 24' 47"S, 39° 3' 23"W	219	219	150	150	227	227			169	169	172	172	211	211					107	107	176	176	163	163	175	175	163	163	181	181	149	149	262	262	259	259	163	163	178	178	96	96
AsPRC20	Paracuru, Ceará	3° 24' 47"S, 39° 3' 23"W									169	169			211	211					107	107	176	176	163	163	175	175			181	181	149	149	262	262			163	163	178	178	96	96
AsPRC21	Paracuru, Ceará	3° 24' 47"S, 39° 3' 23"W	219	219	150	150	209	227	218	218	169	169	176	176	211	211	174	174	200	202	107	107	176	176	163	163	175	175	161	161	181	181	149	149	262	262	259	259	163	163	178	178	96	96
AsPRC22	Paracuru, Ceará	3° 24' 47"S, 39° 3' 23"W	219	219	150	150	227	227	222	222	169	169	172	176	211	211	184	184	200	202	107	107	176	176	163	163	175	175	161	161	181	181	149	149	262	262	259	259	163	163	178	178	96	96
AsPRC23	Paracuru, Ceará	3° 24' 47"S, 39° 3' 23"W	219	219	150	150	209	227	218	222	169	169	176	176	211	211			202	202	107	107	176	176	163	163	175	175	161	161	181	181	149	149	262	262	243	243	163	163	178	178	96	96
AsPRC24	Paracuru, Ceará	3° 24' 47"S, 39° 3' 23"W	219	219	150	150	227	227	218	218	169	169	172	176	211	211	174	174	202	202	107	107	176	176	163	163	175	175	161	161	181	181	149	149	262	262	243	259	163	163	178	178	96	96
AsPRC25	Paracuru, Ceará	3° 24' 47"S, 39° 3' 23"W	221	221	150	150	209	227	218	218	169	169	176	176	211	211	174	174	200	200	107	107	176	176	163	163	175	175	161	161	181	181	149	149	262	262	243	259	163	163	178	178	96	96
AsPRC26	Paracuru, Ceará	3° 24' 47"S, 39° 3' 23"W	219	219	150	150	209	209	222	222	169	169	176	176	211	211	174	174	202	202	107	107	176	176	163	163	175	175	163	163	181	181	149	149	262	262	259	259	163	163	178	178	96	96
AsPRC27	Paracuru, Ceará	3° 24' 47"S, 39° 3' 23"W			150	150	209	209			169	169	172	176	211	211	174	174			107	107	176	176	163	163	175	175	161	161	181	181	149	149	262	262			163	163	178	178	96	96
AsPRC28	Paracuru, Ceará	3° 24' 47"S, 39° 3' 23"W	219	219	150	150	209	227			169	169	172	176	211	211	174	184			107	107	176	176	163	163	175	175	161	163	181	181	149	149	262	262	259	259	163	163	178	178	96	96
AsPRC29	Paracuru, Ceará	3° 24' 47"S, 39° 3' 23"W	219	219	150	150	209	209	218	222	169	169	176	176	209	211	174	184	202	202	107	107	176	176	163	163	175	175	161	163	181	181	149	149	262	262	243	259	163	163	178	178	96	96
AsPRC30	Paracuru, Ceará	3° 24' 47"S, 39° 3' 23"W	219	221	150	150	209	209			169	169	176	176	211	211					107	107	176	176	163	163	175	175	161	161	181	181	149	149	262	262	243	259	163	163	178	178	96	96
AsPRC31	Paracuru, Ceará	3° 24' 47"S, 39° 3' 23"W	221	221	158	158	227	227			169	169	176	176	211	211	174	174	200	200	107	107	176	176	163	163	175	175	161	161	181	181	149	149	262	262	259	259	163	163	178	178	96	96

## Sheet: Aschaueriana_matingsystem
sampleID	Aschau1-01		Aschau1-02		Aschau1-03		Aschau1-04		Aschau1-05		Aschau1-06		Aschau1-07		Aschau1-08		Aschau1-09		Agerm1-02		Agerm1-03		Agerm1-18		T7
As96	221	221	148	148	229	237	218	220	169	179	172	176	209	211	174	174	202	212	182	182	165	165	241	243	178	178
As96P1	221	221	148	148	237	237	218	218					211	211	174	174	202	204	182	182	165	165	241	241	178	178
As96P2	221	221	148	148	229	237	220	220	169	169	172	176	209	211	174	174	202	212	182	182	165	165	241	241	178	178
As96P3	221	221	148	148	229	237	218	220			176	176	209	211	174	174	202	212	182	182	165	165	241	241	178	178
As96P4	221	221	148	148	229	229	218	220	179	179	172	176	209	211	174	174	212	212	182	182	165	165	241	241	178	178
As96P5	215	221	148	148	213	229	218	220	179	179	176	176	211	211			202	210	182	186	165	165	241	241	178	178
As96P6	221	221	148	148	229	229	218	220	179	179	172	176	209	209	174	174	212	212	182	182	165	165	241	243	178	178
As96P7	219	221	148	148	229	229	218	218	179	179	172	176	209	209	174	174	202	208	182	182	165	165	241	243	178	178
As96P8	221	221	148	148	229	237	220	220	169	179	172	176	211	213	174	174	200	212	182	182	165	165	241	241	178	178
As96P9	221	221	148	148	229	237	218	220	169	179	172	176	209	209	174	174	212	212	182	182	165	165	241	243	178	178
As96P10	219	221	148	148	225	229	218	220	169	179	172	172			174	180	198	202	182	182	165	165	241	241	178	178
As96P11	221	221	148	148	229	229	220	220	169	179	172	172	209	213	174	174	202	202	182	182	165	165	241	241	178	178
As97	219	223	150	150	213	227	218	218	169	169	172	176	209	211	174	174	202	208	182	182	165	165	259	259	178	178
As97P1	219	223	150	150	213	227	218	218	169	169	176	176	209	209	174	174	202	208	182	182	165	165	259	259	178	178
As97P2	219	219	150	150	227	227	218	218	169	169	172	176	209	209	174	174	202	208	182	182	165	165	259	259	178	178
As97P3	219	221	150	150	213	229	218	218	169	179	172	176			174	182	202	208	182	182	165	165	243	259	178	178
As97P4	219	219	150	150	213	213	218	218	169	169	172	176	209	211	174	174	202	202	182	182	165	165	259	259	178	178
As97P5	219	223	150	150	213	213	218	218							174	174	202	202	182	182	165	165	259	259	178	178
As97P6	219	223	150	150	227	227	218	218	169	169					174	174	208	208	182	182	165	165	259	259	178	178
As97P7	219	223	150	150	213	213	218	218	169	169	172	172	209	211	174	174	202	202	182	182	165	165	259	259	178	178
As97P8	221	223	148	150	213	227	218	218	169	179	172	172	211	211	174	182	208	208	182	182	165	165	243	259	178	178
As97P9	223	223	150	150	213	227	218	218	169	169	172	176			174	174	202	208	182	182	165	165	259	259	178	178
As97P10	219	219	148	150	227	227	218	218	169	169	172	176	209	211	174	174	208	208	182	182	165	165	259	259	178	178
As97P11	219	221	148	150	227	235	218	218	169	169	172	176			174	174	200	208	182	182	165	165	259	259	178	178
As97P12	219	219	148	150	227	229	218	218	169	179	172	176	211	211	174	176	202	208	182	182	165	165	259	259	178	178
As97P13	219	223	150	150	213	227	218	218	169	169	172	176			174	174	202	208	182	182	165	165	259	259	178	178
As97P14	219	219	150	150	213	227	218	218	169	169	172	176	2011	211	174	174	202	208	182	182	165	165	259	259	178	178
As98	221	221	150	178	229	235	218	218	169	169	172	176	211	211	174	174	200	204	182	182	159	165	241	241	178	184
As98P1	221	221	178	178	235	235	218	218	169	169	172	172	211	211	174	174	204	204	182	182	165	165	241	241	184	184
As98P2	221	221	150	150	229	235	218	218	169	169	176	176	211	211	174	174	202	204	182	182	159	165	241	241	178	184
As98P3	221	221	178	178	229	235	218	218	169	169	176	176	211	211	174	174	202	204	182	182	159	165	241	241	178	184
As98P4	221	223	150	178	229	229	218	218	169	169	172	176	209	211	174	174	200	200	182	182	159	165	241	241	178	184
As98P5	221	221	150	178	235	235	218	218	169	169	172	176	211	211	174	174	202	204	182	182	159	165	241	241	178	178
As98P6	221	221	178	178	229	235	218	218	169	169	172	176	211	211	174	174	202	204	182	182	159	165	241	241	178	178
As98P7	219	221	148	178	229	235	218	218	169	169					174	174	204	210	182	182	165	165	241	241	178	184
As98P8	221	223	148	178	229	229	218	218	169	179					174	174	200	200	182	182	159	159	241	241	178	178
As98P9	221	221	178	178	229	235	218	220	169	169	172	172	211	211	174	174	200	204	182	182	159	165	241	241	178	184
As98P10	221	221	150	178	229	235	218	218	169	169	172	172	211	211	174	174	204	204	182	182	159	159			178	184
As98P11			150	178	227	229	218	218			172	176			174	174	204	208	182	182	165	165	241	241
As98P12	219	221	154	178	229	235	218	218	169	169	172	176	211	211	174	174	204	210	182	182	159	159	241	241	178	178
As99	219	223	148	148	231	231	218	220	169	179	176	176	209	211	174	176	202	202	182	182	165	165	259	259	178	178
As99P1	217	223	148	176	231	231	218	218	169	179	176	176	211	211	176	178	202	202	182	182	165	165	241	259	178	178
As99P2	219	221	148	148	217	231	220	220	169	169	172	176	209	211	174	174	200	202	182	182	165	165	241	259	178	178
As99P3	219	225	148	150	231	231	220	220	179	179	176	176	209	209	174	176	202	202	182	182	165	165	241	259	178	178
As99P4	219	223	148	148	231	237	218	218	169	179			211	211	174	176	202	202	182	182	165	165	241	259	178	178
As99P5	219	221	148	148	219	231	218	220	169	179	172	176	211	211	176	176	200	202	182	182	165	165	241	259	178	178
As99P6	219	219	148	148	215	231	220	220	169	169	176	176	211	211	172	176	202	204	182	182	165	165	241	259	178	184
As99P7	219	223	148	176	231	231	218	218	169	179	172	176	209	211	174	176	202	204	182	182	165	165	241	259	178	184
As99P8	221	223	148	148	231	231	218	218	169	169	172	176	209	211	174	176	202	204	182	182	165	165	241	259	178	184
As99P9	219	223	148	150	231	231	218	220	169	169	172	176	209	211	174	176	202	202	182	182	165	165	241	259	178	178
As99P10	219	221	148	152	231	233	218	220	169	179	176	176			176	176	202	212	182	182	165	165			178	178
As99P11	221	223	148	148	215	231	218	220	169	179	172	176			174	176	202	202	182	182	165	165
As99P12	221	223	148	148	229	231	218	220					211	211	176	176	202	208	182	182	165	165	243	259	178	178
As99P13	217	223	148	150	231	231	218	218	169	169	176	176	211	211	176	178	200	202	182	182	165	165	259	259	178	184
As99P14	217	219	148	150	229	231	218	220	169	169	172	176	211	211	174	176	198	202	182	182	165	165	241	259	178	178
As100	219	221	148	148	229	233	218	220	179	179	172	172	211	211	174	182	198	208	182	182	159	165	241	241	178	184
As100P1	219	221	148	148	231	233	218	218	179	179	172	172	211	211	174	182	198	208	182	182	159	159	241	241	178	184
As100P2	219	221	148	148	233	233	218	218	179	179	172	172	211	211	174	182	198	208	182	182	159	159	241	241	178	184
As100P3	219	221	148	148	233	233	218	220	179	179	172	172	211	211	174	174	208	208	182	182	159	159	241	241	184	184
As100P4	219	221	148	148	229	229	218	220	179	179	172	172	211	211	174	182	198	198	182	182	159	165	241	241	184	184
As100P5	219	221	148	148	229	233	218	220	179	179	172	172	211	211	174	182	198	198	182	182	159	165	241	241	178	184
As100P6	219	219	148	148	229	229	218	218			172	172	211	211	174	174	198	198	182	182	159	165	241	241	178	184
As100P7	219	223	148	148	229	231	218	218	179	179	172	172	209	211	174	174	198	198	182	182	159	165	241	241	178	178
As100P8	219	221	148	148	229	229	218	220	179	179	172	172	211	211	174	182	198	208	182	182	165	165	241	241	178	184
As100P9	221	221	148	148	229	233	218	218	179	179	172	172	211	211	174	182	198	208	182	182	159	159	241	241	178	178
As100P10	219	221	148	152	225	233	218	218	179	179	172	176	211	211	174	174	198	200	182	182	165	165	241	241	184	184
As100P11	219	219	148	148	229	233	218	218	179	179	172	172	211	211	174	174	198	208	182	182	159	159	241	241	178	184
As100P12	219	221	148	150	217	233	218	220	169	179	172	172	211	211	174	174	198	202	182	182	165	165	241	241	178	184
As100P13	219	219	148	148	213	233	218	218	179	179	172	172	211	211	182	182	198	198	182	182	159	159	241	241	178	184
As100P14	219	221	148	148	229	233	218	220	179	179	172	172			182	182	198	208	182	182	165	165	241	241	178	178
As101	221	221	150	176	231	235	218	218	169	169	172	176	211	211	174	174	204	204	182	182	159	165	241	241	184	184
As101P1	217	221	150	176	231	231	218	218	169	169	172	176	211	211	174	174	204	204	182	182	159	165	241	241	184	184
As101P2	217	221	150	176	231	235	218	218	169	169	172	176	211	211	174	174	204	204	182	182	159	165	241	241	184	184
As101P3	221	221	150	176	231	235	218	218	169	169	172	176	211	211	174	174	204	204	182	182	165	165	241	241	184	184
As101P4	221	221	148	176	229	235	218	218	169	169	172	172	211	211	174	176	204	204	182	182	159	165	241	241	178	184
As101P5	221	221	150	150	231	235	218	218	169	169	172	176	211	211	174	174	204	204	182	182	165	165	241	241	184	184
As101P6	221	221	150	176	231	235	218	218	169	169	172	176	211	211	174	174	204	204	182	182	165	165	241	241	184	184
As101P7			150	176	231	231	218	218	169	169	172	176	211	211	174	174	204	204	182	182	165	165	241	241	184	184
As101P8	219	221	150	150	231	231	218	220	169	169	172	172	211	211	174	176	204	210	182	182	165	165	241	241	178	184
As101P9	217	221	150	176	231	235	218	218	169	169	172	176	211	211	174	174	204	204	182	182	159	165	241	241	184	184
As101P10	217	221	150	150	231	235	218	218	169	169	172	176	211	211	174	174	204	204	182	182	159	165	241	241	184	184
As102	219	225	138	150	231	231	218	220	187	187	172	172	211	211	174	174	210	210	182	182	159	165	241	241	178	178
As102P1			138	138	231	231	218	220			172	172	211	211	174	174	210	210	182	182	165	165	241	241	178	178
As102P2	219	225	138	138	231	231	218	218	187	187	172	172	211	211	174	176	210	210	182	182	165	165	241	241	178	178
As102P3	225	225	150	150	231	231	218	218	187	187	172	172	211	211	174	176	210	210	182	182	165	165	241	241	178	178
As102P4	221	225	150	150	217	231	218	218			172	176	211	211	174	174	202	210	182	182	165	165	241	241	178	178
As102P5	225	225	138	150	231	231	218	220	187	187	172	172			174	174			182	182	159	159	241	241	178	178
As102P6	219	219	138	138	231	231	218	218	187	187					174	176	210	210	182	182	165	165	241	241	178	178
As102P7			150	150	231	231	218	220			172	172	211	211	174	174	202	210	182	182	165	165	241	241	178	178
As102P8	219	225	138	152	231	231	218	220			172	172	211	211	174	174	210	210	182	182	165	165	241	241	178	184
As102P9	219	221	150	152	231	231	218	220	169	187	172	172	211	211	174	174	210	222	182	182	165	165	241	241	178	178
As102P10	219	219	150	150	231	231	218	218	169	187	172	176	211	211	174	176	204	210	182	182	159	165	241	241	178	184
As102P11	217	225	138	176	231	231	218	218	169	187	172	176	211	211	174	176	204	210	182	182	165	165	241	241	178	184
As102P12	225	225	150	150	231	231	218	220	187	187	172	172	211	211	174	176	210	210	182	182	165	165	241	241	178	178
As102P13	225	225	138	150	231	231	220	220	187	187	172	172	211	211	174	174	210	210	182	182	165	165	241	241	178	178
As102P14	219	225	138	150	231	231	220	220	187	187	172	172	211	211	174	176	210	210	182	182	165	165	241	241	178	178
As103	221	221	150	176	229	235	218	218	169	169	172	176	211	211	174	174	200	204	182	182	159	165	241	241	178	184
As103P1	221	221	150	150	229	235	218	218	169	169	172	176	211	211	174	174	200	204	182	182	159	159	241	241
As103P2	221	221	150	150	229	235	218	218	169	169	176	176			174	174	200	200	182	182	159	159	241	241	178	184
As103P3	221	221	150	150	221	229	218	218	169	169	176	176			174	174	204	208	182	182	165	165	241	241
As103P4	221	221	176	176	229	235	218	218	169	169	176	176	211	211	174	174	204	204	182	182	159	159	241	241	178	184
As103P5	221	221	150	150	229	229	218	218	169	171	172	172	211	211	174	174	200	200	182	182	159	165	241	241	178	184
As103P6	221	221	150	150	229	235	218	218	169	171	172	176	211	211	174	174	200	204	182	182	159	165	241	241	178	178
As103P7	221	221	150	150	213	229	218	218	169	169					174	174	200	210	182	182	165	165	241	241	178	184
As103P8	221	221	176	176	229	235	218	218							174	174	200	204	182	182	159	165	241	241	178	184
As103P9	221	223	150	150	229	229	218	218	169	169	172	176	209	211	174	174	204	204	182	182	159	165	241	241	184	184
As103P10	221	221	150	176	229	229	218	218	169	169	172	176	211	211	174	174	200	200	182	182	165	165	241	241	178	178
As103P11	221	221	150	150	229	235	218	218	169	169	172	176	211	211	174	174	200	204	182	182	165	165	241	241	178	178
As103P12	221	221	148	150	229	231	218	218			172	176	209	211	174	174	204	210	182	182	159	165	241	241	178	184
As103P13	221	221	150	150	235	235	218	218	169	169	172	176	211	211	174	174	200	204	182	182	165	165	241	241	178	184
As103P14	221	221	150	176	229	229	218	218	169	169	172	172	211	211	174	174	200	204	182	182	159	165	241	241	178	178
As104	219	219	148	150	213	213	218	220	169	169	172	176	211	211	174	174	208	208	182	182	165	165	241	241	178	178
As104P1	219	221	148	150	213	213	218	218	169	169	172	176	211	211	174	176	208	208	182	182	165	165	241	241	178	178
As104P2	219	219			213	231	218	218	169	169	172	176	211	211	174	178	200	208	182	182	165	165	241	259	178	178
As104P3	219	221	148	150	213	213	218	218	169	169	172	172	211	211	174	176	208	208	182	182	165	165	241	241
As104P4	219	223	148	150	213	229	218	220	169	169	172	172	209	211	174	174	204	208	182	182	165	165	241	241	178	178
As104P5	219	225	150	172	213	213	218	220	169	179	172	176	211	211	174	174	204	208	182	182	159	165	241	241	178	178
As104P6	219	219	148	152	213	231	218	218	169	169	172	176	209	211	174	174	200	208	182	182	165	165	241	241	178	184
As104P7	219	219	148	150	213	213	218	218	169	169	172	172	211	211	174	176	208	208	182	182	165	165	241	241	178	178
As104P8	219	219	150	176	213	231	218	218	169	169	176	176	209	211	174	174	208	208	182	182	165	165	241	241	178	178
As104P9	219	217	148	150	213	229	218	218	169	169	172	172			174	178	208	208	182	182	165	165	241	241	178	184
As104P10	219	223	148	150	213	227	218	220							174	174	200	208	182	182	159	165	241	241	178	178
As104P11	219	223	148	150	213	227	218	218	169	179	172	172	209	211	174	178	200	208	182	182	165	165	241	241	178	184
As105	219	219	148	148	229	237	218	218	179	179	172	176	211	211	174	174	200	206	182	182	159	165	241	241	178	178
As105P1	219	219	148	148	237	237	218	218	179	179	172	172	211	211	174	174	200	206	182	182	159	159	241	241	178	178
As105P2	219	219	148	148	229	237	218	218	179	179	172	172	211	211	174	174	206	206	182	182	165	165	241	241	178	178
As105P3	219	219	148	148	229	237	218	218	179	179	172	176	211	211	174	174	200	206	182	182	159	165	241	241	178	178
As105P4	219	219	148	148	229	229	218	218	179	179	172	172			174	174	206	206	182	182	159	159	241	241	178	178
As105P5	219	221	148	150	229	229	218	218	169	179	176	176	209	211	174	174	206	206	182	182	165	165	241	259	178	184
As105P6	219	219	148	148	229	237	218	218	179	179	172	176	211	211	174	174	200	206	182	182	159	159	241	241	178	178
As105P7	219	221	148	148	217	237	218	220	169	179	172	176	209	211	174	174	200	200	182	182	159	165	241	241	178	178
As105P8	219	219	148	148	237	237	218	218	179	179	172	172	211	211	174	174	206	206	182	182	159	165	241	241	178	178
As105P9	219	219	148	148	229	237	218	218	179	179	176	176	211	211	174	174	200	200	182	182	159	159	241	241	178	178
As105P10	219	219	148	148	229	237	218	218	179	179	176	176	211	211	174	174	200	206	182	182	159	159	241	241	178	178
As105P11	219	219	148	148	229	237	218	218			172	176	211	211			200	200	182	182	159	165	241	241	178	178
As105P12	219	219	148	148	229	237	218	218	179	179	172	176	211	211	174	174	206	206	182	182	159	165	241	241	178	178
As105P13	219	219	148	148	237	237	218	218	179	179	176	176	211	211	174	174	200	200	182	182	165	165	241	241	178	178
As105P14	219	219	148	148	237	237	218	218	179	179	172	172	211	211	174	174	200	206	182	182	159	165	241	241	178	178
As106	219	221	148	148	231	233	218	220	169	169	172	176	209	209	174	174	200	202	182	182	165	165	241	241	178	178
As106P1	219	223	148	148	231	231	218	218			172	172			174	174	200	206	170	182	159	165	241	241	178	178
As106P2	219	219	148	148	231	233	220	220	169	169	172	172	209	209	174	174	200	206	182	182	165	165	241	241	178	178
As106P3	217	221	146	150	213	233	218	220	169	169	172	176	209	209	174	174	200	200	182	182	165	165	241	241
As106P4	217	219	146	148	213	231	218	218	169	169	176	176	209	211	174	174	202	202	182	182	165	165	241	241	178	178
As106P5	217	221	148	148	213	233	218	220	169	179	176	176	209	209	174	174	200	200	182	182	159	165	241	241	178	178
As106P6	219	221	148	148	231	231	218	220	169	169	172	176	209	209	174	174	202	202	182	182	165	165	241	241	178	178
As106P7	217	219	148	152	225	233	218	220	169	169	176	176	209	209	174	174	200	202	182	182	165	165	241	241	178	178
As106P8	217	219	148	148	233	235	218	218	169	169	172	172	209	209	174	174	200	200	182	182	165	165	241	241	178	178
As106P9	219	219	148	148	233	235	218	218	169	169	172	172	209	209	174	176	200	208	182	182	165	165	241	241	178	178
As106P10			148	148	233	233	218	220	169	169	172	172	209	209	174	174	200	202	182	182	165	165	241	241
As106P11	217	221	148	150	213	233	218	218	169	169	172	176	209	209	174	174	200	200	182	182	165	165	241	241	178	178
As106P12	217	219	148	148	231	233	218	220	169	169	172	176	209	209	174	174	200	202	182	182	165	165	241	241	178	178
As106P14	219	219	148	148	231	233	216	220	169	169	172	176	209	211			200	208	182	182	165	165	241	241	178	178
As106P13	217	219	138	148	231	233	218	220	169	169	172	172	209	211	174	174	200	208	182	182	165	165	241	241	178	178
As107	219	221	148	148	213	213	218	218	169	169	172	172	209	211	174	178	200	200	182	182	165	165	241	241	178	178
As107P1	221	221	148	148	213	213	218	218	169	169	172	172	209	211	174	174	200	200	182	182	165	165	241	241	178	178
As107P2	219	219	148	150	213	213	218	220	169	187	172	172			174	176	200	204	182	182	165	165	241	241	178	178
As107P3	219	221	148	148	213	213	218	218	169	169	172	172			174	174	200	200	182	182	165	165	241	241	178	178
As107P4	219	219	148	148	213	213	218	218	169	169	172	172	209	209	174	174	200	200	182	182	165	165	241	241	178	178
As107P5	219	219	148	148	213	213	218	218	169	169	172	172	209	211	174	174	200	200	182	182	165	165	241	241	178	178
As107P6	219	221	148	176	213	229	218	218	169	169	172	176	209	209	174	174	198	200	182	182	165	165	241	241	178	178
As107P7	221	221	148	148	213	229	218	218	169	169	172	172	211	211	174	174	200	200	182	182	165	165	241	241	178	184
As107P8	219	219	148	148	213	213	218	218	169	169	172	172	209	211	174	174	200	200	182	182	165	165	241	241	178	178
As108	219	221	148	150	213	213	218	220	169	169	172	172	211	211	174	174	200	206	182	182	165	165	241	241	178	178
As108P1	219	221	148	148	213	213	218	220	169	169	172	172	211	211	174	176	206	206	182	182	165	165	241	241	178	178
As108P2	219	219	148	178	213	231	218	220	169	169	172	176	209	211	174	176	200	208	182	182	165	165	241	241	178	178
As108P3	219	221	148	148	213	229	218	220	169	169	172	172	211	211	174	176	200	200	182	182	165	165	241	241	178	178
As108P4	221	221	150	150	213	213	220	220	169	169	172	172	211	211	174	176	206	206	182	182	165	165	241	241	178	178
As108P5	221	221	148	150	213	213	218	220	169	169	172	172	211	211	174	174	206	206	182	182	165	165	241	241	178	178
As108P6	219	221	150	150	213	213	218	220	169	169	172	172	211	211	174	176	200	206	182	182	165	165	241	241	178	178
As108P7	219	221	148	150	213	213	220	220	169	169	172	172	211	211	174	174	206	206	182	182	165	165	241	241	178	178
As108P8	219	221	148	150	213	213	218	218	169	169	172	172	211	211	174	174	200	200	182	182	165	165	241	241	178	178
As108P9	219	221	148	148	213	217	220	220	169	169	172	172	209	211	174	176	200	206	182	182	165	165	241	241	178	178
As108P10	219	219	150	150	213	233	218	220	169	169	172	172	211	211	174	176	206	208	182	182	165	165	241	241	178	178
As109	219	219	148	148	231	231	218	218	169	169	172	172	209	209	176	176	200	208	182	182	159	159	241	241	178	178
As109P1	217	219	148	148	231	231	218	220	169	169	172	172			176	176	200	208	182	182	159	165	241	241	178	178
As109P2	219	219	148	148	231	231	218	218	169	169	172	172	209	209	176	176	200	208	182	182	159	159	241	241	178	178
As109P3	219	219	148	148	231	231	218	218	169	169	172	172	209	209	176	176	200	208	182	182	159	159	241	241	178	178
As109P4	219	219	148	148	231	231	218	218	169	169	172	172	209	209	176	176	200	200	182	182	159	159	241	241	178	178
As109P5	219	219	148	148	231	231	218	218	169	169	172	172	209	209	176	176	200	208	182	182	159	159	241	241	178	178
As109P6	219	219	148	148	231	231	218	218	169	169	172	172	209	209	176	176	200	208	182	182	159	159	241	241	178	178
As109P7	219	219	148	148	231	231	218	218	169	169	172	172	209	209	176	176	200	208	182	182	159	159	241	241	178	178
As109P8	219	219	148	148	231	231	218	218	169	169	172	172	209	209	176	176	200	200	182	182	159	159	241	241	178	178
As109P9	217	219	148	148	231	231	218	220	169	169	172	176	209	2011	176	176	200	208	182	182	159	165	241	241	178	178
As109P10	219	219	148	148	231	231	218	218	169	169	172	172	209	209	176	176	200	208	182	182	159	159	241	241	178	178
As109P11	219	219	148	148	231	231	218	218	169	169	172	172	209	209	174	176	200	208	182	182	159	159	241	241	178	178
As109P12	219	219	148	148	231	231	218	218	169	169	172	172	209	209	176	176	200	208	182	182	159	159	241	241	178	178
As109P13	219	219	148	148	231	231	218	218	169	169	172	172	209	209	176	176	200	200	182	182	159	159	241	241	178	178
As109P14	219	219	148	148	231	231	218	218	169	169	172	172	209	209	176	176	200	200	182	182	159	159	241	241	178	178
As110	219	223	178	178	217	229	218	218	169	171	176	176	211	211	174	174	226	226	182	182	165	165	241	241	178	178
As110P1	223	223	178	178	217	229	218	218			176	176	211	211	174	174	226	226	182	182	165	165	241	241	178	178
As110P2	219	223	148	178	229	231	218	218	169	171	172	176	209	211	174	176	200	226	182	182	159	165	241	241	178	178
As110P3	219	223	178	178	217	217	218	218	169	171			211	211	174	174	226	226	182	182	165	165	241	241	178	178
As110P4	219	223	178	178	217	217	218	218	169	169	176	176	211	211	174	174	226	226	182	182	165	165	241	241	178	178
As110P5	219	223	178	178	217	217	218	218	169	171	176	176	211	211	174	174	226	226	182	182	165	165	241	241	178	178
As110P6	223	223	178	178	217	229	218	218	169	169	176	176	211	211	174	174	226	226	182	182	165	165	241	241	178	178
As110P7	221	223	148	178	229	231	218	220	169	169	176	178	211	211	174	174	198	226	182	182	165	165	241	241	178	178
As110P8	219	223	178	178	217	229	218	218	169	169	176	176	211	211	174	174	226	226	182	182	165	165	241	241	178	178
As110P9	223	223	178	178	217	229	218	218	169	171	176	176	211	211	174	174	226	226	182	182	165	165	241	241	178	178
As110P10	223	223	178	178	217	229	218	218	171	171	176	176	211	211	174	174	226	226	182	182	165	165	241	241	178	178
As110P11	219	223	178	178	217	229	218	218	169	171	176	176	211	211	174	174	226	226	182	182	165	165	241	241	178	178
As110P12	219	219	178	178	217	229	218	218	169	171	176	176	211	211	174	174	226	226	182	182	165	165	241	241	178	178
As111	219	223	148	152	225	231	218	220	169	169	172	176	209	211	174	176	200	202	182	182	165	165	241	241	178	184
As111P1	219	223	148	152	231	231	218	220	169	169	172	176	209	211	174	176	200	202	182	182	165	165	241	241	178	178
As111P2	223	223	152	152	225	231	218	218	169	169	176	176	209	209	174	176	200	202	182	182	165	165	241	241	178	184
As111P3	223	223	152	152	225	231	218	220	169	169	172	176	209	211	176	176	200	202	182	182	165	165	241	241	178	184
As111P4	223	223	152	152	225	231	220	220	169	169	172	172	209	211	176	176	200	202	182	182	165	165	241	241	178	184
As111P5	223	223	148	152	225	231	218	220	169	169	172	176	209	211	174	176	200	202	182	182	165	165	241	241	178	184
As111P6	219	223	148	148	225	225	218	218	169	169			209	211	174	174	200	200	182	182	165	165	241	241	184	184
As111P7	219	223	148	152	225	225	218	220	169	169	172	176	209	211	174	176	202	202	182	182	165	165	241	241	184	184
As111P8	219	219	148	148	225	231	218	218	169	169	172	172	209	211	174	176	200	202	182	182	165	165	241	241	178	184
As111P9	219	219	152	152	225	225	218	220	169	169	172	176	209	211	174	176	200	202	182	182	165	165	241	241	184	184
As111P10	219	223	148	148	225	225	218	220	169	169	176	176	209	211	174	174	200	200	182	182	165	165	241	241	178	184
As111P11	223	223	148	152	213	231	218	218	169	169	172	176	209	211	174	176	202	208	182	182	165	165	241	241	178	184
As111P12	219	221	148	150	229	231	218	220	169	169	172	176	209	211	174	174	200	206	182	182	165	165	241	241	178	178
As112	221	221	150	150	229	229	218	218	169	169	176	176	211	211	174	174	206	206	182	182	165	165	241	241	178	178
As112P1	217	221	150	152	229	233	218	218	169	169	176	176	211	211	174	174	206	208	182	182	165	165	241	241	178	184
As112P2	221	221	150	150	229	229	218	218	169	169	172	176	209	211	174	174	200	206	182	182	159	165	241	241	178	184
As112P3	219	221	150	174	229	231	218	220	169	169	172	176	211	211	174	174	206	208	182	182	165	165	241	241	178	178
As112P4	221	223	150	150	215	229	218	220	169	179	176	176	211	211	174	174	206	206	182	182	165	165	241	241
As112P5	221	225	150	138	229	231	218	220	169	187	172	176	211	211	174	176	206	210	182	182	165	165	241	241	178	178
As112P6	221	221	150	174	221	229	218	218	169	169	172	176	211	211	174	174	206	206	182	182	165	165	241	241	178	184
As112P7	219	221	150	150	229	231	218	218	169	169	176	176	211	211	174	174	198	206	182	182	165	165	241	241	178	184
As112P8	221	225	150	150	229	231	218	220	169	187	172	176	211	211	174	174	206	210	182	182	165	165	241	241	178	178
As112P9	219	221	150	150	229	231	218	218	169	169	176	176	211	211	174	174	200	206	182	182	165	165	241	241	178	184
As112P10	221	221	150	168	217	229	218	218	169	169			211	211	174	176	206	208	182	182	165	165	241	241	178	184
As112P11	219	221	150	152	215	229	218	218							174	176	200	206	182	182	165	165	241	241	178	178
As112P12	221	221	148	150	229	229	218	220			172	176	209	211			206	206	182	182	165	165	241	241	178	178
As113	219	219	148	148	227	231	218	220	169	169	172	176	211	211	174	180	200	200	182	182	159	165	241	241	178	178
As113P1	217	219	148	148	215	231	218	220			172	176	211	211	174	174	200	202	182	182	165	165	241	259	178	178
As113P2	219	219	148	152	227	231	218	220	169	169	172	176	211	211	174	174	200	200	182	182	159	159	241	241	178	178
As113P3	219	219	148	148	227	227	218	220	169	169	172	176	211	211	174	174	200	200	182	182	165	165	241	241	178	178
As113P4	219	219	148	148	227	231	218	218	169	169	176	176	211	211	174	174	200	200	182	182	159	159	241	241	178	178
As113P5	219	221	148	148	231	231	218	220	169	169	176	176			174	174	200	200	182	182	165	165	241	241	178	184
As113P6	219	221	148	148	227	217	218	220	169	179	172	172	211	211	174	174	200	212	182	182	159	165	241	241	178	178
As113P7	219	221	148	150			218	218	169	169	172	176	211	211	174	180			182	182	165	165	241	241	178	178
As113P8	219	219	148	148	231	231	218	220	169	169	176	176	211	211	174	180	200	200	182	182	159	165	241	241	178	178
As113P9	219	219	148	148	231	231	218	220	169	169	172	176	211	211	174	174	200	200	182	182	159	165	241	241	178	178
As113P10	219	219	148	148	227	227	220	220	169	169	176	176			174	176	200	200	182	182	165	165	241	241	178	184
As114	219	221	148	150	229	229	218	220	169	169	172	176	209	211	174	180	206	210	182	182	165	165	241	241	178	178
As114P1	217	221	150	152	229	233	218	218	169	169	172	176	211	211	174	180	206	208	182	182	165	165	241	241	178	184
As114P2	221	223	150	150	229	229	218	218	169	169	172	176	209	211			208	210	182	182	159	165	241	241	178	178
As114P3	219	219	148	150	229	229	218	218	169	169	172	172	209	211	174	180	206	210	182	182	165	165	241	241	178	178
As114P4	219	223	150	150	229	231	218	220	169	169	172	176	209	211	174	176	206	206	182	182	165	165	241	241	178	178
As114P5	219	221	148	150	229	229	218	220					211	211	180	180	206	206	182	182	165	165	241	241	178	178
As114P6	219	221	148	148	229	231	218	220					209	211	174	174			182	182	165	165	241	241	178	178
As114P7	221	221	148	148	229	229	218	218	169	171	172	176	211	211	174	180	200	210	182	182	165	165	241	241	178	178
As114P8	219	221	148	148	229	229	218	220	169	179	176	176	209	211	174	174	210	210	182	182	159	165	241	241	178	178
As114P9	221	221	150	150	229	229	218	218	169	169	172	172	209	209	174	180	206	210	182	182	165	165	241	241	178	178
As114P10	219	219	150	150	229	229	220	220	169	169	176	176	211	211	174	182	206	206	182	182	165	165	241	241	178	184
As114P11	219	221	150	150	229	229	218	218	169	169	172	176	209	211	174	174	200	206	182	182	165	165	241	241	178	178
As114P12	219	221	148	148	229	229	218	220	169	171	172	176	211	211	174	180	206	206	182	182	165	165	241	241	178	178
As115	217	219	148	154	229	229	216	218	169	169	172	172	209	211	174	174	208	210	182	182	165	165	241	241	178	178
As115P1	217	217	148	154	229	229	216	218	169	169	172	172	209	211	174	174	208	210	182	182	165	165	241	241	178	178
As115P2	217	219	148	154	229	229	216	218	169	169	172	172	209	211	174	174	208	210	182	182	165	165	241	241
As115P3	217	217	154	154	229	229	216	218	169	169	172	172	209	211	174	174	208	210	182	182	165	165	241	241	178	178
As115P4	219	219	154	154	229	229	216	216	169	169	172	172	209	211	174	174	208	210	182	182	165	165	241	241	178	178
As115P5	217	219	148	154	229	229	216	216	169	169	172	172			174	174	210	210	182	182	165	165	241	241	178	178
As115P6	217	217	148	154	229	229	216	216			172	172	209	211	174	174	208	208	182	182	165	165	241	241	178	178
As115P7	217	219	148	154	229	229	216	216	169	169	172	172	209	211	174	174	210	210	182	182	165	165	241	241	178	178
As115P8	217	219	154	154	229	229	218	218	169	169	172	172	209	211	174	174	208	210	182	182	165	165	241	241	178	178
As115P9	217	219	148	148	229	229	216	218			172	172	209	209	174	174	208	210	182	182	165	165	241	241	178	178
As115P10	217	217	154	154	229	229	216	218	169	169	172	172	209	209	174	174	208	210	182	182	165	165	241	241	178	178
As115P11	219	219	154	154	229	229	216	218	169	169	172	172			174	174	208	210	182	182	165	165	241	241	178	178
As115P12	219	221	148	154	229	229	216	220	169	169	172	172	209	211	174	174	204	208	182	182	165	165	241	241	178	178
As116	217	221	150	152	227	233	218	218	169	169	176	176	209	211	174	174	200	208	182	182	165	165	241	241	184	184
As116P1	219	221	150	150	227	227	218	218	169	169	176	176	209	209	174	174	200	208	182	182	165	165	241	241	184	184
As116P2	221	221	150	150	227	227	218	218	169	169	176	176	209	211	174	174	208	208	182	182	165	165	241	241	184	184
As116P3			150	150	227	231	218	218	169	169	172	176	209	211	174	174	200	200	182	182	165	165	241	241	178	184
As116P4	221	221	150	152	231	233	218	218	169	169	176	176	209	211	174	174	200	200	182	182	165	165	241	241	184	184
As116P5	221	221	152	152	231	233	218	218	169	169	176	176	209	209	174	174	200	208	182	182	165	165	241	241	184	184
As116P6	221	221	152	152	227	233	218	218	169	169	176	176	209	209	174	174	200	200	182	182	165	165	241	241	184	184
As116P7	217	221	152	152	227	233	218	218	169	169	176	176	209	211	174	174	208	208	182	182	165	165	241	241	184	184
As116P8	221	221	150	152	227	233	218	218	169	169	176	176	209	211	174	174	208	208	182	182	165	165	241	241	184	184
As116P9	217	221	150	150	227	227	218	218	169	169	176	176	211	211	174	174	200	208	182	182	165	165	241	241	184	184
As116P10	217	221	150	152	227	229	218	218	169	169	176	176	209	211	174	174	198	208	182	182	165	165	241	241	178	184
As116P11	217	221	146	152	231	233	218	218	169	169	176	176	209	211	174	174	200	204	182	182	159	165	241	241	184	184
As117	219	219	150	150	213	229	218	218	169	169	172	172	211	211	174	174	200	202	182	182	165	165	241	241	178	178
As117P1	219	219	150	150	213	213			169	169	172	172	211	211	174	174	202	202	182	182	165	165	241	241	178	178
As117P2	219	219	150	150	213	229	218	218			172	172	211	211	174	174	200	202	182	182	165	165	241	241	178	178
As117P3	219	219	150	150	213	229	218	218	169	169	172	172	211	211	174	174	200	202	182	182	165	165	241	241	178	178
As117P4	219	219	150	150	213	231	218	220	169	179	172	176	211	211	174	174	202	206	182	182	165	165	241	241	178	178
As117P5	219	219	150	150	213	229	218	218	169	169	172	172	211	211	174	174	200	202	182	182	165	165	241	241	178	178
As117P6	219	219	150	150	213	229	218	218	169	169	172	172	211	211	174	174	200	202	182	182	165	165	241	241	178	178
As117P7	219	219	150	150	229	229	218	218	169	169	172	172	211	211	174	174	200	202	182	182	165	165	241	241	178	178
As117P8	219	219	150	150	213	213	218	218	169	169	172	172	211	211	174	174	200	200	182	182	165	165	241	241	178	178
As117P9	219	219	150	150	213	213	218	218	169	169	172	172	211	211	174	174	202	202	182	182	165	165	241	241	178	178
As117P10	219	219	150	150	213	213	218	218	169	169	172	172	211	211	174	174	200	202	182	182	165	165	241	241	178	178
As117P11	219	219	150	150	213	229	218	220	169	169	172	176	211	211	174	174	198	200	182	182	159	165	241	241
As117P12	219	219	150	150	213	229	218	218	169	169	172	172	211	211	174	174	200	202	182	182	165	165	241	241	178	184
As118	219	219	148	150	217	231	218	220	169	169	176	176	211	211	174	174	198	208	182	182	165	165	241	241	184	184
As118P1	219	219	148	150	217	233	218	220	169	169	172	176	211	211	174	176	208	208	182	182	165	165	241	241	178	184
As118P2	219	219	150	150	213	231	218	220	169	179	172	176	211	211	174	176	198	200	182	182	165	165	241	241	178	184
As118P3	219	219	148	150	217	231	218	220	169	169	176	176	211	211	174	174	198	198	182	182	165	165	241	241	184	184
As118P4	219	219	148	148	217	231	218	220	169	169	176	176	211	211	174	174	198	198	182	182	165	165	241	241	184	184
As118P5	219	219	148	150	231	231	218	218	169	169	176	176	211	211	174	174	198	198	182	182	165	165	241	241
As118P6	219	219	148	148	217	217	218	220	169	169	176	176	211	211	174	174	198	208	182	182	165	165	241	241	184	184
As118P7	219	219	148	152	231	231	218	218	169	169	176	176	211	211	174	174	208	208	182	182	159	165	241	241	178	184
As118P8	219	219	148	150	231	231	218	218	169	169	176	176	211	211	174	174	198	198	182	182	165	165	241	241	184	184
As118P9	219	219	148	150	231	231	218	218	169	169	176	176	211	211	174	174	198	208	182	182	165	165	241	241	184	184
As118P10	219	219	148	148			218	218	169	169	176	176	211	211	174	174	198	208	182	182	165	165	241	241	184	184
As119	219	219	148	148	213	229	216	220	167	169	172	172	209	209	174	174	200	204	182	182	165	165	241	241	178	178
As119P1	219	221	148	148	213	227	216	220	169	179	172	172	209	209	174	174	204	222	182	182	165	165	241	241	178	178
As119P2	219	219	148	148	227	229	216	220	167	167	172	172	209	209	174	174	204	204	182	182	165	165	241	241	178	178
As119P3	219	219	148	148	213	229	220	220	169	179	172	172	209	209	174	174	200	204	182	182	165	165	241	241	178	178
As119P4	219	225	148	148	229	231	216	218	167	169	172	176	209	209	174	174	200	208	182	182	165	165	241	241	178	178
As119P5	219	219	148	148	213	229	216	220	167	167	172	172	209	209	174	174	200	204	182	182	165	165	241	241	178	178
As119P6	219	221	148	148	213	213	218	220	169	179	172	172	209	211	174	174	200	204	182	182	165	165	241	241	178	178
As119P7	219	219	148	150	213	227	218	220	167	169	172	172	209	209	174	174	204	204	182	182	165	165	241	259	178	178
As119P8	219	219	148	148	229	231	216	218	167	169	172	176	209	211	174	174	200	208	182	182	165	165	241	241	178	178
As119P9	219	223	148	152	229	231	216	220	169	179	172	172	209	209	174	174	204	204	182	182	165	165	241	241	178	178
As119P11	219	219	148	148	213	229	216	220	167	179	172	172	209	209	174	174	200	200	182	182	165	165	241	241	178	178
As119P10	219	219	148	148	229	229	216	216	169	179	172	172	209	209	174	174	204	204	182	182	165	165	241	241	178	178
